# Supplementary material for: Association between alcohol consumption and impaired work performance (presenteeism): a systematic review
Source: PubMed Central journal article supplement — BMJ Open. 2019 Jul 16;9(7):e029184. doi: 10.1136/bmjopen-2019-029184 (PMC6661906; doi:10.1136/bmjopen-2019-029184), 2019-07-16
Supplement: bmjopen-2019-029184.draft_revisions.pdf [file bmjopen-2019-029184.draft_revisions.pdf]

# BMJ Open

BMJ Open is committed to open peer review. As part of this commitment we make the peer review history of every article we publish publicly available.

When an article is published we post the peer reviewers' comments and the authors' responses online. We also post the versions of the paper that were used during peer review. These are the versions that the peer review comments apply to.

The versions of the paper that follow are the versions that were submitted during the peer review process. They are not the versions of record or the final published versions. They should not be cited or distributed as the published version of this manuscript.

BMJ Open is an open access journal and the full, final, typeset and author-corrected version of record of the manuscript is available on our site with no access controls, subscription charges or pay-per-view fees (<http://bmjopen.bmj.com>).

If you have any questions on BMJ Open's open peer review process please email [info.bmjopen@bmj.com](mailto:info.bmjopen@bmj.com)

# BMJ Open

## Association between alcohol consumption and impaired work performance (presenteeism): A systematic review

|                               |                                                                                                                                                                                                                                                                                                                                                                                                                                                  |
|-------------------------------|--------------------------------------------------------------------------------------------------------------------------------------------------------------------------------------------------------------------------------------------------------------------------------------------------------------------------------------------------------------------------------------------------------------------------------------------------|
| Journal:                      | <i>BMJ Open</i>                                                                                                                                                                                                                                                                                                                                                                                                                                  |
| Manuscript ID                 | bmjopen-2019-029184                                                                                                                                                                                                                                                                                                                                                                                                                              |
| Article Type:                 | Research                                                                                                                                                                                                                                                                                                                                                                                                                                         |
| Date Submitted by the Author: | 16-Jan-2019                                                                                                                                                                                                                                                                                                                                                                                                                                      |
| Complete List of Authors:     | Thørrisen, Mikkel; OsloMet - Oslo Metropolitan University, Bonsaksen, Tore; OsloMet - Oslo Metropolitan University; VID Specialized University<br>Hashemi, Neda; University of Stavanger<br>Kjeken, Ingvild; OsloMet - Oslo Metropolitan University; Diakonhjemmet Hospital<br>Van Mechelen, Willem; VU University Medical Center, Public and Occupational Health<br>Aas, Randi; University of Stavanger; OsloMet - Oslo Metropolitan University |
| Keywords:                     | EPIDEMIOLOGY, OCCUPATIONAL & INDUSTRIAL MEDICINE, PREVENTIVE MEDICINE, Substance misuse < PSYCHIATRY, PUBLIC HEALTH, SOCIAL MEDICINE                                                                                                                                                                                                                                                                                                             |
|                               |                                                                                                                                                                                                                                                                                                                                                                                                                                                  |

SCHOLARONE™  
Manuscripts

# Association between alcohol consumption and impaired work performance (presenteeism): A systematic review

Mikkel Magnus Thørrisen<sup>1\*</sup>

Tore Bonsaksen<sup>1,2</sup>

Neda Hashemi<sup>3</sup>

Ingvild Kjekken<sup>1,4</sup>

Willem van Mechelen<sup>5,6,7,8,9</sup>

Randi Wågø Aas<sup>1,3,10</sup>

<sup>1</sup> Department of Occupational Therapy, Prosthetics and Orthotics, Faculty of Health Sciences, OsloMet – Oslo Metropolitan University, Oslo, Norway

<sup>2</sup> Faculty of Health Studies, VID Specialized University, Sandnes, Norway

<sup>3</sup> Department of Public Health, Faculty of Health Sciences, University of Stavanger, Stavanger, Norway

<sup>4</sup> National Advisory Unit on Rehabilitation in Rheumatology, Diakonhjemmet Hospital, Oslo, Norway

<sup>5</sup> Amsterdam University Medical Centers, Location VUmc, Department of Public and Occupational Health and Amsterdam Public Health Research Institute, Amsterdam, the Netherlands

<sup>6</sup> Center of Human Movement Sciences, University Medical Center Groningen and University of Groningen, Groningen, the Netherlands

<sup>7</sup> School of Human Movement and Nutrition Sciences, Faculty of Health and Behavioural Sciences, University of Queensland, Brisbane, Australia

<sup>8</sup> Department of Human Biology, Faculty of Health Sciences, University of Cape Town, South Africa

<sup>9</sup> School of Public Health, Physiotherapy and Population Sciences, University College Dublin, Dublin, Ireland

<sup>10</sup> Presenter – Making Sense of Science, Stavanger, Norway

\* Corresponding author: Mikkel Magnus Thørrisen. Postal address: OsloMet – Oslo Metropolitan University, Faculty of Health Sciences, Department of Occupational Therapy, Prosthetics and Orthotics, PO box 4 St. Olavs plass, NO-0130, Oslo, Norway.

Email: [mikkel-magnus.thorrisen@oslomet.no](mailto:mikkel-magnus.thorrisen@oslomet.no)

Telephone: +47 466 34 758

Word count: 5164

## ABSTRACT

**Objective:** The aim of this review was to explore the notion of alcohol-related presenteeism, i.e., whether evidence in the research literature supports an association between employee alcohol consumption and impaired work performance. **Methods:** Literature searches were performed in seven scientific databases, and in reference lists. Observational studies, published 1990 or later, in peer-reviewed scientific journals in English or a Scandinavian language, were included. Tested associations in the included studies were quality assessed, and analysed with frequency tables, cross tabulations and chi square tests of independence.

**Results:** Twenty-six studies, containing 132 tested associations, met the eligibility criteria. The vast majority of tested associations (77 %) indicated that higher levels of alcohol consumption were associated with higher levels of impaired work performance, and these positive associations were considerably more likely than negative associations to be statistically significant. Alcohol exposure measured by hangover episodes and composite instruments were overrepresented among significant positive associations of moderate and high quality. Overall, 61 % of the tested associations were characterised by low quality.

**Implications:** Workplace interventions aimed at improving employee productivity and health could benefit from integrating an awareness of a possible relationship between alcohol consumption and impaired work performance. **Conclusions:** Evidence does provide some support for the notion of alcohol-related presenteeism. However, due to low research quality and lack of longitudinal designs, evidence should be characterised as inconclusive. More robust and less heterogeneous research is warranted.

*Key words:* Alcohol consumption; Presenteeism; Work performance; Sick leave; Employees; Workplace interventions; Workplace health promotion

### Strengths and limitations of this study

- To the best of our knowledge, this is the first systematic review to exclusively explore evidence for the notion of alcohol-related presenteeism, i.e., whether evidence supports a possible association between alcohol consumption and impaired work performance.
- Twenty-six studies from 15 countries, containing 132 tested associations between alcohol consumption and work performance, met the eligibility criteria. The majority of tested associations indicated that higher levels of alcohol consumption were associated with impaired work performance. However, evidence was largely characterised by low quality and a large number of associations not reaching statistical significance.
- Due to the heterogeneous nature of the included data, we were not able to conduct meta-analyses.
- Future research on alcohol-related presenteeism should utilise more robust study designs, include potential mediating and moderating variables, and employ measurement instruments with satisfactory psychometric properties.

## INTRODUCTION

### Alcohol consumption

Excessive alcohol consumption is a major risk factor for disease, disability and mortality, and has been identified as a causal agent in more than 200 disease and injury conditions.[1] Higher alcohol consumption has been found to be associated with lowered life expectancy,[2] and, according to the World Health Organization,[3] harmful alcohol consumption is related to approximately three million annual deaths globally. Among the population aged 15 to 49 years, alcohol has been identified as the leading risk factor for death and disability-adjusted life-years.[4] Alcohol is by far the most used and misused psychoactive substance in the workforce,[5] and one to three out of ten employees can be characterised as risky drinkers in need for interventions,[6-9] i.e., having a consumption pattern that increases the risk for social-, legal-, medical-, occupational-, domestic- and economic problems.[10]

Alcohol can affect mood as well as cognitive and psychomotor performance. Psychopharmacological and experimental workplace simulation studies have explored effects of alcohol intoxication on performance, generally suggesting little consistent impairment at low to moderate intoxication levels (blood alcohol content (BAC) 0.01 % - 0.08 %), while at higher BAC levels ( $\geq 0.09$  %) impairment seems to increase quite linearly with task complexity.[11-14] Hangover episodes, i.e., an adverse mental and physical state experienced after heavy drinking when the BAC level returns to zero,[5, p. 85] include symptoms that may be related to performance decrements, such as headache, nausea, drowsiness, and sensitivity to light/sound.[12, 15, 16]

Alcohol consumption may influence activity performance in a variety of domains, including the occupational sphere. Regarding employees' alcohol consumption, one may distinguish between workforce overall alcohol consumption (consumption regardless of context) and work-related alcohol consumption (consumption prior to or during the workday,

1  
2  
3 as well as in contexts directly related to the work environment or the employment  
4  
5 relationship).[5, 17-19] According to Frone's integrative conceptual model of employee  
6  
7 substance use and productivity, not showing up at work (absenteeism) and arriving late at  
8  
9 work (tardiness) are primarily believed to be affected by off-the-job drinking, while leaving  
10  
11 work early and reduced work performance are thought mainly to be due to on-the-job  
12  
13 drinking.[5, 20] However, the model does allow for possible cross-over effects between  
14  
15 contexts. Off-the-job drinking "may indirectly affect performance outcomes to the extent that  
16  
17 it causes off-the-job substance impairment, which when carried into the workplace becomes  
18  
19 workplace impairment".[5, p.134] An association between employees' alcohol consumption  
20  
21 and absenteeism is quite well established in the literature, e.g.,[21], while alcohol-related  
22  
23 presenteeism stand out as a far more under-researched topic.  
24  
25  
26  
27  
28  
29  
30

### 31 **Presenteeism**

32  
33 Presenteeism has been defined in a variety of ways and the concept somewhat suffers from  
34  
35 a "definitional creep".[22, p.521] Two distinct traditions in presenteeism research have been  
36  
37 identified.[22, 23] The first tradition has primarily emphasised the exploration of  
38  
39 presenteeism determinants and studied presenteeism as a chosen behaviour or personal  
40  
41 choice. In this perspective, presenteeism is defined as the act of "showing up for work even  
42  
43 when one is ill",[22, p.519] or "the phenomenon of people who, despite complaints and ill  
44  
45 health that should prompt rest and absence from work, are still turning up at their jobs".[24,  
46  
47 p.503] Hence, presenteeism may be conceived as an alternative to absenteeism and, as such,  
48  
49 even as a health-promoting measure within a return to work framework.[25] The second  
50  
51 tradition has been more oriented towards consequences of this behaviour, in particular related  
52  
53 to productivity loss. Researchers in this tradition have defined presenteeism as "decreased on-  
54  
55 the-job performance due to the presence of health problems",[26, p.548] "the health-related  
56  
57  
58  
59  
60

1  
2  
3 productivity loss while at paid work",[27, p. 351] or "the measurable extent to which health  
4 symptoms, conditions and diseases adversely affect the work productivity of individuals who  
5 choose to remain at work".[28, p. 2] Evidently, the first tradition treats presenteeism as a  
6 behaviour, regardless of its consequences, while the second tradition claims that adverse  
7 performance outcomes are inherent in the conceptualisation of presenteeism.  
8  
9  
10  
11  
12  
13

14 It is plausible to conceive that a variety of health conditions do not result in productivity  
15 impairment and, in an organisational perspective, it may be argued that situations in which  
16 employees attend work while sick become of interest primarily when performance decrements  
17 are involved. In this systematic review, we understand presenteeism as reduced on-the-job  
18 performance due to health problems.[26] As such, presenteeism constitutes a link between on-  
19 the-job productivity and employee health,[26] addressing the grey area between optimal work  
20 performance and the absence of productivity (i.e., absenteeism).[22] Within this frame,  
21 alcohol-related presenteeism can be conceptualised as the presence of a positive association  
22 between alcohol consumption and impaired work performance (or conversely as a negative  
23 association between alcohol consumption and work performance). Alcohol-related  
24 presenteeism is thus operationalised as the product of a relationship between two variables  
25 (exposure: alcohol consumption, outcome: work performance) rather than a single variable  
26 (attending work while sick), rendering it possible to retain the notion of work performance as  
27 inherent in the phenomenon of presenteeism without conflating cause and effect.  
28  
29  
30  
31  
32  
33  
34  
35  
36  
37  
38  
39  
40  
41  
42  
43  
44  
45

46 Absenteeism and presenteeism have been found to be moderately correlated, and related by  
47 baseline presenteeism being a risk factor for future absenteeism.[29] Several authors have  
48 argued that presenteeism may carry more substantial societal costs than absenteeism. Hemp  
49 stated that "the illnesses people take with them to work (...) usually account for a greater loss  
50 in productivity because they are so prevalent, so often go untreated, and typically occur  
51  
52  
53  
54  
55  
56  
57  
58  
59  
60



1  
2  
3 during peak working years. Those indirect costs have long been largely invisible to  
4  
5 employers".[30, p. 2]  
6

7  
8 Known predictors of presenteeism include diseases and disorders (e.g., musculoskeletal  
9  
10 problems, depression and anxiety), certain individual characteristics (e.g., gender, age, job  
11  
12 satisfaction, stress and family status), and factors related to the organisational environment  
13  
14 (e.g., employment security, work schedules, workload, managerial support, corporate culture  
15  
16 and leadership style).[23] Knowledge of mechanisms underlying presenteeism is, however,  
17  
18 still quite limited. In particular, the impact of individual health risks or combinations of risks  
19  
20 should be researched more extensively.[26]  
21  
22  
23  
24  
25

## 26 **Rationale and aim**

27  
28 Some studies have explored alcohol-related presenteeism, either directly or indirectly.  
29  
30 There is, however, a lack of synthesised knowledge, rendering it difficult to assess the  
31  
32 evidence of a possible association between employee alcohol consumption and work  
33  
34 performance. In their review of relationships between psychological, physical and behavioural  
35  
36 health and work performance, Ford et al. found alcohol consumption to be weakly associated  
37  
38 with work performance problems.[31] However, this conclusion was based solely on 12  
39  
40 studies identified in two scientific databases in 2011. It seems imperative to generate new  
41  
42 accumulated knowledge in order to aid in deciding whether and how workplace interventions  
43  
44 and Workplace Health Promotion Programs (WHPP) should include an emphasis on alcohol  
45  
46 consumption.  
47  
48  
49

50  
51 The aim of this review was to explore whether evidence in the research literature supports  
52  
53 the notion of alcohol-related presenteeism, i.e., whether evidence supports an association  
54  
55 between alcohol consumption and impaired work performance.  
56  
57  
58  
59  
60

## METHODS

### Protocol and registration

This review is registered in the International prospective register of systematic reviews (PROSPERO, ID: CRD42017059620), and is part of the Norwegian national WIRUS project (Workplace Interventions preventing Risky Use of alcohol and Sick leave). Original research from the WIRUS project is published elsewhere.[9, 19, 32]

### Eligibility criteria

Studies exploring alcohol-related presenteeism, i.e., the relationship between alcohol consumption (exposure) and work performance (outcome) among employees (population) were included in this review. Included studies had to satisfy the following criteria: (i) *type of study* (observational study, e.g., case-control, prospective cohort or cross-sectional study); (ii) *type of participants* (the study reported results from a sample of employees, defined as all salaried persons between 16 and 70 years of age, both workers and managers, regardless of employment sector or branch); (iii) *type of measures/tests* (the study reported one or more statistical test(s) of a relationship between a measure of alcohol consumption and a measure of work performance); (iv) *type of publication and language* (the study was reported as a full text empirical research article published in English or a Scandinavian language in a peer-reviewed scientific journal); and (v) *time* (the study was published year 1990 or later).

Studies were excluded if they (i) reported results from samples in which employees were mixed with other groups (e.g., full-time students, unemployed), unless results were reported independently for each group, and/or (ii) reported tests where alcohol and/or work performance were analysed in combination with other factors (e.g., if on-the-job performance was analysed in combination with absenteeism within a wider productivity variable).

## Literature search

A primary database search strategy (based on a Medline structure) was developed and applied in seven scientific databases (Medline; Web of Science; PsycINFO; Cinahl; Amed; Embase; Swemed+). Where necessary, the search strategy was adapted to each database. The primary (Medline) strategy comprised a total of 29 steps, of which 18 were abstract-level text searches, 7 were based on MeSH terms (Medical Subject Headings, Topics, or similar terms), and the remaining were combinations of results applying Boolean operators (OR; AND). First, studies relating to the population (employees) were searched for (employee\*; employed; worker\*; workforce; work [MeSH]; employment [MeSH]), followed by studies relating to the exposure (alcohol consumption) (alcohol\*; drink\*; drunk\*; hangover; "hang over"; alcohol drinking [MeSH]; binge drinking [MeSH]; drinking behavior [MeSH]), and the outcome (work performance) (presenteeism; "job productiv\*"; "work productiv\*"; "job capacity"; "work capacity"; "job ability"; "work ability"; "job impair\*"; "work impair\*"; presenteeism [MeSH]; work performance [MeSH]). Finally, search blocks for population, exposure and outcome were combined.

No restrictions were imposed at the search stage. The primary search strategy was pilot tested by three reviewers prior to conducting the main searches. Databases were initially searched in September 2017. An updated search was conducted in October 2018. Additionally, reference lists in included studies were hand searched for potential relevant studies.

## Study and data selection

After searching the seven databases, hand searching in reference lists in included studies and removing duplicates, identified studies were screened for relevance on a title/abstract level. For quality assurance of the search strategy and eligibility criteria, the first 20 studies

1  
2  
3 were independently screened by three reviewers. The remaining studies were independently  
4 screened by two reviewers. Initial disagreements on eligibility were resolved through  
5 discussion. The reviewers reached consensus. Hence, it was not necessary to consult with a  
6 third reviewer. Potentially relevant studies were independently assessed in full text format for  
7 eligibility by two reviewers. Initial disagreements were resolved through discussion, without  
8 the need for consulting a third reviewer.  
9

10  
11  
12 Data from the included studies (study characteristics and outcome data) were extracted  
13 independently by two reviewers by utilising data extraction forms. Disagreements were  
14 resolved through discussion, without the need to consult a third reviewer.  
15  
16

## 17 **Quality assessment**

18  
19  
20 Searches indicated that studies fulfilling the inclusion criteria were characterised by  
21 different designs, and by containing several statistical associations between alcohol  
22 consumption and presenteeism. Included studies were characterised by exploring broader  
23 aims related to health and productivity, while this review emphasises the relationship between  
24 alcohol and work performance in particular. Hence, it was deemed inappropriate to conduct  
25 overall quality assessment of each study. Instead, relevant tested associations in the included  
26 studies were assessed on two key domains: (i) sample size (low quality = <500; moderate  
27 quality = 500-999; high quality =  $\geq 1000$ ), and (ii) risk of confounding (level of adjustment:  
28 low quality = unadjusted or unclear; moderate quality = adjusted for individual *or* work-  
29 related/environmental factor(s); high quality = adjusted for individual *and* work-  
30 related/environmental factors). Each association was ascribed an overall quality judgement  
31 (low, moderate or high) based on the assessment of the two key domains, according to the  
32 "worst score counts" algorithm recommended by the COSMIN guidelines.[33] Hence, an  
33 association's overall score was equal to its lowest domain assessment. High-quality  
34  
35  
36  
37  
38  
39  
40  
41  
42  
43  
44  
45  
46  
47  
48  
49  
50  
51  
52  
53  
54  
55  
56  
57  
58  
59  
60

1  
2  
3 associations were thus characterised by being based on at least 1000 observations and being  
4  
5 adjusted for individual (e.g., gender; age; personality; disease conditions; drug use) as well as  
6  
7 work-related/environmental factors (e.g., work position; work schedule; job characteristics).  
8  
9

10 The quality assessment procedure was pilot tested on a random sample of 10 associations.  
11  
12 Quality assessments were performed independently by two reviewers. Consensus was reached  
13  
14 and initial disagreements were resolved through discussion, without the need for consulting a  
15  
16 third reviewer.  
17  
18  
19  
20  
21

## 22 **Analysis**

23  
24 Measures of exposure (alcohol consumption) as well as measures of outcome (work  
25  
26 performance) displayed considerable heterogeneity between the included studies. As a result  
27  
28 of the heterogeneous nature of the included data, meta-analyses were deemed inappropriate.  
29  
30 Included data (associations) were instead analysed with frequency tables and cross  
31  
32 tabulations. First, associations were sorted into a frequency table by quality level and overall  
33  
34 association characteristics. Next, four contingency tables were constructed in order to explore  
35  
36 properties of the identified associations more thoroughly: (i) direction and significance, (ii)  
37  
38 quality and direction, (iii) publication year and quality, and (iv) significance and quality. The  
39  
40 four 2x2 tables were analysed by means of odds ratios (with 95 % confidence intervals) and  
41  
42 chi square tests of independence (with phi coefficients). Finally, measurements of alcohol  
43  
44 consumption and work performance applied in the included studies were categorised into  
45  
46 subgroups.  
47  
48  
49  
50  
51  
52  
53  
54  
55

## 56 **Patient and public involvement**

57  
58  
59 No patients or public were involved in this review study.  
60

## RESULTS

### Overview of the evidence

Searches in the seven databases resulted in 540 articles (Medline: n = 135; Web of Science: n = 128; PsycINFO: n = 63; Cinahl: n = 22; Amed: n = 3; Embase: n = 189; Swemed+: n = 0). Hand searching in reference lists resulted in an additional nine articles. After duplicate removal (n = 282), a total of 267 unique articles remained. Application of the eligibility criteria resulted in exclusion of 158 studies, leaving 109 potentially relevant articles.

Eighty-three studies were excluded after being subjected to full text assessment. The vast majority of these were excluded as a result of not reporting a statistical test of an association between alcohol consumption and work performance (n = 52), or because of publication type (n = 24). Articles not reporting tests of associations were typically characterised by (i) not studying variables that conceptually could be defined as alcohol consumption and/or work performance, and (ii) analysing alcohol consumption and/or work performance in combination with other factors, rendering it impossible to isolate the association of interest. Alcohol being analysed in combination with smoking/other lifestyle factors, and work performance being analysed in combination with absenteeism constitute typical examples. Articles excluded on the basis of publication type were typically conference papers. The study selection process resulted in 26 studies satisfying all inclusion criteria, and is presented in Figure 1.

[Figure 1 about here]

1  
2  
3 The 26 included studies were based on data from 92 730 employees from a total of 15  
4 countries (Australia, China, Czech republic, Denmark, Finland, Greece, Ireland, Japan, the  
5 Netherlands, Norway, Portugal, Slovenia, Sweden, Switzerland and the USA). Employees in  
6 the USA constituted the samples in half of the studies (13 of 26). The vast majority of studies  
7 (21 of 26) were based on cross-sectional research designs. A total of 132 associations between  
8 alcohol consumption and work performance were tested in the 26 included studies.  
9  
10 Characteristics of the included studies are presented in Table 1. Characteristics of the included  
11 associations are presented in Supplementary File 1.  
12  
13  
14  
15  
16  
17  
18  
19  
20  
21  
22  
23  
24  
25  
26  
27  
28  
29  
30  
31  
32  
33  
34  
35  
36  
37  
38  
39  
40  
41  
42  
43  
44  
45  
46  
47  
48  
49  
50  
51  
52  
53  
54  
55  
56  
57  
58  
59  
60

Table 1

*Characteristics of the included studies (n = 26) with measurements and included associations (n = 132)*

| Article/study (author, reference, year,) | Sample                                | Design          | Alcohol measures                                 | Presenteeism measures                                 | Included association(s) (n, ID) |
|------------------------------------------|---------------------------------------|-----------------|--------------------------------------------------|-------------------------------------------------------|---------------------------------|
| Adler <i>et al.</i> ,[34] 2011           | USA: Military veterans (n = 473)      | Cross-sectional | Binge drinking episodes past 3 months            | Work Limitations Questionnaire (WLQ)                  | n = 10 ([1-10])                 |
| Airilia <i>et al.</i> ,[35] 2012         | Finland: Fire fighters (n = 403)      | Longitudinal    | Drinking frequency                               | Work Ability Index (WAI), subdimensions               | n = 6 ([11-16])                 |
| Fisher <i>et al.</i> ,[36] 2000          | USA: Military personnel (n = 5389)    | Cross-sectional | Drinking frequency and quantity during past year | Number of impaired work ability days during past year | n = 7 ([17-23])                 |
| Karlsson <i>et al.</i> ,[37] 2010        | Sweden: Various occupations (n = 341) | Longitudinal    | Weekly alcohol intake (grams)                    | Prognosis of work ability, 6 months                   | n = 2 ([24],[25])               |
| Kessler & Frank,[38] 1997                | USA: Various occupations (n = 4091)   | Cross-sectional | DSM-III-R diagnosis (alcohol abuse/dependence)   | Number of work cutback days during past 30 days       | n = 2 ([26],[27])               |



|    |                                  |                                                                                        |                 |                                             |                                                                                   |                 |
|----|----------------------------------|----------------------------------------------------------------------------------------|-----------------|---------------------------------------------|-----------------------------------------------------------------------------------|-----------------|
| 1  |                                  |                                                                                        |                 |                                             |                                                                                   |                 |
| 2  |                                  |                                                                                        |                 |                                             |                                                                                   |                 |
| 3  | Kim <i>et al.</i> ,[39] 2013     | USA: Fibromyalgia patients in various occupations (n = 946)                            | Cross-sectional | Number of drinks per week                   | Fibromyalgia Impact Questionnaire (FIQ), item job ability                         | n = 8 ([28-35]) |
| 4  |                                  |                                                                                        |                 |                                             |                                                                                   |                 |
| 5  |                                  |                                                                                        |                 |                                             |                                                                                   |                 |
| 6  |                                  |                                                                                        |                 |                                             |                                                                                   |                 |
| 7  |                                  |                                                                                        |                 |                                             |                                                                                   |                 |
| 8  |                                  |                                                                                        |                 |                                             |                                                                                   |                 |
| 9  | Kirkham <i>et al.</i> ,[40] 2015 | USA: Computer manufacturer employees (n = 17089)                                       | Longitudinal    | CAGE questionnaire, at-risk vs. not at risk | Work Limitations Questionnaire (WLQ)                                              | n = 3 ([36-38]) |
| 10 |                                  |                                                                                        |                 |                                             |                                                                                   |                 |
| 11 |                                  |                                                                                        |                 |                                             |                                                                                   |                 |
| 12 |                                  |                                                                                        |                 |                                             |                                                                                   |                 |
| 13 |                                  |                                                                                        |                 |                                             |                                                                                   |                 |
| 14 |                                  |                                                                                        |                 |                                             |                                                                                   |                 |
| 15 |                                  |                                                                                        |                 |                                             |                                                                                   |                 |
| 16 |                                  |                                                                                        |                 |                                             |                                                                                   |                 |
| 17 | Odlaug <i>et al.</i> ,[41] 2016  | 8 European countries: Patients with alcohol dependence, various occupations (n = 2979) | Cross-sectional | Drinking amount, past 12 months             | Work Productivity and Activity Impairment Questionnaire (WPAI), presenteeism item | n = 1 ([39])    |
| 18 |                                  |                                                                                        |                 |                                             |                                                                                   |                 |
| 19 |                                  |                                                                                        |                 |                                             |                                                                                   |                 |
| 20 |                                  |                                                                                        |                 |                                             |                                                                                   |                 |
| 21 |                                  |                                                                                        |                 |                                             |                                                                                   |                 |
| 22 |                                  |                                                                                        |                 |                                             |                                                                                   |                 |
| 23 |                                  |                                                                                        |                 |                                             |                                                                                   |                 |
| 24 |                                  |                                                                                        |                 |                                             |                                                                                   |                 |
| 25 |                                  |                                                                                        |                 |                                             |                                                                                   |                 |
| 26 |                                  |                                                                                        |                 |                                             |                                                                                   |                 |
| 27 |                                  |                                                                                        |                 |                                             |                                                                                   |                 |
| 28 | Pensola <i>et al.</i> ,[42] 2016 | Finland: People with multisite pain, various occupations (n = 3884)                    | Cross-sectional | Hangover frequency, past 12 months          | Current work ability (0-10)                                                       | n = 8 ([40-47]) |
| 29 |                                  |                                                                                        |                 |                                             |                                                                                   |                 |
| 30 |                                  |                                                                                        |                 |                                             |                                                                                   |                 |
| 31 |                                  |                                                                                        |                 |                                             |                                                                                   |                 |
| 32 |                                  |                                                                                        |                 |                                             |                                                                                   |                 |
| 33 |                                  |                                                                                        |                 |                                             |                                                                                   |                 |
| 34 |                                  |                                                                                        |                 |                                             |                                                                                   |                 |
| 35 |                                  |                                                                                        |                 |                                             |                                                                                   |                 |
| 36 |                                  |                                                                                        |                 |                                             |                                                                                   |                 |
| 37 |                                  |                                                                                        |                 |                                             |                                                                                   |                 |
| 38 |                                  |                                                                                        |                 |                                             |                                                                                   |                 |
| 39 |                                  |                                                                                        |                 |                                             |                                                                                   |                 |
| 40 |                                  |                                                                                        |                 |                                             |                                                                                   |                 |
| 41 |                                  |                                                                                        |                 |                                             |                                                                                   |                 |
| 42 |                                  |                                                                                        |                 |                                             |                                                                                   |                 |
| 43 |                                  |                                                                                        |                 |                                             |                                                                                   |                 |
| 44 |                                  |                                                                                        |                 |                                             |                                                                                   |                 |
| 45 |                                  |                                                                                        |                 |                                             |                                                                                   |                 |
| 46 |                                  |                                                                                        |                 |                                             |                                                                                   |                 |

|    |                               |                      |                    |                       |                       |                   |
|----|-------------------------------|----------------------|--------------------|-----------------------|-----------------------|-------------------|
| 1  |                               |                      |                    |                       |                       |                   |
| 2  |                               |                      |                    |                       |                       |                   |
| 3  | Richmond <i>et al.</i> ,[43]  | USA: Government      | Quasi-experimental | Alcohol Use           | Workplace Outcome     | n = 1 ([48])      |
| 4  | 2016                          | employees (n = 344)  |                    | Disorders             | Suite, presenteeism   |                   |
| 5  |                               |                      |                    | Identification Test   | scale                 |                   |
| 6  |                               |                      |                    | (AUDIT)               |                       |                   |
| 7  |                               |                      |                    |                       |                       |                   |
| 8  |                               |                      |                    |                       |                       |                   |
| 9  |                               |                      |                    |                       |                       |                   |
| 10 | Schou <i>et al.</i> ,[44]     | Norway: Various      | Cross-sectional    | Drinking frequency    | Number of             | n = 1 ([49])      |
| 11 | 2017                          | occupations (n =     |                    |                       | presenteeism          |                   |
| 12 |                               | 1407)                |                    |                       | episodes, past 12     |                   |
| 13 |                               |                      |                    |                       | months                |                   |
| 14 |                               |                      |                    |                       |                       |                   |
| 15 |                               |                      |                    |                       |                       |                   |
| 16 |                               |                      |                    |                       |                       |                   |
| 17 |                               |                      |                    |                       |                       |                   |
| 18 | Steggmann <i>et al.</i> ,[45] | China: Cycle haulers | Cross-sectional    | Alcohol               | Supervisor's estimate | n = 1 ([50])      |
| 19 | 1997                          | (n = 45)             |                    | intake/intensity (ml) | of worker's           |                   |
| 20 |                               |                      |                    |                       | contribution          |                   |
| 21 |                               |                      |                    |                       |                       |                   |
| 22 |                               |                      |                    |                       |                       |                   |
| 23 |                               |                      |                    |                       |                       |                   |
| 24 | Tsuchiya <i>et al.</i> ,[46]  | Japan: Community     | Cross-sectional    | DSM-IV diagnosis      | WHO Health and        | n = 2 ([51],[52]) |
| 25 | 2012                          | workers (n = 530)    |                    | (alcohol              | Work Performance      |                   |
| 26 |                               |                      |                    | abuse/dependence)     | Questionnaire (HPQ)   |                   |
| 27 |                               |                      |                    |                       |                       |                   |
| 28 |                               |                      |                    |                       |                       |                   |
| 29 |                               |                      |                    |                       |                       |                   |
| 30 | van Scheppingen <i>et</i>     | Netherlands: Dairy   | Cross-sectional    | Weekly alcohol        | Presenteeism          | n = 1 ([53])      |
| 31 | <i>al.</i> ,[47] 2014         | company employees    |                    | intake                | frequency             |                   |
| 32 |                               | (n = 629)            |                    |                       |                       |                   |
| 33 |                               |                      |                    |                       |                       |                   |
| 34 |                               |                      |                    |                       |                       |                   |
| 35 |                               |                      |                    |                       |                       |                   |
| 36 |                               |                      |                    |                       |                       |                   |
| 37 |                               |                      |                    |                       |                       |                   |
| 38 |                               |                      |                    |                       |                       |                   |
| 39 |                               |                      |                    |                       |                       |                   |
| 40 |                               |                      |                    |                       |                       |                   |
| 41 |                               |                      |                    |                       |                       |                   |
| 42 |                               |                      |                    |                       |                       |                   |
| 43 |                               |                      |                    |                       |                       |                   |
| 44 |                               |                      |                    |                       |                       |                   |
| 45 |                               |                      |                    |                       |                       |                   |
| 46 |                               |                      |                    |                       |                       |                   |

|    |                                   |                                                        |                 |                                                     |                                                     |                    |
|----|-----------------------------------|--------------------------------------------------------|-----------------|-----------------------------------------------------|-----------------------------------------------------|--------------------|
| 1  |                                   |                                                        |                 |                                                     |                                                     |                    |
| 2  |                                   |                                                        |                 |                                                     |                                                     |                    |
| 3  | Yu <i>et al.</i> ,[48] 2015       | China: Petrochemical corporation employees (n = 1506)  | Cross-sectional | Current alcohol drinker (yes/no)                    | Presenteeism during past 4 weeks (yes/no)           | n = 2 ([54],[55])  |
| 4  |                                   |                                                        |                 |                                                     |                                                     |                    |
| 5  |                                   |                                                        |                 |                                                     |                                                     |                    |
| 6  |                                   |                                                        |                 |                                                     |                                                     |                    |
| 7  |                                   |                                                        |                 |                                                     |                                                     |                    |
| 8  |                                   |                                                        |                 |                                                     |                                                     |                    |
| 9  | Friedman <i>et al.</i> ,[49] 1992 | USA: Supermarket employees (n = 860)                   | Cross-sectional | DSM-III diagnosis alcohol abuse                     | Overall job performance (supervisor ratings)        | n = 14 ([56-69])   |
| 10 |                                   |                                                        |                 |                                                     |                                                     |                    |
| 11 |                                   |                                                        |                 |                                                     |                                                     |                    |
| 12 |                                   |                                                        |                 |                                                     |                                                     |                    |
| 13 |                                   |                                                        |                 |                                                     |                                                     |                    |
| 14 |                                   |                                                        |                 |                                                     |                                                     |                    |
| 15 | Boles <i>et al.</i> ,[50] 2004    | USA: Employees in a large national employer (n = 2264) | Cross-sectional | CAGE questionnaire, at-risk vs. not at risk         | WPAI; % presenteeism during past week               | n = 3 ([70-72])    |
| 16 |                                   |                                                        |                 |                                                     |                                                     |                    |
| 17 |                                   |                                                        |                 |                                                     |                                                     |                    |
| 18 |                                   |                                                        |                 |                                                     |                                                     |                    |
| 19 |                                   |                                                        |                 |                                                     |                                                     |                    |
| 20 |                                   |                                                        |                 |                                                     |                                                     |                    |
| 21 | Blum <i>et al.</i> ,[51] 1993     | USA: Employees, various occupations (n = 136)          | Cross-sectional | Monthly frequency x typical quantity (past 30 days) | Technical job performance                           | n = 12 ([73-84])   |
| 22 |                                   |                                                        |                 |                                                     |                                                     |                    |
| 23 |                                   |                                                        |                 |                                                     |                                                     |                    |
| 24 |                                   |                                                        |                 |                                                     |                                                     |                    |
| 25 |                                   |                                                        |                 |                                                     |                                                     |                    |
| 26 |                                   |                                                        |                 |                                                     |                                                     |                    |
| 27 | Burton <i>et al.</i> ,[52] 2005   | USA: Financial services employees (n = 28375)          | Cross-sectional | At-risk (>14/wk) vs no-risk drinking                | Work Limitations Questionnaire (WLQ), short version | n = 5 ([85-89])    |
| 28 |                                   |                                                        |                 |                                                     |                                                     |                    |
| 29 |                                   |                                                        |                 |                                                     |                                                     |                    |
| 30 |                                   |                                                        |                 |                                                     |                                                     |                    |
| 31 |                                   |                                                        |                 |                                                     |                                                     |                    |
| 32 |                                   |                                                        |                 |                                                     |                                                     |                    |
| 33 | Lim <i>et al.</i> ,[53] 2000      | Australia: Employees, various occupations (n = 4579)   | Cross-sectional | DSM-IV diagnosis alcohol abuse                      | Number of work cutback days past month              | n = 2 ([90], [91]) |
| 34 |                                   |                                                        |                 |                                                     |                                                     |                    |
| 35 |                                   |                                                        |                 |                                                     |                                                     |                    |
| 36 |                                   |                                                        |                 |                                                     |                                                     |                    |
| 37 |                                   |                                                        |                 |                                                     |                                                     |                    |
| 38 |                                   |                                                        |                 |                                                     |                                                     |                    |
| 39 |                                   |                                                        |                 |                                                     |                                                     |                    |
| 40 |                                   |                                                        |                 |                                                     |                                                     |                    |
| 41 |                                   |                                                        |                 |                                                     |                                                     |                    |
| 42 |                                   |                                                        |                 |                                                     |                                                     |                    |
| 43 |                                   |                                                        |                 |                                                     |                                                     |                    |
| 44 |                                   |                                                        |                 |                                                     |                                                     |                    |
| 45 |                                   |                                                        |                 |                                                     |                                                     |                    |
| 46 |                                   |                                                        |                 |                                                     |                                                     |                    |

|    |                                           |                      |                 |                         |                        |                      |
|----|-------------------------------------------|----------------------|-----------------|-------------------------|------------------------|----------------------|
| 1  |                                           |                      |                 |                         |                        |                      |
| 2  |                                           |                      |                 |                         |                        |                      |
| 3  | Lowmaster <i>et al.</i> , <sup>[54]</sup> | USA: Police officers | Cross-sectional | Personality             | Supervisor ratings of  | n = 3 ([92]-[94])    |
| 4  | 2012                                      | (n = 85)             |                 | Assessment              | overall job            |                      |
| 5  |                                           |                      |                 | Inventory, subscale     | performance            |                      |
| 6  |                                           |                      |                 | Alcohol Problems        |                        |                      |
| 7  |                                           |                      |                 | Scale (ALC)             |                        |                      |
| 8  |                                           |                      |                 |                         |                        |                      |
| 9  |                                           |                      |                 |                         |                        |                      |
| 10 |                                           |                      |                 |                         |                        |                      |
| 11 |                                           |                      |                 |                         |                        |                      |
| 12 | Moore <i>et al.</i> , <sup>[55]</sup>     | USA: Manufacturing   | Cross-sectional | CAGE questionnaire,     | Time at work spent     | n = 13 ([95]-[107])  |
| 13 | 2000                                      | company employees    |                 | at-risk vs. not at risk | goofing off            |                      |
| 14 |                                           | (n = 2279)           |                 |                         |                        |                      |
| 15 |                                           |                      |                 |                         |                        |                      |
| 16 |                                           |                      |                 |                         |                        |                      |
| 17 |                                           |                      |                 |                         |                        |                      |
| 18 | Ames <i>et al.</i> , <sup>[17]</sup>      | USA: Manufacturing   | Longitudinal    | Frequency drinking      | Frequency sleeping     | n = 14 ([108]-[121]) |
| 19 | 1997                                      | plant employees (n = |                 | before/during work      | on the job and         |                      |
| 20 |                                           | 832)                 |                 | and hangovers past      | task/co-worker         |                      |
| 21 |                                           |                      |                 | year                    | problems past year     |                      |
| 22 |                                           |                      |                 |                         |                        |                      |
| 23 |                                           |                      |                 |                         |                        |                      |
| 24 |                                           |                      |                 |                         |                        |                      |
| 25 |                                           |                      |                 |                         |                        |                      |
| 26 | Furu <i>et al.</i> , <sup>[56]</sup>      | Finland: Workers in  | Cross-sectional | Excessive drinking      | Current work ability   | n = 2 ([122], [123]) |
| 27 | 2018                                      | solvent-exposed      |                 | (AUDIT-C, scores 7-     | compared to lifetime   |                      |
| 28 |                                           | fields (n = 1622)    |                 | 12)                     | best (0-10)            |                      |
| 29 |                                           |                      |                 |                         |                        |                      |
| 30 |                                           |                      |                 |                         |                        |                      |
| 31 |                                           |                      |                 |                         |                        |                      |
| 32 | Aas <i>et al.</i> , <sup>[32]</sup>       | Norway: Employees,   | Cross-sectional | Drinking frequency      | Quantity               | n = 4 ([124]-[127])  |
| 33 | 2017                                      | various occupations  |                 | and binge drinking      | presenteeism during    |                      |
| 34 |                                           | (n = 3278)           |                 | past year (AUDIT 1,     | past 7 days (degree 0- |                      |
| 35 |                                           |                      |                 | 3)                      | 10)                    |                      |
| 36 |                                           |                      |                 |                         |                        |                      |
| 37 |                                           |                      |                 |                         |                        |                      |
| 38 |                                           |                      |                 |                         |                        |                      |
| 39 |                                           |                      |                 |                         |                        |                      |
| 40 |                                           |                      |                 |                         |                        |                      |
| 41 |                                           |                      |                 |                         |                        |                      |
| 42 |                                           |                      |                 |                         |                        |                      |
| 43 |                                           |                      |                 |                         |                        |                      |
| 44 |                                           |                      |                 |                         |                        |                      |
| 45 |                                           |                      |                 |                         |                        |                      |
| 46 |                                           |                      |                 |                         |                        |                      |

1  
2  
3  
4  
5  
6  
7  
8  
9  
10  
11  
12  
13  
14  
15  
16  
17  
18  
19  
20  
21  
22  
23  
24  
25  
26  
27  
28  
29  
30  
31  
32  
33  
34  
35  
36  
37  
38  
39  
40  
41  
42  
43  
44  
45  
46

|                                                   |                                  |                 |                                              |                                                       |                     |
|---------------------------------------------------|----------------------------------|-----------------|----------------------------------------------|-------------------------------------------------------|---------------------|
| van den Berg <i>et al.</i> , <sup>[57]</sup> 2017 | Netherlands: Health care workers | Cross-sectional | Excessive alcohol intake (>10 drinks a week) | Current work ability compared to lifetime best (0-10) | n = 5 ([128]-[132]) |
|---------------------------------------------------|----------------------------------|-----------------|----------------------------------------------|-------------------------------------------------------|---------------------|

---

For peer review only

### Quality of the included data

Ninety-three of the 132 associations (71 %) were based on samples smaller than 1000 employees. Approximately half of the associations were unadjusted ( $n = 63$ ; 48 %), while 29 associations (22 %) were adjusted for individual factors as well as for work-related/environmental factors. By applying the "worst score counts" algorithm, 80 associations (61 %) were judged as being of low quality, 38 associations (29 %) were of moderate quality, while 14 associations (11 %) were characterised by high quality. Results from quality assessment of the included associations are presented in Supplementary File 2.

### Direction, significance, quality and time

One-hundred-two of the 132 tested associations (77 %) indicated a positive relationship between alcohol consumption and work performance, i.e., implying that higher levels of consumption were associated with higher levels of performance impairment. Approximately half of these ( $n = 56$ , 55 %) were statistically significant. The majority of positive associations was judged to be of low quality ( $n = 70$ , 69 %), followed by moderate ( $n = 23$ , 22 %) and high quality ( $n = 9$ , 9 %).

Twenty-five of the 132 tested associations (19 %) indicated a negative relationship, i.e., implying that higher levels of alcohol consumption were associated with lower performance impairment (higher work performance). Only two of these associations were statistically significant, and both of these were of low quality. These two associations (ID66 and ID68, in Friedman *et al.*[49]) tested the relationship between duration of alcohol use and overall work performance, and found that longer duration, as opposed to shorter duration, was associated with higher work performance.

Five associations (4 %) were not possible to classify as either positive or negative. They were characterised by (i) finding no differences in work performance between compared

1  
2  
3 alcohol consumption groups (ID102 in Moore *et al.*[55]; ID130 in van den Berg *et al.*[57]);  
4  
5 (ii) by finding significant differences between multiple consumption groups, but without a  
6  
7 consistent positive/negative pattern (ID28 and ID29 in Kim *et al.*[39]); or (iii) by finding a J-  
8  
9 shaped pattern where abstainers scored comparable to moderate-level drinkers on impaired  
10  
11 performance (i.e., higher than low-level drinkers), but still lower than heavy drinkers (ID98 in  
12  
13 Moore *et al.*[55]). The identified associations, sorted by quality level and overall association  
14  
15 characteristics, are presented in Table 2.  
16  
17  
18  
19  
20  
21  
22  
23  
24  
25  
26  
27  
28  
29  
30  
31  
32  
33  
34  
35  
36  
37  
38  
39  
40  
41  
42  
43  
44  
45  
46  
47  
48  
49  
50  
51  
52  
53  
54  
55  
56  
57  
58  
59  
60

For peer review only

Table 2

Identified associations (n = 132) according to direction/significance and assessed quality level

| Quality level | Direction and significance of associations                                                                                                                                                     |                                               |                                                                                                                                                                  |                                                                   | Other <sup>c</sup> |
|---------------|------------------------------------------------------------------------------------------------------------------------------------------------------------------------------------------------|-----------------------------------------------|------------------------------------------------------------------------------------------------------------------------------------------------------------------|-------------------------------------------------------------------|--------------------|
|               | Significant positive <sup>a</sup> association                                                                                                                                                  | Significant negative <sup>b</sup> association | Non-significant positive association                                                                                                                             | Non-significant negative association                              |                    |
| Low           | [1],[2],[3],[4],[5],[10],[12],[17],[19],[26],[39],[49],[51],[54],[55],[56],[58],[59],[60],[62],[64],[67],[69],[77],[78],[81],[82],[83],[84],[95],[96],[97],[118],[119],[120],[121],[124],[125] | [66],[68]                                     | [6],[7],[8],[9],[11],[13],[14],[16],[18],[20],[21],[23],[25],[27],[48],[50],[53],[57],[61],[63],[65],[73],[74],[75],[76],[79],[80],[104],[107],[122],[131],[132] | [15],[22],[24],[92],[93],[94]                                     | [28],[130]         |
| Moderate      | [40],[42],[43],[44],[46],[47],[52],[101],[106],[109],[110],[115],[123]                                                                                                                         |                                               | [34],[35],[45],[91],[100],[103],[105],[117],[128],[129]                                                                                                          | [30],[31],[32],[33],[90],[99],[108],[111],[112],[113],[114],[116] | [29],[98],[102]    |
| High          | [36],[37],[38],[41],[127]                                                                                                                                                                      |                                               | [70],[71],[72],[126]                                                                                                                                             | [85],[86],[87],[88],[89]                                          |                    |

Note. Number in brackets = association ID; <sup>a</sup> Higher level of alcohol associated with higher level of presenteeism; <sup>b</sup> Lower level of alcohol associated with higher level of presenteeism, or higher level of alcohol associated with lower level of presenteeism; <sup>c</sup> Inconsistent direction, no relationship or J-shaped relationship between alcohol and presenteeism



1  
2  
3 Positive associations were considerably more likely than negative associations to be  
4 statistically significant (OR = 14.00, 95 % CI: 3.1 – 65.5;  $\chi^2$  (1, n = 127) = 17.80,  $p$  = .000,  $\phi$   
5 = .37). On the other hand, negative associations were less likely than positive associations to  
6 be of low quality (OR = 0.22, 95 % CI: 0.1 – 0.6;  $\chi^2$  (1, n = 127) = 11.37,  $p$  = .001,  $\phi$  = -.30).  
7  
8 Furthermore, recent studies ( $\geq$  year 2000) were more likely than older studies ( $<$  year 2000) to  
9 be of moderate or high quality (OR = 2.95, 95 % CI: 1.30 – 6.79;  $\chi^2$  (1, n = 132) = 6.96,  $p$   
10 = .008,  $\phi$  = .23). There was no significant relationship between whether associations were  
11 significant and whether they were of moderate/high or low quality. The four 2x2 contingency  
12 tables are presented in Table 3.  
13  
14  
15  
16  
17  
18  
19  
20  
21  
22  
23  
24  
25  
26  
27  
28  
29  
30  
31  
32  
33  
34  
35  
36  
37  
38  
39  
40  
41  
42  
43  
44  
45  
46  
47  
48  
49  
50  
51  
52  
53  
54  
55  
56  
57  
58  
59  
60

Table 3

*Crosstabulations of included associations according to direction, significance, quality and publication year*

| <b>Direction</b>                                   |                        |                   | <b>Direction</b>                                        |                   |                 |
|----------------------------------------------------|------------------------|-------------------|---------------------------------------------------------|-------------------|-----------------|
| <b>Significance</b>                                | Positive % (n)         | Negative % (n)    | <b>Quality</b>                                          | Positive % (n)    | Negative % (n)  |
| Significant                                        | 54.9 (56)              | 8.0 (2)           | Moderate/high                                           | 31.4 (32)         | 68.0 (17)       |
| Non-significant                                    | 45.1 (46)              | 92.0 (23)         | Low                                                     | 68.6 (70)         | 32.0 (8)        |
| OR= 14.00*** (3.130 – 65.53)                       |                        |                   | OR = 0.22** (0.08 – 0.55)                               |                   |                 |
| $\chi^2 (1, n = 127) = 17.80, p = .000, phi = .37$ |                        |                   | $\chi^2 (1, n = 127) = 11.37, p = .001, phi = -.30$     |                   |                 |
| <b>Publication year</b>                            |                        |                   | <b>Significance</b>                                     |                   |                 |
| <b>Quality</b>                                     | $\geq$ year 2000 % (n) | < year 2000 % (n) | <b>Quality</b>                                          | Significant % (n) | Non-sign. % (n) |
| Moderate/high                                      | 47.2 (42)              | 23.3 (10)         | Moderate/high                                           | 32.8 (20)         | 44.9 (31)       |
| Low                                                | 52.8 (47)              | 76.7 (33)         | Low                                                     | 67.2 (41)         | 55.1 (38)       |
| OR= 2.95** (1.30 – 6.70)                           |                        |                   | OR= 0.60 <sup>ns</sup> (0.29 – 1.22)                    |                   |                 |
| $\chi^2 (1, n = 132) = 6.96, p = .008, phi = .23$  |                        |                   | $\chi^2 (1, n = 130) = 2.00, p = .157^{ns}, phi = -.12$ |                   |                 |

OR = odds ratio, with 95% confidence interval;  $\chi^2$  = chi square test of independence, with phi coefficient; \*\*  $p < .01$ ; \*\*\*  $p < .001$ ; ns = non-significant

## Measurements of alcohol consumption and work performance

Categorisation of the applied measurements of alcohol consumption in the 26 included studies revealed eight subgroups: (i) consumption status (e.g., current alcohol drinker (yes/no), applied in Yu *et al.*[48]); (ii) drinking frequency (e.g., number of times drunk during past three months, applied in Ames *et al.*[17]; typical frequency of alcohol consumption during past year, applied in Aas *et al.*[32]); (iii) drinking intensity (e.g., average number of alcohol drinks during the past week, applied in Adler *et al.*[34]); (iv) drinking volume (e.g., monthly frequency x typical quantity during past 30 days, applied in Blum *et al.*[51]); (v) binge drinking (e.g., binge drinking (6 or more drinks on a single occasion) frequency during past year, applied in Aas *et al.*[32]); (vi) hangover (e.g., frequency of hangover episodes at work during past year, applied in Ames *et al.*[17]); (vii) composite instruments comprising several aspects of consumption, such as frequency, intensity and alcohol problems (e.g., the Alcohol Use Disorders Identification Test,[10] applied in Richmond *et al.*[43]); and (viii) alcohol-related diagnosis (e.g., DSM-IV diagnosis of alcohol abuse, applied in Lim *et al.*[53]).

The 26 included studies contained a total of six work performance measurement categories: (i) overall work performance/impairment (e.g., supervisor ratings of overall work performance, applied in Lowmaster *et al.*[54]; self-reported current work performance compared to lifetime best, applied in Furu *et al.*[56]; Work Limitations Questionnaire sum score,[58] applied in Kirkham *et al.*[40]); (ii) domain-specific work performance/impairment (e.g., Work Limitations Questionnaire subscale Time management,[58] applied in Adler *et al.*[34]); (iii) impaired performance quantity (e.g., number of days working below a normal level of performance during past 12 months, applied in Fisher *et al.*[36]; estimated percent impaired performance during past week, applied in Boles *et al.*[50]); (iv) impaired performance frequency (e.g., frequency of impaired performance episodes during past 12

1  
2  
3 months, applied in Schou *et al.*[44]); (v) prognosis of work performance (e.g., self-assessed  
4 probability of good work performance within frame of 6 months, applied in Karlsson *et*  
5 *al.*[37]); and (vi) work performance status (e.g., impaired work performance during past 4  
6 weeks (yes/no), applied in Yu *et al.*[48]). The identified associations, sorted according to  
7 measurements of alcohol consumption and work performance, are presented in Table 4.  
8  
9  
10  
11  
12  
13  
14  
15  
16  
17  
18  
19  
20  
21  
22  
23  
24  
25  
26  
27  
28  
29  
30  
31  
32  
33  
34  
35  
36  
37  
38  
39  
40  
41  
42  
43  
44  
45  
46  
47  
48  
49  
50  
51  
52  
53  
54  
55  
56  
57  
58  
59  
60

For peer review only

Table 4  
Identified associations (n = 132) according to measurements of alcohol consumption and work performance

| Alcohol measure                | Work performance measure                                                                                                                                                                                                                                                                                                      |                                                                                                                                                                     |                                                                                                                                                                                                                                               |                                                    |                                           |
|--------------------------------|-------------------------------------------------------------------------------------------------------------------------------------------------------------------------------------------------------------------------------------------------------------------------------------------------------------------------------|---------------------------------------------------------------------------------------------------------------------------------------------------------------------|-----------------------------------------------------------------------------------------------------------------------------------------------------------------------------------------------------------------------------------------------|----------------------------------------------------|-------------------------------------------|
|                                | Overall work performance/impairment                                                                                                                                                                                                                                                                                           | Domain-specific work performance/impairment                                                                                                                         | Impaired performance, quantity                                                                                                                                                                                                                | Impaired performance, frequency                    | Prognosis work performance                |
| Consumption status             | [66↓*],[67↑*]                                                                                                                                                                                                                                                                                                                 |                                                                                                                                                                     |                                                                                                                                                                                                                                               |                                                    | [54↑*],[55↑*]                             |
| Frequency                      | [11↓ <sup>ns</sup> ],[12↑*],[14↑ <sup>ns</sup> ],[15↓ <sup>ns</sup> ],[58↑*],[59↑*]                                                                                                                                                                                                                                           |                                                                                                                                                                     | [108↓ <sup>ns</sup> ],[109↑*],[124↑*],[126↑ <sup>ns</sup> ]                                                                                                                                                                                   | [49↑*],[113↓ <sup>ns</sup> ],[114↓ <sup>ns</sup> ] | [13↑ <sup>ns</sup> ],[16↑ <sup>ns</sup> ] |
| Quantity                       | [10↑*],[28↓*],[29 <sup>ns</sup> ],[30↓ <sup>ns</sup> ],[31↓ <sup>ns</sup> ],[32↓ <sup>ns</sup> ],[33↓ <sup>ns</sup> ],[34↑ <sup>ns</sup> ],[35↑ <sup>ns</sup> ],[39↑*],[50↑ <sup>ns</sup> ],[85↓ <sup>ns</sup> ],[128↑ <sup>ns</sup> ],[129↑ <sup>ns</sup> ],[130 <sup>ns</sup> ],[131↑ <sup>ns</sup> ],[132↑ <sup>ns</sup> ] | [6↑ <sup>ns</sup> ],[7↑ <sup>ns</sup> ],[8↑ <sup>ns</sup> ],[9↑ <sup>ns</sup> ],[86↓ <sup>ns</sup> ],[87↓ <sup>ns</sup> ],[88↓ <sup>ns</sup> ],[89↓ <sup>ns</sup> ] |                                                                                                                                                                                                                                               | [53↑ <sup>ns</sup> ]                               | [24↓ <sup>ns</sup> ],[25↑ <sup>ns</sup> ] |
| Volume                         | [62↑*],[63↑ <sup>ns</sup> ],[68↓*],[69↑*],[73↑ <sup>ns</sup> ],[74↑ <sup>ns</sup> ],[75↑ <sup>ns</sup> ],[76↑ <sup>ns</sup> ],[77↑*],[78↑*],[79↑ <sup>ns</sup> ],[80↑ <sup>ns</sup> ],[81↑*],[82↑*],[83↑*],[84↑*]                                                                                                             |                                                                                                                                                                     | [17↑*],[18↑ <sup>ns</sup> ],[19↑*],[20↑ <sup>ns</sup> ],[21↑ <sup>ns</sup> ],[22↓ <sup>ns</sup> ],[23↑ <sup>ns</sup> ],[111↓ <sup>ns</sup> ]                                                                                                  | [116↓ <sup>ns</sup> ]                              |                                           |
| Heavy episodic/ binge drinking | [5↑*]                                                                                                                                                                                                                                                                                                                         | [1↑*],[2↑*],[3↑*],[4↑*]                                                                                                                                             | [112↓ <sup>ns</sup> ],[125↑*],[127↑*]                                                                                                                                                                                                         | [117↑ <sup>ns</sup> ]                              | [118↑*]                                   |
| Hangover episodes              | [40↑*],[41↑*],[42↑*],[43↑*],[44↑*],[45↑ <sup>ns</sup> ],[46↑*],[47↑*]                                                                                                                                                                                                                                                         |                                                                                                                                                                     | [110↑*]                                                                                                                                                                                                                                       | [115↑*]                                            | [119↑*],[120↑*],[121↑*]                   |
| Composite instruments          | [36↑*],[37↑*],[38↑*],[48↑ <sup>ns</sup> ],[64↑*],[65↑ <sup>ns</sup> ],[92↓ <sup>ns</sup> ],[93↓ <sup>ns</sup> ],[94↓ <sup>ns</sup> ],[122↑ <sup>ns</sup> ],[123↑*]                                                                                                                                                            |                                                                                                                                                                     | [70↑ <sup>ns</sup> ],[72↑ <sup>ns</sup> ],[95↑*],[96↑*],[97↑*],[98↑*],[99↓ <sup>ns</sup> ],[100↑ <sup>ns</sup> ],[101↑*],[102 <sup>ns</sup> ],[103↑ <sup>ns</sup> ],[104↑ <sup>ns</sup> ],[105↑ <sup>ns</sup> ],[106↑*],[107↑ <sup>ns</sup> ] |                                                    | [71↑ <sup>ns</sup> ]                      |
| Diagnosis                      | [51↑*],[52↑*],[56↑*],[57↑ <sup>ns</sup> ],[60↑*],[61↑ <sup>ns</sup> ]                                                                                                                                                                                                                                                         |                                                                                                                                                                     | [26↑*],[27↑ <sup>ns</sup> ],[90↓ <sup>ns</sup> ],[91↑ <sup>ns</sup> ]                                                                                                                                                                         |                                                    |                                           |

Number in brackets = association ID; assessed quality level indicated by typeface: italic=low, regular=moderate, bold=high; ↑=positive association; ↓=negative association; | =association in non-consistent direction; \*significant association; <sup>ns</sup>non-significant association

1  
2  
3 1 In the 132 included associations, the most frequently applied alcohol measurement was  
4  
5 2 drinking intensity (n = 28, 21 %) and composite instruments (n = 27, 20 %). Overall work  
6  
7 3 performance/impairment (n = 67, 51 %) and quantity of impaired performance (n = 35, 27 %)  
8  
9 4 were the most frequently utilised work performance measures. When exploring the group of  
10  
11 5 associations characterised by being significant positive and of moderate or high quality (n =  
12  
13 6 18), the vast majority of these (n = 15) applied either hangover (n = 9) or composite  
14  
15 7 instruments (n = 6) as alcohol consumption measures.  
16  
17  
18  
19  
20  
21  
22

## 9 DISCUSSION

10 The aim of this review was to explore whether evidence in the research literature supports  
11 the notion of alcohol-related presenteeism, i.e., whether evidence supports an association  
12 between employee alcohol consumption and work performance. Twenty-six studies,  
13 containing a total of 132 tested associations between alcohol consumption and presenteeism,  
14 based on data from 92 730 employees in 15 countries, met the eligibility criteria.

15 The vast majority of the associations (102 of 132, 77 %) indicated a positive relationship  
16 between alcohol consumption and impaired work performance, i.e., implying that higher  
17 levels of alcohol consumption were associated with higher levels of impaired performance.  
18 Furthermore, positive associations were considerably more likely than negative associations  
19 to be statistically significant. Among the included studies in this review, positive associations  
20 between alcohol consumption and impaired work performance were identified in a variety of  
21 employee samples, e.g., computer manufacturer employees in the USA (Kirkham *et al.*[40]),  
22 Finnish employees with multisite pain in various occupations (Pensola *et al.*[42]), Japanese  
23 community workers (Tsuchiya *et al.*[46]), and manufacturing plant employees in the USA  
24 (Ames *et al.*[17]).

1  
2  
3 1 Alcohol use has the potential for influencing cognitive and psychomotor performance,  
4  
5 2 which may explain why employees' alcohol consumption is associated with work  
6  
7 3 performance. In particular, hangover episodes are characterised by symptoms that can induce  
8  
9 4 work impairments (headache, nausea, drowsiness etc.),[12, 15, 16] and alcohol intoxication,  
10  
11 5 at least at higher blood alcohol content, may produce work impairments that increase linearly  
12  
13 6 with task complexity.[11-14] Positive associations between alcohol consumption and  
14  
15 7 performance impairments are not so surprising in light of knowledge on the relationship  
16  
17 8 between alcohol consumption and absenteeism. In their review, Schou and Moan found that  
18  
19 9 employees' consumption was positively associated with both short-term and long-term sick  
20  
21 10 leave.[21] The complementary hypothesis of the relationship between absenteeism and  
22  
23 11 presenteeism claims that these behaviours are both related to employees' overall health status  
24  
25 12 and that they are positively associated.[23] Research has demonstrated moderate positive  
26  
27 13 correlations between absenteeism and presenteeism and that presenteeism may be a risk factor  
28  
29 14 for future absenteeism.[23, 29]

30  
31  
32  
33  
34  
35 15 Alcohol measurements based on hangovers and composite instruments were  
36  
37 16 overrepresented in associations characterised by being significant positive and of moderate or  
38  
39 17 high quality. Hangovers tend to result from binge drinking episodes, or drinking shortly  
40  
41 18 before work. Such short-term impairment-producing consumption may be more predictive of  
42  
43 19 work impairments than for instance typical drinking frequency, which instead may be more  
44  
45 20 predictive of long-term ill-health consequences.[59] Composite instruments, such as the  
46  
47 21 Alcohol Disorders Identification Test,[10] tend to assume a more complex relationship  
48  
49 22 between alcohol, health and performance than what may be the case for more basic  
50  
51 23 measurements (e.g., drinking frequency or intensity). Hence, a composite instrument  
52  
53 24 measuring both consumption and experienced alcohol problems may be more predictive of  
54  
55 25 productivity outcomes such as work performance.

1  
2  
3 1 However, the majority of positive associations were judged to be of low quality, and 25 of  
4  
5 2 132 associations (19 %) even indicated a negative relationship, i.e., implying that higher  
6  
7 3 levels of alcohol consumption were associated with lower performance impairments (higher  
8  
9 4 performance). Moreover, five associations were inconsistent, i.e., not possible to classify as  
10  
11 5 positive or negative, or did not reveal any association between alcohol consumption and work  
12  
13 6 performance at all. Negative associations were less likely than positive associations to be of  
14  
15 7 low quality.

18  
19 8 The relationship between alcohol consumption and health outcomes has, in some studies,  
20  
21 9 been described as a J-shaped curve where low to moderate consumption is associated with  
22  
23 10 better health outcomes than non-drinking.[60] In their study of manufacturing company  
24  
25 11 employees in the USA, Moore et al. found a J-shaped relationship between alcohol  
26  
27 12 consumption and percentage of time at work spent goofing off.[55] In this study, abstainers  
28  
29 13 scored higher on goof-off time than low-moderate drinkers but lower than heavy drinkers. It  
30  
31 14 is, however, somewhat unclear whether low-moderate levels of alcohol consumption in fact  
32  
33 15 have some protective effects or whether such findings are products of confounding.[4, 60, 61]  
34  
35 16 Nevertheless, potential curvilinear relationships between alcohol consumption and health  
36  
37 17 outcomes may contribute to explain why a considerable proportion of associations failed to  
38  
39 18 demonstrate significant positive relationships. Moreover, on-the-job performance outcomes  
40  
41 19 may be more directly affected by on-the-job drinking than by off-the-job drinking, even  
42  
43 20 though off-the-job consumption may translate into workplace impairment.[5] Among the  
44  
45 21 studies included in this review, only one (Ames *et al.*[17]) contained explicit measures of on-  
46  
47 22 the-job drinking, while the remaining studies measured overall consumption (consumption  
48  
49 23 regardless of context). Moreover, overall consumption may have differential impact on  
50  
51 24 different domains. In a study of employees in Norway, Aas *et al.*[32] found that overall  
52  
53 25 consumption demonstrated stronger associations with performance impairments outside the  
54  
55  
56  
57  
58  
59  
60



1  
2  
3 1 workplace compared to work performance, which may be due to employees moderating (self-  
4  
5 2 regulating) their behaviour at work as a result of potential sanctions from employers. Self-  
6  
7 3 regulatory motivations and mechanisms may contribute to hide alcohol-related presenteeism,  
8  
9 4 which may complicate the exploration of associations between alcohol consumption and work  
10  
11 5 performance.  
12  
13  
14  
15  
16

## 17 **Implications**

18  
19 8 Overall, this review does provide some support for the notion of alcohol-related  
20  
21 9 presenteeism, i.e., that employee alcohol consumption may be associated with performance  
22  
23 10 decrements at work. Workplace interventions aimed at improving employee productivity and  
24  
25 11 health could benefit from integrating an awareness of such a possible relationship.  
26  
27

28 12 However, it is not possible to draw firm conclusions regarding the relationship between  
29  
30 13 alcohol consumption and work performance. Based on research identified in this review, one  
31  
32 14 cannot plausibly conclude that alcohol consumption constitutes a risk factor for impaired  
33  
34 15 work performance. The majority of identified evidence was of low quality as a result of low  
35  
36 16 power (small sample sizes) and/or risk of confounding. Moreover, the majority of identified  
37  
38 17 studies were cross-sectional, and thereby unable to draw causal inferences about the  
39  
40 18 relationship between exposure and outcome. Above all, this review implies the need for  
41  
42 19 further research. First, future research would benefit from studying alcohol-related  
43  
44 20 presenteeism by means of more robust study designs that better enable exploration of causal  
45  
46 21 mechanisms (e.g., case-control and cohort studies), as well as by including potential  
47  
48 22 mediating and moderating variables. Second, both alcohol consumption and presenteeism are  
49  
50 23 conceptualised and measured very differently across studies. Such heterogeneity makes it  
51  
52 24 difficult to explore findings in the literature by means of meta-analyses. Progress in the field  
53  
54 25 seems to hinge on researchers' ability to reach more agreement on how to conceptualise these  
55  
56  
57  
58  
59  
60

1 variables and measure them by utilising instruments with satisfactory psychometric  
2 properties. This seems particularly true for the concept of presenteeism. According to an  
3 expert panel from the American College of Occupational and Environmental Medicine,[27, p.  
4 351] productivity instruments should be supported by scientific evidence, be applicable to the  
5 specific work setting, support decision making, and be practical. Based on their review of  
6 measurement properties and quality of presenteeism instruments, Ospina *et al.*[62] concluded  
7 that the following three instruments were most strongly supported by evidence: The Stanford  
8 Presenteeism Scale (6-item version;[63]), the Endicott Work Productivity Scale (EWPS;[64]),  
9 and the Health and Work Questionnaire (HWQ;[65]). Regarding measurement of alcohol  
10 consumption, future research could benefit from differentiating between overall consumption  
11 (e.g., measured with a composite instrument such as the Alcohol Use Disorders Identification  
12 Test;[10]), hangover episodes, on-the-job drinking and off-the-job drinking. By employing  
13 such distinctions, researchers would be better able to explore a potential correspondence  
14 between consumption contexts, impairment contexts and performance outcomes.[5, 20]

## 16 **Methodological considerations**

17 This review has some limitations. First and foremost, due to the heterogeneous nature of  
18 the identified data, we were unable to perform meta-analyses on the included data.

19 Second, it may be considered a limitation that this review utilised associations and not  
20 studies as the unit of interest. Associations were deemed the appropriate unit of interest in this  
21 review for two reasons: (i) included studies were characterised by exploring broader aims  
22 related to health and productivity, while this review specifically aimed at exploring the  
23 relationship between alcohol consumption and work performance, and (ii) in several studies,  
24 multiple associations between alcohol consumption and work performance were tested (often  
25 with different measures and subgroups within each study).

1  
2  
3 1 Third, this review did not utilise a previously validated critical appraisal tool (CAT) for  
4  
5 2 assessment of included primary research. One reason for this is that studies based on different  
6  
7 3 study designs were included in the review. At present, there exists no generic gold standard  
8  
9 4 CAT for application across study designs.[66, 67] A second reason is that the current review  
10  
11 5 emphasised associations rather than studies as the unit of interest. Hence, it was deemed more  
12  
13 6 appropriate to develop a parsimonious and conservative quality assessment system in which  
14  
15 7 each association was evaluated based on power (sample size) and risk of confounding (level  
16  
17 8 of adjustment). Deliberately, we chose a conservative approach to quality assessment by  
18  
19 9 ascribing each association an overall score in accordance with the "worst score counts"  
20  
21 10 algorithm. Such an approach is in line with the COSMIN guidelines.[33]  
22  
23

24  
25  
26 11 Fourth, we chose to utilise the concept of presenteeism in line with researchers who define  
27  
28 12 it in terms of decreased on-the-job productivity due to health problems.[26] Such an  
29  
30 13 understanding does ascribe valence to the phenomenon, i.e., a behaviour contributing to lost  
31  
32 14 productivity that may carry negative influence on the overall work environment.[68] We are,  
33  
34 15 however, aware of differing opinions among scholars regarding conceptualisations of  
35  
36 16 presenteeism. Different definitions have different strengths and weaknesses. According to  
37  
38 17 Johns,[22] a proper definition should (i) neither ascribe motives nor consequences to  
39  
40 18 presenteeism, and (ii) avoid conflating cause and effect by perceiving productivity loss itself  
41  
42 19 as presenteeism. To some extent, we do agree with such objections against a productivity-  
43  
44 20 based definition. A more open understanding, such as simply "showing up for work even  
45  
46 21 when one is ill",[22, p. 519] does not ascribe a certain valence to the phenomenon, nor does it  
47  
48 22 presuppose or exclude any particular consequence. We believe, however, that in a  
49  
50 23 socioeconomic and organisational perspective, situations in which employees attend work  
51  
52 24 while ill become of interest primarily when performance decrements are in fact involved. In  
53  
54 25 order to avoid conflating cause and effect, we operationalised alcohol-related presenteeism as  
55  
56  
57  
58  
59  
60

1 the product of a relationship between two measurable variables, i.e., alcohol consumption  
2 (predictor/exposure) and work performance (outcome).

## CONCLUSIONS

5 Alcohol-related presenteeism (impaired work performance associated with alcohol  
6 consumption) stands out as an important but under-researched topic in the research literature.  
7 According to this review, evidence does provide some support for the notion that employee  
8 alcohol consumption may be associated with impaired work performance. However, due to  
9 low research quality and lack of longitudinal designs, existing evidence should still be  
10 characterised as inconclusive regarding the prevalence, nature and impact of alcohol-related  
11 presenteeism in the workforce. More robust and less heterogeneous research is warranted.

## DECLARATIONS

### Contributors

15 RWA is the principal investigator and project manager of the WIRUS project. This review  
16 study was designed by MMT and RWA. MMT analysed the data and drafted the manuscript.  
17 Data selection was performed by MMT, NH and RWA; data extraction by MMT and TB; and  
18 quality assessment by MMT and IK. TB, NH, IK WVM and RWA provided scientific input to  
19 the different drafts and provided data interpretation. All authors made critical revisions and  
20 provided intellectual content to the manuscript, approved the final version to be published,  
21 and agreed to be accountable for all aspects of this work.

### Funding

1  
2  
3 1 The review study is funded by the Norwegian Directorate of Health and the Research  
4  
5 2 Council of Norway. The funding bodies had no role in the design of the review or in data  
6  
7 3 analysis or interpretation.  
8  
9  
10 4

### 11 5 **Competing interests**

12  
13  
14 6 None declared.  
15  
16  
17 7

### 18 8 **Availability of data and materials**

19  
20  
21 9 Data from the review study are available from the project owner (University of Stavanger,  
22  
23 10 Faculty of Health Sciences, Department of Public Health, Research group Societal  
24  
25 11 Participation in School and Work) by principal investigator and project manager Randi Wågø  
26  
27 12 Aas on reasonable request.  
28  
29  
30  
31  
32

## 33 14 **SUPPLEMENTARY FILES**

34  
35 15 **Supplementary File 1:** Results of quality assessment of included associations (PDF)  
36  
37 16

38  
39  
40 17 **Supplementary File 2:** Characteristics of tested associations in included studies (PDF)  
41  
42 18  
43  
44 19  
45  
46 20  
47  
48 21  
49  
50 22  
51  
52 23  
53  
54 24  
55  
56 25  
57  
58  
59  
60

## REFERENCES

1. Lim SS, Vos T, Flaxman AD, *et al*. A comparative risk assessment of burden of disease and injury attributable to 67 risk factors and risk factor clusters in 21 regions, 1990–2010: a systematic analysis for the Global Burden of Disease Study 2010. *Lancet* 2012;**380**:2224-60.doi:10.1016/S0140-6736(12)61766-8
2. Wood AM, Kaptoge S, Butterworth AS, *et al*. Risk thresholds for alcohol consumption: combined analysis of individual-participant data for 599 912 current drinkers in 83 prospective studies. *Lancet* 2018;**391**:1513-23.doi:10.1016/S0140-6736(18)30134-X
3. World Health Organization. Global status report on alcohol and health 2018. Geneva, Switzerland: World Health Organization 2018.
4. Griswold MG, Fullman N, Hawley C, *et al*. Alcohol use and burden for 195 countries and territories, 1990–2016: a systematic analysis for the Global Burden of Disease Study 2016. *Lancet* 2018;**392**:1015-35.doi:10.1016/S0140-6736(18)31310-2
5. Frone MR. Alcohol and illicit drug use in the workforce and workplace. Washington, DC: American Psychological Association 2013.
6. Howland J, Mangione T, Kuhlthau K, *et al*. Work-site variation in managerial drinking. *Addiction* 1996;**91**:1007-17.doi:10.1046/j.1360-0443.1996.91710077.x
7. Kawakami N, Haratani T, Hemmi T, *et al*. Prevalence and demographic correlates of alcohol-related problems in Japanese employees. *Soc Psych Psych Epid* 1992;**27**(4):198-202.doi:10.1007/bf00789006
8. Marchand A, Parent-Lamarche A, Blanc ME. Work and high-risk alcohol consumption in the Canadian workforce. *Int J Env Res Pub He* 2011;**8**(7):2692-705.doi:10.3390/ijerph8072692
9. Thørrisen MM, Skogen JC, Aas RW. The associations between employees' risky drinking and sociodemographics, and implications for intervention needs. *BMC Public Health* 2018;**18**.doi:10.1186/s12889-018-5660-x
10. Babor TF, Higgins-Biddle JC, Saunders JB, *et al*. AUDIT: The alcohol use disorders identification test. Guidelines for use in primary health care. Geneva, Switzerland: World Health Organization 2001.
11. Glencross DJ. Alcohol and human performance. *Drug Alcohol Rev* 1990;**9**:111-8.doi:10.1080/09595239000185161
12. Martin CS. Measuring acute alcohol impairment. In: Karch SB, editor. Drug abuse handbook. 2nd ed. New York, NY: CRC Press 2007. p. 316-33.
13. Price DL, Liddle RJ. The effect of alcohol on a manual arc welding task. *Weld J* 1982;**61**:15-9.
14. Streufert S, Pogash R, Roache J, *et al*. Alcohol and managerial performance. *J Stud Alcohol* 1994;**55**:230-8.

- 1  
2  
3  
4 1  
5 2 15. Prat G, Adan A, Pérez-Pàmies M, *et al.* Neurocognitive effects of alcohol hangover.  
6 3 *Addict Behav* 2008;**33**:15-23.doi:10.1016/j.addbeh.2007.05.002  
7 4  
8 5 16. Verster JC. The alcohol hangover: A puzzling phenomenon. *Alcohol Alcoholism*  
9 6 2008;**43**:124-6.doi:10.1093/alcalc/agm163  
10 7  
11 8 17. Ames GM, Grube JW, Moore RS. The relationship of drinking and hangovers to  
12 9 workplace problems: An empirical study. *J Stud Alcohol* 1997;**58**:37-  
13 10 47.doi:10.15288/jsa.1997.58.37  
14 11  
15 12 18. Mangione TW, Howland J, Amick B, *et al.* Employee drinking practices and work  
16 13 performance. *J Stud Alcohol* 1999;**60**:261-70.  
17 14  
18 15 19. Nordaune K, Skarpaas LS, Sagvaag H, *et al.* Who initiates and organises situations for  
19 16 work-related alcohol use? The WIRUS culture study. *Scand J Public Health* 2017;**45**:749-  
20 17 56.doi:10.1177/1403494817704109  
21 18  
22 19 20. Frone MR. Alcohol, drugs, and workplace safety outcomes: A view from a general model  
23 20 of employee substance use and productivity. In: Barling J, Frone MR, editors. *The*  
24 21 *psychology of workplace safety*. Washington, DC: American Psychological Association 2004.  
25 22 p. 127-56.  
26 23  
27 24 21. Schou L, Moan IS. Alcohol use–sickness absence association and the moderating role of  
28 25 gender and socioeconomic status: A literature review. *Drug Alcohol Rev* 2016;**35**:158-  
29 26 69.doi:10.1111/dar.12278  
30 27  
31 28 22. Johns G. Presenteeism in the workplace: A review and research agenda. *J Organ Behav*  
32 29 2010;**31**:519-42.doi:10.1002/job.630  
33 30  
34 31 23. Gosselin E, Lemyre L, Corneil W. Presenteeism and absenteeism: Differentiated  
35 32 understanding of related phenomena. *J Occup Health Psych* 2013;**18**:75-  
36 33 86.doi:10.1037/a0030932  
37 34  
38 35 24. Aronsson G, Gustafsson K, Dallner M. Sick but yet at work. An empirical study of sickness  
39 36 presenteeism. *J Epidemiol Commun H* 2000;**54**:502-9.  
40 37  
41 38 25. Lau B, Dye AH, Aarseth S. Lederes erfaringer med oppfølging av sykmeldte [Managers'  
42 39 experiences with follow-up of employees on sick leave]. *Tidsskrift for Norsk*  
43 40 *psykologforening* 2018;**56**:586-97.  
44 41  
45 42 26. Schultz A, Edington D. Employee health and presenteeism: A systematic review. *J Occup*  
46 43 *Rehabil* 2007;**17**:547-79.doi:10.1007/s10926-007-9096-x  
47 44  
48 45 27. Loeppke R, Hymel PA, Lofland JH, *et al.* Health-related workplace productivity  
49 46 measurement: General and migraine-specific recommendations from the ACOEM expert  
50 47 panel. *J Occup Environ Med* 2003;**45**:349-59.doi:10.1097/01.jom.0000063619.37065.e2  
51 48  
52 49 28. Chapman LS. Presenteeism and its role in worksite health promotion. *Am J Health*  
53 50 *Promot* 2005;**19**:1-8.  
54 51  
55 52  
56 53  
57 54  
58 55  
59 56  
60 57



- 1  
2  
3  
4 1  
5 2 29. Skagen K, Collins AM. The consequences of sickness presenteeism on health and  
6 3 wellbeing over time: A systematic review. *Soc Sci Med* 2016;**161**:169-  
7 4 77.doi:10.1016/j.socscimed.2016.06.005  
8 5  
9 6 30. Hemp P. Presenteeism: At work - but out of it. *Harvard Bus Rev* 2004;**82**:49-58.  
10 7  
11 8 31. Ford MT, Cerasoli CP, Higgins JA, *et al.* Relationships between psychological, physical,  
12 9 and behavioural health and work performance: A review and meta-analysis. *Work Stress*  
13 10 2011;**25**:185-204.doi:10.1080/02678373.2011.609035  
14 11  
15 12 32. Aas RW, Haveraaen L, Sagvaag H, *et al.* The influence of alcohol consumption on  
16 13 sickness presenteeism and impaired daily activities. The WIRUS screening study. *PLoS ONE*  
17 14 2017;**12**:e0186503.doi:10.1371/journal.pone.0186503  
18 15  
19 16 33. Terwee C, Mokkink L, Knol D, *et al.* Rating the methodological quality in systematic  
20 17 reviews of studies on measurement properties: A scoring system for the COSMIN checklist.  
21 18 *Qual Life Res* 2012;**21**:651-7.doi:10.1007/s11136-011-9960-1  
22 19  
23 20 34. Adler DA, Possemato K, Mavandadi S, *et al.* Psychiatric status and work performance of  
24 21 veterans of Operations Enduring Freedom and Iraqi Freedom. *Psychiat Serv* 2011;**62**:39-  
25 22 46.doi:10.1176/appi.ps.62.1.39  
26 23  
27 24 35. Airila A, Hakanen J, Punakallio A, *et al.* Is work engagement related to work ability  
28 25 beyond working conditions and lifestyle factors? *Int Arch Occ Env Hea* 2012;**85**:915-  
29 26 25.doi:10.1007/s00420-012-0732-1  
30 27  
31 28 36. Fisher CA, Hoffman KJ, Austin-Lane J, *et al.* The relationship between heavy alcohol use  
32 29 and work productivity loss in active duty military personnel: A secondary analysis of the 1995  
33 30 Department of Defense Worldwide Survey. *Mil Med* 2000;**165**:355-  
34 31 61.doi:10.1093/milmed/165.5.355  
35 32  
36 33 37. Karlsson N, Skargren E, Kristenson M. Emotional support predicts more sickness absence  
37 34 and poorer self assessed work ability: A two-year prospective cohort study. *BMC Public*  
38 35 *Health* 2010;**10**:648.doi:10.1186/1471-2458-10-648  
39 36  
40 37 38. Kessler RC, Frank RG. The impact of psychiatric disorders on work loss days. *Psychol*  
41 38 *Med* 1997;**27**:861-73.doi:10.1017/s0033291797004807  
42 39  
43 40 39. Kim CH, Vincent A, Clauw DJ, *et al.* Association between alcohol consumption and  
44 41 symptom severity and quality of life in patients with fibromyalgia. *Arthritis Research and*  
45 42 *Therapy* 2013;**15**:R42.doi:10.1186/ar4200  
46 43  
47 44 40. Kirkham HS, Clark BL, Bolas CA, *et al.* Which modifiable health risks are associated  
48 45 with changes in productivity costs? *Popul Health Manag* 2015;**18**:30-  
49 46 8.doi:10.1089/pop.2014.0033  
50 47  
51 48 41. Odlaug B, Gual A, DeCourcy J, *et al.* Alcohol dependence, co-occurring conditions and  
52 49 attributable burden. *Alcohol Alcoholism* 2016;**51**:201-9.doi:10.1093/alcalc/aggv088  
53 50  
54 50



- 1  
2  
3 1 42. Pensola T, Haukka E, Kaila-Kangas L, *et al*. Good work ability despite multisite  
4 2 musculoskeletal pain? A study among occupationally active Finns. *Scand J Public Health*  
5 3 2016;**44**:300-10.doi:10.1177/1403494815617087  
6 4  
7 4  
8 5 43. Richmond MK, Pampel FC, Wood RC, *et al*. Impact of employee assistance services on  
9 6 depression, anxiety, and risky alcohol use a quasi-experimental study. *J Occup Environ Med*  
10 7 2016;**58**:641-50.doi:10.1097/jom.0000000000000744  
11 8  
12 9 44. Schou L, Moan IS, Storvoll E. Attitudes toward alcohol-related sickness absence and  
13 10 presenteeism: differences across subgroups of the population? *J Subst Use* 2017;**22**:225-  
14 11 31.doi:10.1037/t61699-000  
15 12  
16 13 45. Steegmann AT, Li TL, Hewner SJ, *et al*. The China productivity project: Results and  
17 14 conclusions. *Am J Phys Anthropol* 1997;**103**:295-313.doi:10.1002/(sici)1096-  
18 15 8644(199707)103:3<295::aid-ajpa1>3.0.co;2-q  
19 16  
20 17 46. Tsuchiya M, Kawakami N, Ono Y, *et al*. Impact of mental disorders on work performance  
21 18 in a community sample of workers in Japan: The World Mental Health Japan Survey 2002-  
22 19 2005. *Psychiat Res* 2012;**198**:140-5.doi:10.1016/j.psychres.2011.10.014  
23 20  
24 21 47. van Scheppingen AR, de Vroome EM, ten Have KC, *et al*. Motivations for health and  
25 22 their associations with lifestyle, work style, health, vitality, and employee productivity. *J*  
26 23 *Occup Env Med* 2014;**56**:540-6.doi:10.1097/jom.0000000000000143  
27 24  
28 25 48. Yu J, Wang S, Yu X. Health risk factors associated with presenteeism in a Chinese  
29 26 enterprise. *Occup Med-C* 2015;**65**:732-8.doi:10.1093/occmed/kqv115  
30 27  
31 28 49. Friedman AS, Granick S, Utada A, *et al*. Drug use/abuse and supermarket workers' job  
32 29 performance. *Employee Assistance Quarterly* 1992;**7**:17-34.doi:10.1300/j022v07n04\_02  
33 30  
34 31 50. Boles M, Pelletier B, Lynch W. The relationship between health risks and work  
35 32 productivity. *J Occup Environ Med* 2004;**46**:737-  
36 33 45.doi:10.1097/01.jom.0000131830.45744.97  
37 34  
38 35 51. Blum TC, Roman PM, Martin JK. Alcohol consumption and work performance. *J Stud*  
39 36 *Alcohol* 1993;**54**:61-70.doi:10.15288/jsa.1993.54.61  
40 37  
41 38 52. Burton NW, Chen CY, Conti DJ, *et al*. The association of health risks with on-the-job  
42 39 productivity. *J Occup Environ Med* 2005;**47**:769-  
43 40 77.doi:10.1097/01.jom.0000169088.03301.e4  
44 41  
45 42 53. Lim D, Sanderson K, Andrews G. Lost productivity among full-time workers with mental  
46 43 disorders. *J Ment Health Policy* 2000;**3**:139-46.doi:10.1002/mhp.93  
47 44  
48 45 54. Lowmaster SE, Morey LC. Predicting law enforcement officer job performance with the  
49 46 Personality Assessment Inventory. *J Pers Assess* 2012;**94**:254-  
50 47 61.doi:10.1080/00223891.2011.648295  
51 48  
52  
53  
54  
55  
56  
57  
58  
59  
60

- 1  
2  
3 1 55. Moore S, Grunberg L, Greenberg E. The relationships between alcohol problems and  
4 2 well-being, work attitudes, and performance: Are they monotonic? *J Subst Abuse*  
5 3 2000;**11**:183-204.doi:10.1016/s0899-3289(00)00020-1  
6 4
- 7 4  
8 5 56. Furu H, Sainio M, Hyvärinen HK, *et al.* Work ability score of solvent-exposed workers.  
9 6 *Int Arch Occ Env Hea* 2018;**91**:559-69.doi:10.1007/s00420-018-1306-7  
10 7
- 11 8 57. van den Berg S, Burdorf A, Robroek SJW. Associations between common diseases and  
12 9 work ability and sick leave among health care workers. *Int Arch Occ Env Hea* 2017;**90**:685-  
13 10 93.doi:10.1007/s00420-017-1231-1  
14 11
- 15 12 58. Lerner D, Amick BC, Rogers WH, *et al.* The Work Limitations Questionnaire. *Med Care*  
16 13 2001;**39**:72-85.doi:10.1097/00005650-200101000-00009  
17 14  
18 15  
19 16 59. Bacharach SB, Bamberger P, Biron M. Alcohol consumption and workplace absenteeism:  
20 17 The moderating effect of social support. *J Appl Psychol* 2010;**92**:334-  
21 18 48.doi:10.1037/a0018018  
22 19  
23 20 60. Grønbaek M. The positive and negative health effects of alcohol- and the public health  
24 21 implications. *J Intern Med* 2009;**265**:407-20.doi:10.1111/j.1365-2796.2009.02082.x  
25 22  
26 23 61. Skog OJ. Public health consequences of the J-curve hypothesis of alcohol problems.  
27 24 *Addiction* 1996;**91**:325-37.doi:10.1111/j.1360-0443.1996.tb02283.x  
28 25  
29 26 62. Ospina MB, Dennett L, Wayne A, *et al.* A systematic review of measurement properties of  
30 27 instruments assessing presenteeism. *Am J Manag Care* 2015;**21**:171-85.  
31 28  
32 29 63. Koopman C, Pelletier KR, Murray JF, *et al.* Stanford Presenteeism Scale: Health status  
33 30 and employee productivity. *J Occup Environ Med* 2002;**44**:14-20.doi:10.1097/00043764-  
34 31 200201000-00004  
35 32  
36 33 64. Endicott J, Nee J. Endicott Work Productivity Scale (EWPS): A new measure to assess  
37 34 treatment effects. *Psychopharmacol Bull* 1997;**33**:13-6.  
38 35  
39 36 65. Shikiar R, Halpern MT, Rentz AM, *et al.* Development of the Health and Work  
40 37 Questionnaire (HWQ): An instrument for assessing workplace productivity in relation to  
41 38 worker health. *Work* 2004;**22**:219-29.  
42 39  
43 40 66. Crowe M, Sheppard L. A review of critical appraisal tools show they lack rigor:  
44 41 Alternative tool structure is proposed. *J Clin Epidemiol* 2011;**64**:79-  
45 42 89.doi:10.1016/j.jclinepi.2010.02.008  
46 43  
47 44 67. Sanderson S, Tatt ID, Higgins JPT. Tools for assessing quality and susceptibility to bias in  
48 45 observational studies in epidemiology: A systematic review and annotated bibliography. *Int J*  
49 46 *Epidemiol* 2007;**36**:666-76.doi:10.1093/ije/dym018  
50 47  
51 48 68. Lack DM. Presenteeism revisited. A comprehensive review. *AAOHN J* 2011;**59**:77-  
52 49 89.doi:10.3928/08910162-20110201-02  
53 50  
54 51  
55 52  
56 53  
57 54  
58 55  
59 56  
60 57

1  
2  
3  
4  
5  
6  
7  
8  
9  
10  
11  
12  
13  
14  
15  
16  
17  
18  
19  
20  
21  
22  
23  
24  
25  
26  
27  
28  
29  
30  
31  
32  
33  
34  
35  
36  
37  
38  
39  
40  
41  
42  
43  
44  
45  
46  
47  
48  
49  
50  
51  
52  
53  
54  
55  
56  
57  
58  
59  
60

1 FIGURE TITLE/LEGEND

2 *Figure 1.* PRISMA flow chart of the study selection process

For peer review only

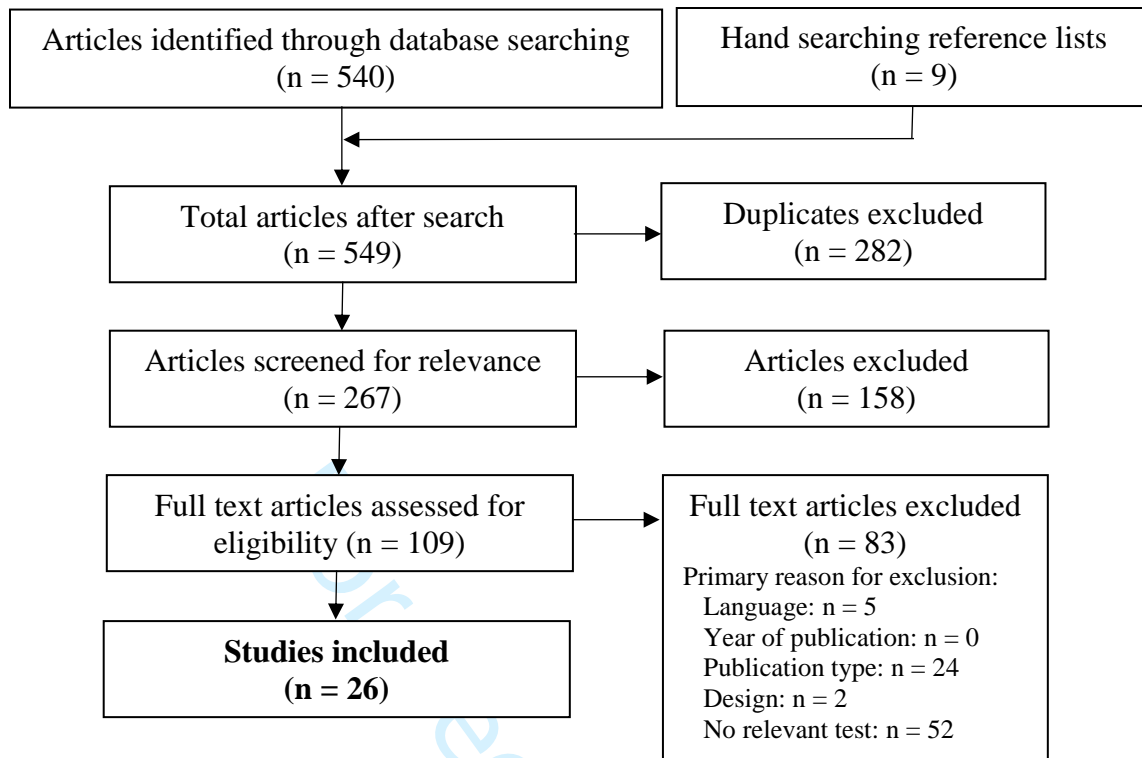

**Supplementary File 1.** Results of quality assessment of included associations (n = 132)

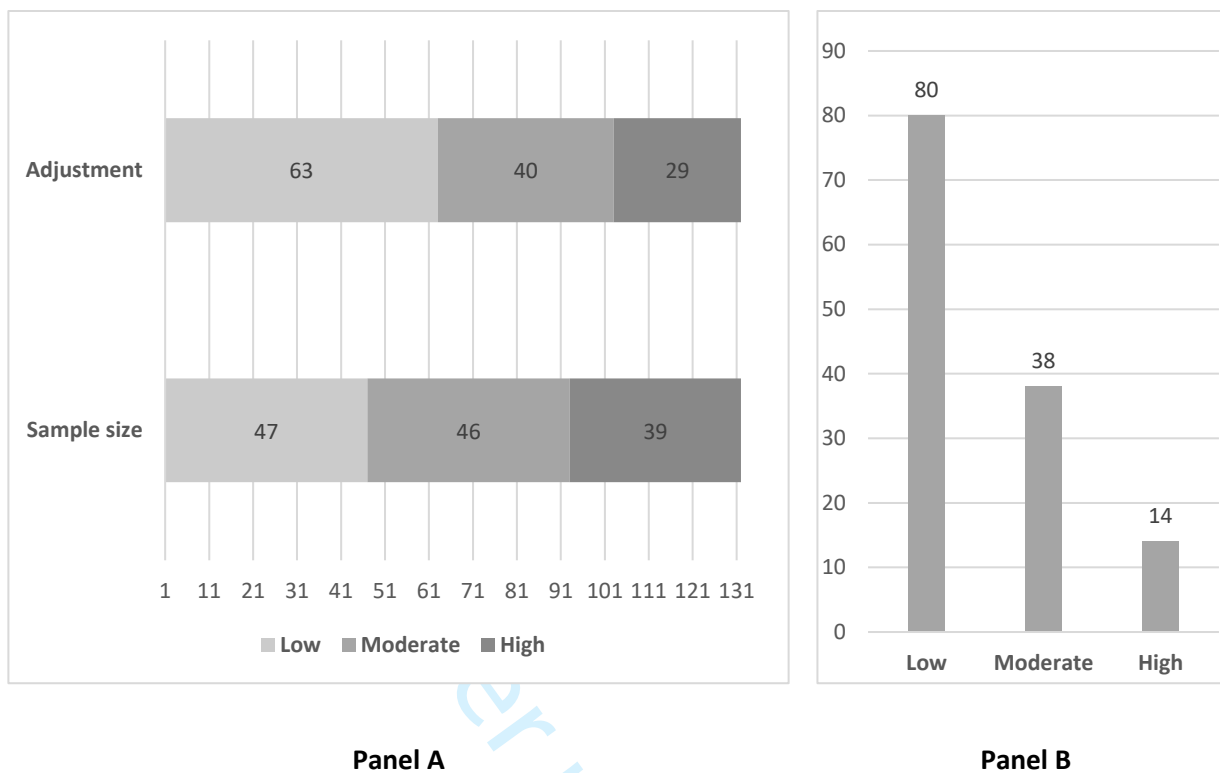

Panel A displays quality assessments separately on two key domains; Panel B displays overall assessments according to the "worst score counts algorithm"

**Supplementary File 2.** Overview of tested associations (n = 132) in the included studies (n = 26)

| Association ID | Study (author, year, reference)  | Effect size <sup>a</sup> | Significance                   | Sample size | Adjustment                    | Classification in review <sup>b</sup> |
|----------------|----------------------------------|--------------------------|--------------------------------|-------------|-------------------------------|---------------------------------------|
| 1              | Adler <i>et al.</i> , 2011 [34]  | $r = .11$                | $p = .01$                      | 473         | Unadjusted                    | ↑ * L                                 |
| 2              | "                                | $r = .10$                | $p = .03$                      | 473         | Unadjusted                    | ↑ * L                                 |
| 3              | "                                | $r = .14$                | $p = .002$                     | 473         | Unadjusted                    | ↑ * L                                 |
| 4              | "                                | $r = .14$                | $p = .002$                     | 473         | Unadjusted                    | ↑ * L                                 |
| 5              | "                                | $r = .16$                | $p < .001$                     | 473         | Unadjusted                    | ↑ * L                                 |
| 6              | "                                | $r = .07$                | $p = .16$                      | 473         | Unadjusted                    | ↑ ns L                                |
| 7              | "                                | $r = .08$                | $p = .08$                      | 473         | Unadjusted                    | ↑ ns L                                |
| 8              | "                                | $r = .09$                | $p = .50$                      | 473         | Unadjusted                    | ↑ ns L                                |
| 9              | "                                | $r = .07$                | $p = .11$                      | 473         | Unadjusted                    | ↑ ns L                                |
| 10             | "                                | $r = .10$                | $p = .04$                      | 473         | Unadjusted                    | ↑ * L                                 |
| 11             | Airila <i>et al.</i> , 2012 [53] | $r = -.05$               | ns                             | 403         | Unadjusted                    | ↑ ns L                                |
| 12             | "                                | $r = -.10$               | $p < .05$                      | 403         | Unadjusted                    | ↑ * L                                 |
| 13             | "                                | $r = -.05$               | ns                             | 403         | Unadjusted                    | ↑ ns L                                |
| 14             | "                                | $b = -.07$               | 95% CI: $-.18, .05$            | 403         | Age; work ability at baseline | ↑ ns L                                |
| 15             | "                                | $b = .01$                | 95% CI: $-.07, .09$            | 403         | Age; work ability at baseline | ↓ ns L                                |
| 16             | "                                | $b = -.06$               | 95% CI: $-.16, .05$            | 403         | Age; work ability at baseline | ↑ ns L                                |
| 17             | Fisher <i>et al.</i> , 2000 [42] | RR = 1.52                | $p < .05$ ; 95% CI: 1.36, 1.70 | Unclear     | Age                           | ↑ * L                                 |

|    |    |                               |           |                     |         |                                                          |        |
|----|----|-------------------------------|-----------|---------------------|---------|----------------------------------------------------------|--------|
| 1  |    |                               |           |                     |         |                                                          |        |
| 2  |    |                               |           |                     |         |                                                          |        |
| 3  | 18 | "                             | RR = 1.18 | 95% CI: 0.88, 1.60  | Unclear | Age                                                      | ↑ ns L |
| 4  |    |                               |           |                     |         |                                                          |        |
| 5  | 19 | "                             | RR = 1.76 | $p < .05$ ; 95% CI: | Unclear | Age                                                      | ↑ * L  |
| 6  |    |                               |           | 1.34, 2.33          |         |                                                          |        |
| 7  |    |                               |           |                     |         |                                                          |        |
| 8  | 20 | "                             | RR = 1.38 | 95% CI: 0.72, 2.61  | Unclear | Age                                                      | ↑ ns L |
| 9  |    |                               |           |                     |         |                                                          |        |
| 10 | 21 | "                             | RR = 1.25 | 95% CI: 0.96, 1.62  | Unclear | Age                                                      | ↑ ns L |
| 11 |    |                               |           |                     |         |                                                          |        |
| 12 | 22 | "                             | RR = 0.58 | 95% CI: 0.26, 1.30  | Unclear | Age                                                      | ↓ ns L |
| 13 |    |                               |           |                     |         |                                                          |        |
| 14 | 23 | "                             | RR = 1.39 | 95% CI: 0.62, 3.12  | Unclear | Age                                                      | ↑ ns L |
| 15 | 24 | Karlsson <i>et al.</i> , 2010 | OR = 0.91 | 95% CI: 0.33, 2.55  | 300     | Gender; age                                              | ↓ ns L |
| 16 |    | [45]                          |           |                     |         |                                                          |        |
| 17 |    |                               |           |                     |         |                                                          |        |
| 18 | 25 | "                             | OR = 2.33 | 95% CI: 0.84, 6.51  | 289     | Gender; age                                              | ↑ ns L |
| 19 |    |                               |           |                     |         |                                                          |        |
| 20 | 26 | Kessler & Frank, 1997         | b = .88   | $p < .05$           | 4091    | Unadjusted                                               | ↑ * L  |
| 21 |    | [54]                          |           |                     |         |                                                          |        |
| 22 |    |                               |           |                     |         |                                                          |        |
| 23 | 27 | "                             | b = .17   | ns                  | 4091    | Unadjusted                                               | ↑ ns L |
| 24 |    |                               |           |                     |         |                                                          |        |
| 25 | 28 | Kim <i>et al.</i> , 2013 [30] | unclear   | $p < .001$          | 946     | Unadjusted                                               | * L    |
| 26 |    |                               |           |                     |         |                                                          |        |
| 27 | 29 | "                             | unclear   | $p = .03$           | 946     | Age; employment; education;<br>body mass index; drug use | * M    |
| 28 |    |                               |           |                     |         |                                                          |        |
| 29 | 30 | "                             | unclear   | $p = .10$           | 884     | Age; employment; education;<br>body mass index; drug use | ↓ ns M |
| 30 |    |                               |           |                     |         |                                                          |        |
| 31 | 31 | "                             | unclear   | $p = .11$           | 577     | Age; employment; education;<br>body mass index; drug use | ↓ ns M |
| 32 |    |                               |           |                     |         |                                                          |        |
| 33 | 32 | "                             | unclear   | $p = .98$           | 577     | Age; employment; education;<br>body mass index; drug use | ↓ ns M |
| 34 |    |                               |           |                     |         |                                                          |        |
| 35 |    |                               |           |                     |         |                                                          |        |
| 36 |    |                               |           |                     |         |                                                          |        |
| 37 |    |                               |           |                     |         |                                                          |        |
| 38 |    |                               |           |                     |         |                                                          |        |
| 39 |    |                               |           |                     |         |                                                          |        |
| 40 |    |                               |           |                     |         |                                                          |        |
| 41 |    |                               |           |                     |         |                                                          |        |
| 42 |    |                               |           |                     |         |                                                          |        |
| 43 |    |                               |           |                     |         |                                                          |        |
| 44 |    |                               |           |                     |         |                                                          |        |
| 45 |    |                               |           |                     |         |                                                          |        |
| 46 |    |                               |           |                     |         |                                                          |        |

|    |    |                                      |               |                                  |       |                                                                           |        |
|----|----|--------------------------------------|---------------|----------------------------------|-------|---------------------------------------------------------------------------|--------|
| 1  |    |                                      |               |                                  |       |                                                                           |        |
| 2  |    |                                      |               |                                  |       |                                                                           |        |
| 3  | 33 | "                                    | unclear       | $p = .51$                        | 577   | Age; employment; education;<br>body mass index; drug use                  | ↓ ns M |
| 4  |    |                                      |               |                                  |       |                                                                           |        |
| 5  |    |                                      |               |                                  |       |                                                                           |        |
| 6  | 34 | "                                    | unclear       | $p = .97$                        | 369   | Age; employment; education;<br>body mass index; drug use                  | ↑ ns M |
| 7  |    |                                      |               |                                  |       |                                                                           |        |
| 8  |    |                                      |               |                                  |       |                                                                           |        |
| 9  | 35 | "                                    | unclear       | $p = .53$                        | 62    | Age; employment; education;<br>body mass index; drug use                  | ↑ ns M |
| 10 |    |                                      |               |                                  |       |                                                                           |        |
| 11 |    |                                      |               |                                  |       |                                                                           |        |
| 12 | 36 | Kirkham <i>et al.</i> , 2015<br>[41] | $\beta = .20$ | $p < .001$ ; 95% CI:<br>.14, .27 | 27459 | Age; gender; region of<br>residence; misc. work-related<br>factors        | ↑ * H  |
| 13 |    |                                      |               |                                  |       |                                                                           |        |
| 14 |    |                                      |               |                                  |       |                                                                           |        |
| 15 |    |                                      |               |                                  |       |                                                                           |        |
| 16 | 37 | "                                    | $\beta = .22$ | $p < .001$ ; 95% CI:<br>.13, .32 | 10639 | Age; gender; region of<br>residence; misc. work-related<br>factors        | ↑ * H  |
| 17 |    |                                      |               |                                  |       |                                                                           |        |
| 18 |    |                                      |               |                                  |       |                                                                           |        |
| 19 |    |                                      |               |                                  |       |                                                                           |        |
| 20 | 38 | "                                    | $\beta = .20$ | $p < .001$ ; 95% CI:<br>.10, .29 | 16820 | Age; gender; region of<br>residence; misc. work-related<br>factors        | ↑ * H  |
| 21 |    |                                      |               |                                  |       |                                                                           |        |
| 22 |    |                                      |               |                                  |       |                                                                           |        |
| 23 |    |                                      |               |                                  |       |                                                                           |        |
| 24 | 39 | Odlaug <i>et al.</i> , 2016<br>[55]  | unclear       | $p < .05$                        | 1373  | Unadjusted                                                                | ↑ * L  |
| 25 |    |                                      |               |                                  |       |                                                                           |        |
| 26 |    |                                      |               |                                  |       |                                                                           |        |
| 27 | 40 | Pensola <i>et al.</i> , 2016<br>[46] | PRR = 1.22    | 95% CI: 1.1, 1.4                 | 1351  | Age; gender                                                               | ↑ * M  |
| 28 |    |                                      |               |                                  |       |                                                                           |        |
| 29 |    |                                      |               |                                  |       |                                                                           |        |
| 30 | 41 | "                                    | PRR = 1.15    | 95% CI: 1.0, 1.3                 | 1351  | Age; gender; misc. work-<br>related, physical and<br>psychosocial factors | ↑ * H  |
| 31 |    |                                      |               |                                  |       |                                                                           |        |
| 32 |    |                                      |               |                                  |       |                                                                           |        |
| 33 |    |                                      |               |                                  |       |                                                                           |        |
| 34 | 42 | "                                    | PRR = 1.30    | 95% CI: 1.1, 1.6                 | 546   | Age                                                                       | ↑ * M  |
| 35 |    |                                      |               |                                  |       |                                                                           |        |
| 36 | 43 | "                                    | PRR = 1.21    | 95% CI: 1.0, 1.5                 | 546   | Age; gender; misc. work-<br>related, physical and<br>psychosocial factors | ↑ * M  |
| 37 |    |                                      |               |                                  |       |                                                                           |        |
| 38 |    |                                      |               |                                  |       |                                                                           |        |
| 39 |    |                                      |               |                                  |       |                                                                           |        |
| 40 |    |                                      |               |                                  |       |                                                                           |        |
| 41 |    |                                      |               |                                  |       |                                                                           |        |
| 42 |    |                                      |               |                                  |       |                                                                           |        |
| 43 |    |                                      |               |                                  |       |                                                                           |        |
| 44 |    |                                      |               |                                  |       |                                                                           |        |
| 45 |    |                                      |               |                                  |       |                                                                           |        |
| 46 |    |                                      |               |                                  |       |                                                                           |        |



1  
2  
3  
4  
5  
6  
7  
8  
9  
10  
11  
12  
13  
14  
15  
16  
17  
18  
19  
20  
21  
22  
23  
24  
25  
26  
27  
28  
29  
30  
31  
32  
33  
34  
35  
36  
37  
38  
39  
40  
41  
42  
43  
44  
45  
46

|    |                                           |                      |                    |      |                                                                    |        |
|----|-------------------------------------------|----------------------|--------------------|------|--------------------------------------------------------------------|--------|
| 44 | "                                         | PRR = 1.15           | 95% CI: 1.0, 1.4   | 805  | Age                                                                | ↑ * M  |
| 45 | "                                         | PRR = 1.01           | 95% CI: 0.9, 1.2   | 573  | Age; gender                                                        | ↑ ns M |
| 46 | "                                         | PRR = 1.92           | 95% CI: 1.4, 2.7   | 778  | Age; gender                                                        | ↑ * M  |
| 47 | "                                         | PRR = 1.80           | 95% CI: 1.3, 2.6   | 778  | Age; gender; misc. work-related, physical and psychosocial factors | ↑ * M  |
| 48 | Richmond <i>et al.</i> , 2016 [36]        | b = 0.017; β = .057  | ns                 | 338  | Baseline presenteeism                                              | ↑ ns L |
| 49 | Schou <i>et al.</i> , 2017 [44]           | r = .458             | p <.01             | 1406 | Unadjusted                                                         | ↑ * L  |
| 50 | Steedmann <i>et al.</i> , 1997 [56]       | r = .073             | ns                 | 45   | Unadjusted                                                         | ↑ ns L |
| 51 | Tsuchiya <i>et al.</i> , 2012 [47]        | b = -1.1             | 95% CI: -2.1, -0.0 | 530  | Unadjusted                                                         | ↑ * L  |
| 52 | "                                         | b = -1.1             | 95% CI: -2.1, -0.1 | 530  | Gender; age; education; job category; work time                    | ↑ * M  |
| 53 | van Scheppingen <i>et al.</i> , 2014 [57] | r = .01              | ns                 | 629  | Unadjusted                                                         | ↑ ns L |
| 54 | Yu <i>et al.</i> , 2015 [31]              | χ <sup>2</sup> = 4.6 | p <.05             | 1506 | Unadjusted                                                         | ↑ * L  |
| 55 | "                                         | OR = 1.76            | 95% CI: 1.02, 3.03 | 1506 | unclear                                                            | ↑ * L  |
| 56 | Friedman <i>et al.</i> , 1992 [27]        | r = -.09             | p <.01             | 860  | Unadjusted                                                         | ↑ * L  |
| 57 | "                                         | r = .02              | ns                 | 860  | Unadjusted                                                         | ↑ ns L |
| 58 | "                                         | r = -.14             | p <.01             | 973  | Unadjusted                                                         | ↑ * L  |

|    |    |                                 |                   |            |      |                                 |        |
|----|----|---------------------------------|-------------------|------------|------|---------------------------------|--------|
| 1  |    |                                 |                   |            |      |                                 |        |
| 2  |    |                                 |                   |            |      |                                 |        |
| 3  | 59 | "                               | $r = .09$         | $p < .01$  | 973  | Unadjusted                      | ↑ * L  |
| 4  |    |                                 |                   |            |      |                                 |        |
| 5  | 60 | "                               | $r = -.12$        | $p < .01$  | 886  | Unadjusted                      | ↑ * L  |
| 6  |    |                                 |                   |            |      |                                 |        |
| 7  | 61 | "                               | $r = .05$         | ns         | 886  | Unadjusted                      | ↑ ns L |
| 8  |    |                                 |                   |            |      |                                 |        |
| 9  | 62 | "                               | $r = -.13$        | $p < .01$  | 852  | Unadjusted                      | ↑ * L  |
| 10 |    |                                 |                   |            |      |                                 |        |
| 11 | 63 | "                               | $r = .06$         | ns         | 852  | Unadjusted                      | ↑ ns L |
| 12 |    |                                 |                   |            |      |                                 |        |
| 13 | 64 | "                               | $r = .09$         | $p < .01$  | 863  | Unadjusted                      | ↑ * L  |
| 14 |    |                                 |                   |            |      |                                 |        |
| 15 | 65 | "                               | $r = .03$         | ns         | 863  | Unadjusted                      | ↑ ns L |
| 16 |    |                                 |                   |            |      |                                 |        |
| 17 | 66 | "                               | $r = .10$         | $p < .01$  | 1229 | Unadjusted                      | ↓ ns L |
| 18 |    |                                 |                   |            |      |                                 |        |
| 19 | 67 | "                               | $r = .06$         | $p < .05$  | 1229 | Unadjusted                      | ↑ * L  |
| 20 |    |                                 |                   |            |      |                                 |        |
| 21 | 68 | "                               | $r = .09$         | $p < .01$  | 1229 | Unadjusted                      | ↓ * L  |
| 22 |    |                                 |                   |            |      |                                 |        |
| 23 | 69 | "                               | $r = .07$         | $p < .05$  | 1229 | Unadjusted                      | ↑ * L  |
| 24 |    |                                 |                   |            |      |                                 |        |
| 25 | 70 | Boles <i>et al.</i> , 2004 [43] | unclear           | ns         | 2264 | Age; gender; misc. risk factors | ↑ ns H |
| 26 |    |                                 |                   |            |      |                                 |        |
| 27 | 71 | "                               | OR = 3.74         | $p = .115$ | 2264 | Age; gender; misc. risk factors | ↑ ns H |
| 28 |    |                                 |                   |            |      |                                 |        |
| 29 | 72 | "                               | b = 0.901         | $p = .930$ | 2264 | Age; gender; misc. risk factors | ↑ ns H |
| 30 |    |                                 |                   |            |      |                                 |        |
| 31 |    |                                 |                   |            |      |                                 |        |
| 32 | 73 | Blum <i>et al.</i> , 1993 [35]  | $r = -.016$       | ns         | 136  | Unadjusted                      | ↑ ns L |
| 33 |    |                                 |                   |            |      |                                 |        |
| 34 | 74 | "                               | $M_{diff} = 0.01$ | ns         | 136  | Unadjusted                      | ↑ ns L |
| 35 |    |                                 |                   |            |      |                                 |        |
| 36 | 75 | "                               | $M_{diff} = 0.21$ | ns         | 136  | Unadjusted                      | ↑ ns L |
| 37 |    |                                 |                   |            |      |                                 |        |
| 38 | 76 | "                               | $M_{diff} = 0.05$ | ns         | 136  | Unadjusted                      | ↑ ns L |
| 39 |    |                                 |                   |            |      |                                 |        |
| 40 |    |                                 |                   |            |      |                                 |        |
| 41 |    |                                 |                   |            |      |                                 |        |
| 42 |    |                                 |                   |            |      |                                 |        |
| 43 |    |                                 |                   |            |      |                                 |        |
| 44 |    |                                 |                   |            |      |                                 |        |
| 45 |    |                                 |                   |            |      |                                 |        |
| 46 |    |                                 |                   |            |      |                                 |        |

|    |    |                                     |                      |           |       |                                           |        |
|----|----|-------------------------------------|----------------------|-----------|-------|-------------------------------------------|--------|
| 1  |    |                                     |                      |           |       |                                           |        |
| 2  |    |                                     |                      |           |       |                                           |        |
| 3  | 77 | "                                   | $r = -.185$          | $p < .05$ | 136   | Unadjusted                                | ↑ * L  |
| 4  |    |                                     |                      |           |       |                                           |        |
| 5  | 78 | "                                   | $M_{diff} = 0.19$    | $p < .05$ | 136   | Unadjusted                                | ↑ * L  |
| 6  |    |                                     |                      |           |       |                                           |        |
| 7  | 79 | "                                   | $M_{diff} = 0.16$    | ns        | 136   | Unadjusted                                | ↑ ns L |
| 8  |    |                                     |                      |           |       |                                           |        |
| 9  | 80 | "                                   | $M_{diff} = 0.03$    | ns        | 136   | Unadjusted                                | ↑ ns L |
| 10 |    |                                     |                      |           |       |                                           |        |
| 11 | 81 | "                                   | $r = -.233$          | $p < .01$ | 136   | Unadjusted                                | ↑ * L  |
| 12 |    |                                     |                      |           |       |                                           |        |
| 13 | 82 | "                                   | $M_{diff} = 0.28$    | $p < .01$ | 136   | Unadjusted                                | ↑ * L  |
| 14 |    |                                     |                      |           |       |                                           |        |
| 15 | 83 | "                                   | $M_{diff} = 0.35$    | $p < .01$ | 136   | Unadjusted                                | ↑ * L  |
| 16 |    |                                     |                      |           |       |                                           |        |
| 17 | 84 | "                                   | $M_{diff} = 0.03$    | $p < .05$ | 136   | Unadjusted                                | ↑ * L  |
| 18 | 85 | Burton <i>et al.</i> , 2005 [58]    | $M_{diff} = -0.0748$ | ns        | 28375 | Age; gender; diseases; misc. risk factors | ↓ ns H |
| 19 |    |                                     |                      |           |       |                                           |        |
| 20 | 86 | "                                   | $M_{diff} = -0.0447$ | ns        | 28375 | Age; gender; diseases; misc. risk factors | ↓ ns H |
| 21 |    |                                     |                      |           |       |                                           |        |
| 22 | 87 | "                                   | $M_{diff} = -0.0833$ | ns        | 28375 | Age; gender; diseases; misc. risk factors | ↓ ns H |
| 23 |    |                                     |                      |           |       |                                           |        |
| 24 | 88 | "                                   | $M_{diff} = -0.0853$ | ns        | 28375 | Age; gender; diseases; misc. risk factors | ↓ ns H |
| 25 |    |                                     |                      |           |       |                                           |        |
| 26 | 89 | "                                   | $M_{diff} = -0.0865$ | ns        | 28375 | Age; gender; diseases; misc. risk factors | ↓ ns H |
| 27 |    |                                     |                      |           |       |                                           |        |
| 28 | 90 | Lim <i>et al.</i> , 2000 [37]       | $b = -0.92$          | ns        | 4579  | Physical and mental disorders             | ↓ ns M |
| 29 |    |                                     |                      |           |       |                                           |        |
| 30 | 91 | "                                   | $b = 0.18$           | ns        | 4579  | Physical and mental disorders             | ↑ ns M |
| 31 |    |                                     |                      |           |       |                                           |        |
| 32 | 92 | Lowmaster <i>et al.</i> , 2012 [38] | $r = .21$            | ns        | 85    | Unadjusted                                | ↓ ns L |
| 33 |    |                                     |                      |           |       |                                           |        |
| 34 | 93 | "                                   | $r = .12$            | ns        | 29    | Unadjusted                                | ↓ ns L |
| 35 |    |                                     |                      |           |       |                                           |        |
| 36 |    |                                     |                      |           |       |                                           |        |
| 37 |    |                                     |                      |           |       |                                           |        |
| 38 |    |                                     |                      |           |       |                                           |        |
| 39 |    |                                     |                      |           |       |                                           |        |
| 40 |    |                                     |                      |           |       |                                           |        |
| 41 |    |                                     |                      |           |       |                                           |        |
| 42 |    |                                     |                      |           |       |                                           |        |
| 43 |    |                                     |                      |           |       |                                           |        |
| 44 |    |                                     |                      |           |       |                                           |        |
| 45 |    |                                     |                      |           |       |                                           |        |
| 46 |    |                                     |                      |           |       |                                           |        |

|    |     |                                 |                                |           |      |                                            |        |
|----|-----|---------------------------------|--------------------------------|-----------|------|--------------------------------------------|--------|
| 1  |     |                                 |                                |           |      |                                            |        |
| 2  |     |                                 |                                |           |      |                                            |        |
| 3  | 94  | "                               | $r = .23$                      | ns        | 56   | Unadjusted                                 | ↓ ns L |
| 4  |     |                                 |                                |           |      |                                            |        |
| 5  | 95  | Moore <i>et al.</i> , 2000 [28] | unclear                        | $p < .05$ | 1521 | Unadjusted                                 | ↑ * L  |
| 6  |     |                                 |                                |           |      |                                            |        |
| 7  | 96  | "                               | unclear                        | $p < .05$ | 1378 | Unadjusted                                 | ↑ * L  |
| 8  |     |                                 |                                |           |      |                                            |        |
| 9  | 97  | "                               | unclear                        | $p < .05$ | 520  | Unadjusted                                 | ↑ * L  |
| 10 |     |                                 |                                |           |      |                                            |        |
| 11 | 98  | "                               | unclear                        | $p < .05$ | 2256 | Demographic variables                      | * M    |
| 12 |     |                                 |                                |           |      |                                            |        |
| 13 | 99  | "                               | $M_{diff} = 0.1$               | $p = .65$ | 1780 | Demographic variables                      | ↓ ns M |
| 14 | 100 | "                               | $M_{diff} = 0.2$               | $p = .10$ | 520  | Demographic variables                      | ↑ ns M |
| 15 |     |                                 |                                |           |      |                                            |        |
| 16 | 101 | "                               | $M_{diff} = 0.3$               | $p < .01$ | 1378 | Demographic variables                      | ↑ * M  |
| 17 |     |                                 |                                |           |      |                                            |        |
| 18 | 102 | "                               | $M_{diff} = 0.0$               | $p = .68$ | 676  | Demographic variables                      | ns M   |
| 19 |     |                                 |                                |           |      |                                            |        |
| 20 | 103 | "                               | $M_{diff} = 0.1$               | $p = .09$ | 1534 | Demographic variables                      | ↑ ns M |
| 21 |     |                                 |                                |           |      |                                            |        |
| 22 | 104 | "                               | $M_{diff} = 0.2$               | $p = .10$ | 274  | Demographic variables                      | ↑ ns L |
| 23 |     |                                 |                                |           |      |                                            |        |
| 24 | 105 | "                               | $M_{diff} = 0.1$               | $p = .42$ | 663  | Demographic variables                      | ↑ ns M |
| 25 |     |                                 |                                |           |      |                                            |        |
| 26 | 106 | "                               | $M_{diff} = 0.2$               | $p < .05$ | 1521 | Demographic variables                      | ↑ * M  |
| 27 |     |                                 |                                |           |      |                                            |        |
| 28 | 107 | "                               | $M_{diff} = 0.1$               | $p = .22$ | 261  | Demographic variables                      | ↑ ns L |
| 29 |     |                                 |                                |           |      |                                            |        |
| 30 | 108 | Ames <i>et al.</i> , 1997 [32]  | $b = -0.02; \beta =$<br>$-.02$ | ns        | 832  | Drinking variables; job<br>characteristics | ↓ ns M |
| 31 |     |                                 |                                |           |      |                                            |        |
| 32 | 109 | "                               | $b = 0.08; \beta =$<br>$.08$   | $p < .05$ | 832  | Drinking variables; job<br>characteristics | ↑ * M  |
| 33 |     |                                 |                                |           |      |                                            |        |
| 34 | 110 | "                               | $b = 0.08; \beta =$<br>$.08$   | $p < .05$ | 832  | Drinking variables; job<br>characteristics | ↑ * M  |
| 35 |     |                                 |                                |           |      |                                            |        |
| 36 | 111 | "                               | $b = -0.01; \beta =$<br>$-.01$ | ns        | 832  | Drinking variables; job<br>characteristics | ↓ ns M |
| 37 |     |                                 |                                |           |      |                                            |        |
| 38 |     |                                 |                                |           |      |                                            |        |
| 39 |     |                                 |                                |           |      |                                            |        |
| 40 |     |                                 |                                |           |      |                                            |        |
| 41 |     |                                 |                                |           |      |                                            |        |
| 42 |     |                                 |                                |           |      |                                            |        |
| 43 |     |                                 |                                |           |      |                                            |        |
| 44 |     |                                 |                                |           |      |                                            |        |
| 45 |     |                                 |                                |           |      |                                            |        |
| 46 |     |                                 |                                |           |      |                                            |        |

1  
2  
3  
4  
5  
6  
7  
8  
9  
10  
11  
12  
13  
14  
15  
16  
17  
18  
19  
20  
21  
22  
23  
24  
25  
26  
27  
28  
29  
30  
31  
32  
33  
34  
35  
36  
37  
38  
39  
40  
41  
42  
43  
44  
45  
46

|     |                                |                            |                    |      |                                                                          |        |
|-----|--------------------------------|----------------------------|--------------------|------|--------------------------------------------------------------------------|--------|
| 112 | "                              | $b = -0.03; \beta = -0.03$ | ns                 | 832  | Drinking variables; job characteristics                                  | ↓ ns M |
| 113 | "                              | $b = -0.02; \beta = -0.02$ | ns                 | 832  | Drinking variables; sociodemographics                                    | ↓ ns M |
| 114 | "                              | $b = -0.01; \beta = -0.01$ | ns                 | 832  | Drinking variables; sociodemographics                                    | ↓ ns M |
| 115 | "                              | $b = 0.21; \beta = .21$    | $p < .001$         | 832  | Drinking variables; sociodemographics                                    | ↑ * M  |
| 116 | "                              | $b = -0.01; \beta = -0.01$ | ns                 | 832  | Drinking variables; sociodemographics                                    | ↓ ns M |
| 117 | "                              | $b = 0.00; \beta = .00$    | ns                 | 832  | Drinking variables; sociodemographics                                    | ↑ ns M |
| 118 | "                              | $\eta^2 = .01$             | $p < .02$          | 832  | Unadjusted                                                               | ↑ * L  |
| 119 | "                              | $\eta^2 = .01$             | $p < .05$          | 832  | Unadjusted                                                               | ↑ * L  |
| 120 | "                              | $\eta^2 = .02$             | $p < .01$          | 832  | Unadjusted                                                               | ↑ * L  |
| 121 | "                              | $\eta^2 = .01$             | $p < .05$          | 832  | Unadjusted                                                               | ↑ * L  |
| 122 | Furu <i>et al.</i> , 2018 [39] | OR = 1.25                  | 95% CI: 0.98, 1.61 | 1622 | Unadjusted                                                               | ↑ ns L |
| 123 | "                              | OR = 1.36                  | 95% CI: 1.05, 1.77 | 1622 | Age                                                                      | ↑ * M  |
| 124 | Aas <i>et al.</i> , 2017 [33]  | $r = .049$                 | $p < .01$          | 3278 | Unadjusted                                                               | ↑ * L  |
| 125 | "                              | $r = .076$                 | $p < .001$         | 3278 | Unadjusted                                                               | ↑ * L  |
| 126 | "                              | $b = 0.016; \beta = .028$  | ns                 | 3278 | Gender; age; education; living status; employment sector; binge drinking | ↑ ns H |

|     |                                        |                           |                    |      |                                                                              |        |
|-----|----------------------------------------|---------------------------|--------------------|------|------------------------------------------------------------------------------|--------|
| 127 | "                                      | $b = 0.040; \beta = .057$ | $p < .01$          | 3278 | Gender; age; education; living status; employment sector; drinking frequency | ↑ * H  |
| 128 | van den Berg <i>et al.</i> , 2017 [29] | OR = 1.23                 | 95% CI: 0.87, 1.74 | 509  | Gender; age; education                                                       | ↑ ns M |
| 129 | "                                      | OR = 1.28                 | 95% CI: 0.99, 1.65 | 1267 | Gender; age; education                                                       | ↑ ns M |
| 130 | "                                      | OR = 1.00                 | ns                 | 410  | Gender; age; education                                                       | ns L   |
| 131 | "                                      | OR = 1.18                 | 95% CI: 0.66, 3.11 | 413  | Gender; age; education                                                       | ↑ ns L |
| 132 | "                                      | OR = 1.52                 | 95% CI: 0.96, 2.41 | 335  | Gender; age; education                                                       | ↑ ns L |

<sup>a</sup>  $r$  = correlation coefficient;  $b$  = unstandardised regression coefficient; RR = relative risk; OR = odds ratio;  $\beta$  = standardised regression coefficient; PRR = prevalence risk ratio;  $\chi^2$  = chi square;  $M_{diff}$  = mean difference;  $\eta^2$  = eta squared

<sup>b</sup> ↑ = positive association; ↓ = negative association; | = inconsistent direction; \* = significant association; ns = non-significant association; L = low quality association; M = moderate quality association; H = high quality association

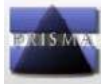

# PRISMA 2009 Checklist

| Section/topic                      | #  | Checklist item                                                                                                                                                                                                                                                                                              | Reported on page # |
|------------------------------------|----|-------------------------------------------------------------------------------------------------------------------------------------------------------------------------------------------------------------------------------------------------------------------------------------------------------------|--------------------|
| <b>TITLE</b>                       |    |                                                                                                                                                                                                                                                                                                             |                    |
| Title                              | 1  | Identify the report as a systematic review, meta-analysis, or both.                                                                                                                                                                                                                                         | 1                  |
| <b>ABSTRACT</b>                    |    |                                                                                                                                                                                                                                                                                                             |                    |
| Structured summary                 | 2  | Provide a structured summary including, as applicable: background; objectives; data sources; study eligibility criteria, participants, and interventions; study appraisal and synthesis methods; results; limitations; conclusions and implications of key findings; systematic review registration number. | 2                  |
| <b>INTRODUCTION</b>                |    |                                                                                                                                                                                                                                                                                                             |                    |
| Rationale                          | 3  | Describe the rationale for the review in the context of what is already known.                                                                                                                                                                                                                              | 7                  |
| Objectives                         | 4  | Provide an explicit statement of questions being addressed with reference to participants, interventions, comparisons, outcomes, and study design (PICOS).                                                                                                                                                  | 7                  |
| <b>METHODS</b>                     |    |                                                                                                                                                                                                                                                                                                             |                    |
| Protocol and registration          | 5  | Indicate if a review protocol exists, if and where it can be accessed (e.g., Web address), and, if available, provide registration information including registration number.                                                                                                                               | 8                  |
| Eligibility criteria               | 6  | Specify study characteristics (e.g., PICOS, length of follow-up) and report characteristics (e.g., years considered, language, publication status) used as criteria for eligibility, giving rationale.                                                                                                      | 8                  |
| Information sources                | 7  | Describe all information sources (e.g., databases with dates of coverage, contact with study authors to identify additional studies) in the search and date last searched.                                                                                                                                  | 9                  |
| Search                             | 8  | Present full electronic search strategy for at least one database, including any limits used, such that it could be repeated.                                                                                                                                                                               | 9                  |
| Study selection                    | 9  | State the process for selecting studies (i.e., screening, eligibility, included in systematic review, and, if applicable, included in the meta-analysis).                                                                                                                                                   | 9-10               |
| Data collection process            | 10 | Describe method of data extraction from reports (e.g., piloted forms, independently, in duplicate) and any processes for obtaining and confirming data from investigators.                                                                                                                                  | 10                 |
| Data items                         | 11 | List and define all variables for which data were sought (e.g., PICOS, funding sources) and any assumptions and simplifications made.                                                                                                                                                                       | 10                 |
| Risk of bias in individual studies | 12 | Describe methods used for assessing risk of bias of individual studies (including specification of whether this was done at the study or outcome level), and how this information is to be used in any data synthesis.                                                                                      | 10-11              |
| Summary measures                   | 13 | State the principal summary measures (e.g., risk ratio, difference in means).                                                                                                                                                                                                                               | n/a <sup>1</sup>   |
| Synthesis of results               | 14 | Describe the methods of handling data and combining results of studies, if done, including measures of consistency (e.g., I <sup>2</sup> ) for each meta-analysis.                                                                                                                                          | 11                 |

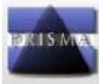

# PRISMA 2009 Checklist

| Section/topic                 | #  | Checklist item                                                                                                                                                                                           | Reported on page #                       |
|-------------------------------|----|----------------------------------------------------------------------------------------------------------------------------------------------------------------------------------------------------------|------------------------------------------|
| Risk of bias across studies   | 15 | Specify any assessment of risk of bias that may affect the cumulative evidence (e.g., publication bias, selective reporting within studies).                                                             | n/a <sup>1</sup>                         |
| Additional analyses           | 16 | Describe methods of additional analyses (e.g., sensitivity or subgroup analyses, meta-regression), if done, indicating which were pre-specified.                                                         | n/a <sup>1</sup>                         |
| <b>RESULTS</b>                |    |                                                                                                                                                                                                          |                                          |
| Study selection               | 17 | Give numbers of studies screened, assessed for eligibility, and included in the review, with reasons for exclusions at each stage, ideally with a flow diagram.                                          | 12-13, Fig.1                             |
| Study characteristics         | 18 | For each study, present characteristics for which data were extracted (e.g., study size, PICOS, follow-up period) and provide the citations.                                                             | Table1                                   |
| Risk of bias within studies   | 19 | Present data on risk of bias of each study and, if available, any outcome level assessment (see item 12).                                                                                                | 20, SF1 <sup>2</sup>                     |
| Results of individual studies | 20 | For all outcomes considered (benefits or harms), present, for each study: (a) simple summary data for each intervention group (b) effect estimates and confidence intervals, ideally with a forest plot. | 20-28, Table2, Table 4, SF2 <sup>3</sup> |
| Synthesis of results          | 21 | Present results of each meta-analysis done, including confidence intervals and measures of consistency.                                                                                                  | 23, Table3                               |
| Risk of bias across studies   | 22 | Present results of any assessment of risk of bias across studies (see Item 15).                                                                                                                          | n/a <sup>1</sup>                         |
| Additional analysis           | 23 | Give results of additional analyses, if done (e.g., sensitivity or subgroup analyses, meta-regression [see Item 16]).                                                                                    | n/a <sup>1</sup>                         |
| <b>DISCUSSION</b>             |    |                                                                                                                                                                                                          |                                          |
| Summary of evidence           | 24 | Summarize the main findings including the strength of evidence for each main outcome; consider their relevance to key groups (e.g., healthcare providers, users, and policy makers).                     | 28-31                                    |
| Limitations                   | 25 | Discuss limitations at study and outcome level (e.g., risk of bias), and at review-level (e.g., incomplete retrieval of identified research, reporting bias).                                            | 32-34                                    |
| Conclusions                   | 26 | Provide a general interpretation of the results in the context of other evidence, and implications for future research.                                                                                  | 31-32                                    |
| <b>FUNDING</b>                |    |                                                                                                                                                                                                          |                                          |
| Funding                       | 27 | Describe sources of funding for the systematic review and other support (e.g., supply of data); role of funders for the systematic review.                                                               | 34-35                                    |

From: Moher D, Liberati A, Tetzlaff J, Altman DG, The PRISMA Group (2009). Preferred Reporting Items for Systematic Reviews and Meta-Analyses: The PRISMA Statement. PLoS Med 6(7): e1000097. doi:10.1371/journal.pmed1000097

For peer review only - <http://bmjopen.bmj.com/site/about/guidelines.xhtml>  
For more information, visit: [www.prisma-statement.org](http://www.prisma-statement.org)



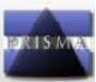

# PRISMA 2009 Checklist

1  
2  
3  
4  
5  
6  
7  
8  
9  
10  
11  
12  
13  
14  
15  
16  
17  
18  
19  
20  
21  
22  
23  
24  
25  
26  
27  
28  
29  
30  
31  
32  
33  
34  
35  
36  
37  
38  
39  
40  
41  
42  
43  
44  
45  
46  
47

- <sup>1</sup> n/a = not applicable
- <sup>2</sup> SF1 = Supplementary File 1
- <sup>3</sup> SF2 = Supplementary File 2

For peer review only

# BMJ Open

## Association between alcohol consumption and impaired work performance (presenteeism): A systematic review

|                                 |                                                                                                                                                                                                                                                                                                                                                                                                                                                  |
|---------------------------------|--------------------------------------------------------------------------------------------------------------------------------------------------------------------------------------------------------------------------------------------------------------------------------------------------------------------------------------------------------------------------------------------------------------------------------------------------|
| Journal:                        | <i>BMJ Open</i>                                                                                                                                                                                                                                                                                                                                                                                                                                  |
| Manuscript ID                   | bmjopen-2019-029184.R1                                                                                                                                                                                                                                                                                                                                                                                                                           |
| Article Type:                   | Research                                                                                                                                                                                                                                                                                                                                                                                                                                         |
| Date Submitted by the Author:   | 20-Mar-2019                                                                                                                                                                                                                                                                                                                                                                                                                                      |
| Complete List of Authors:       | Thørrisen, Mikkel; OsloMet - Oslo Metropolitan University, Bonsaksen, Tore; OsloMet - Oslo Metropolitan University; VID Specialized University<br>Hashemi, Neda; University of Stavanger<br>Kjeken, Ingvild; OsloMet - Oslo Metropolitan University; Diakonhjemmet Hospital<br>Van Mechelen, Willem; VU University Medical Center, Public and Occupational Health<br>Aas, Randi; University of Stavanger; OsloMet - Oslo Metropolitan University |
| <b>Primary Subject Heading</b>: | Public health                                                                                                                                                                                                                                                                                                                                                                                                                                    |
| Secondary Subject Heading:      | Addiction, Occupational and environmental medicine, Public health, Epidemiology                                                                                                                                                                                                                                                                                                                                                                  |
| Keywords:                       | EPIDEMIOLOGY, OCCUPATIONAL & INDUSTRIAL MEDICINE, PREVENTIVE MEDICINE, Substance misuse < PSYCHIATRY, PUBLIC HEALTH, SOCIAL MEDICINE                                                                                                                                                                                                                                                                                                             |
|                                 |                                                                                                                                                                                                                                                                                                                                                                                                                                                  |

SCHOLARONE™  
Manuscripts

# Association between alcohol consumption and impaired work performance (presenteeism): A systematic review

Mikkel Magnus Thørrisen<sup>1\*</sup>  
[mikkel-magnus.thorrisen@oslomet.no](mailto:mikkel-magnus.thorrisen@oslomet.no)

Tore Bonsaksen<sup>1,2</sup>

Neda Hashemi<sup>3</sup>

Ingvild Kjekken<sup>1,4</sup>

Willem van Mechelen<sup>5,6,7,8,9</sup>

Randi Wågø Aas<sup>1,3,10</sup>

<sup>1</sup> Department of Occupational Therapy, Prosthetics and Orthotics, Faculty of Health Sciences, OsloMet – Oslo Metropolitan University, Oslo, Norway

<sup>2</sup> Faculty of Health Studies, VID Specialized University, Sandnes, Norway

<sup>3</sup> Department of Public Health, Faculty of Health Sciences, University of Stavanger, Stavanger, Norway

<sup>4</sup> National Advisory Unit on Rehabilitation in Rheumatology, Diakonhjemmet Hospital, Oslo, Norway

<sup>5</sup> Amsterdam University Medical Centers, Location VUmc, Department of Public and Occupational Health and Amsterdam Public Health Research Institute, Amsterdam, the Netherlands

<sup>6</sup> Center of Human Movement Sciences, University Medical Center Groningen and University of Groningen, Groningen, the Netherlands

<sup>7</sup> School of Human Movement and Nutrition Sciences, Faculty of Health and Behavioural Sciences, University of Queensland, Brisbane, Australia

<sup>8</sup> Department of Human Biology, Faculty of Health Sciences, University of Cape Town, South Africa

<sup>9</sup> School of Public Health, Physiotherapy and Population Sciences, University College Dublin, Dublin, Ireland

<sup>10</sup> Presenter – Making Sense of Science, Stavanger, Norway

\* Corresponding author: Mikkel Magnus Thørrisen. Postal address: OsloMet – Oslo Metropolitan University, Faculty of Health Sciences, Department of Occupational Therapy, Prosthetics and Orthotics, PO box 4 St. Olavs plass, NO-0130, Oslo, Norway.

Email: [mikkel-magnus.thorrisen@oslomet.no](mailto:mikkel-magnus.thorrisen@oslomet.no)

Telephone: +47 466 34 758

Word count: 6661

## ABSTRACT

**Objectives** The aim of this review was to explore the notion of alcohol-related presenteeism, i.e., whether evidence in the research literature supports an association between employee alcohol consumption and impaired work performance.

**Design** Systematic review of observational studies.

**Data sources** Medline, Web of Science, PsycINFO, Cinahl, Amed, Embase and Swemed+ were searched through October 2018. Reference lists in included studies were hand searched for potential relevant studies.

**Eligibility criteria** We included observational studies, published 1990 or later as full text empirical articles in peer-reviewed journals in English or a Scandinavian language, containing one or more statistical tests regarding a relationship between a measure of alcohol consumption and a measure of work performance.

**Data extraction and synthesis** Two independent reviewers extracted data. Tested associations between alcohol consumption and work performance within the included studies were quality assessed, and analysed with frequency tables, cross tabulations and chi square tests of independence.

**Results** Twenty-six studies were included, containing 132 tested associations. The vast majority of associations (77 %) indicated that higher levels of alcohol consumption were associated with higher levels of impaired work performance, and these positive associations were considerably more likely than negative associations to be statistically significant (OR = 14.00,  $phi = .37$ ,  $p < .001$ ). Alcohol exposure measured by hangover episodes and composite instruments were overrepresented among significant positive associations of moderate and high quality (15 of 17 associations). Overall, 61 % of the associations were characterised by low quality.

1  
2  
3 1 **Conclusions** Evidence does provide some support for the notion of alcohol-related  
4  
5 2 presenteeism. However, due to low research quality and lack of longitudinal designs, evidence  
6  
7 3 should be characterised as somewhat inconclusive. More robust and less heterogeneous  
8  
9 4 research is warranted. This review, however, does provide support for targeting alcohol  
10  
11 5 consumption within the frame of workplace interventions aimed at improving employee  
12  
13 6 health and productivity.

14  
15  
16  
17 7 **PROSPERO registration number** CRD42017059620  
18

19 8  
20  
21 9 *Key words:* Alcohol consumption; Presenteeism; Work performance; Sick leave; Employees;  
22  
23 10 Workplace interventions; Workplace health promotion  
24  
25  
26  
27  
28

### 29 12 **Strengths and limitations of this study**

- 30  
31 13 • This systematic review is, to the best of our knowledge, the first to exclusively explore  
32  
33 14 evidence for the notion of alcohol-related presenteeism.  
34  
35 15 • The review was based on comprehensive searches in seven scientific databases as well  
36  
37 16 as in reference lists, and included studies containing data from more than 92 000  
38  
39 17 employees across 15 countries  
40  
41  
42 18 • As a result of included studies often being characterised by exploring broader aims  
43  
44 19 related to health and productivity, and by testing several relevant associations between  
45  
46 20 alcohol consumption and work performance, associations were chosen as the unit of  
47  
48 21 analysis.  
49  
50  
51 22 • Due to the heterogeneous nature of the included data, meta-analyses were deemed  
52  
53 23 inappropriate, in particular since measures of alcohol consumption were difficult to  
54  
55 24 compare across studies/associations (e.g., abstainer vs. drinker; frequency; volume;  
56  
57 25 hangovers; binge drinking; composite instruments and dependence/abuse diagnoses).  
58  
59  
60

- 1  
2  
3 • Included data were quality assessed on an association level by means of a  
4 parsimonious and conservative assessment system developed specifically for this  
5 review.  
6  
7  
8  
9  
10  
11

## 12 INTRODUCTION

### 14 Alcohol consumption

17 Excessive alcohol consumption is a major risk factor for disease, disability and mortality,  
18 and has been identified as a causal agent in more than 200 disease and injury conditions.<sup>1</sup>  
19 Higher alcohol consumption has been found to be associated with lowered life expectancy,<sup>2</sup>  
20 and, according to the World Health Organization,<sup>3</sup> harmful alcohol consumption is related to  
21 approximately three million annual deaths globally. Among the population aged 15 to 49  
22 years, alcohol has been identified as the leading risk factor for death and disability-adjusted  
23 life-years.<sup>4</sup> Alcohol is by far the most used and misused psychoactive substance in the  
24 workforce,<sup>5</sup> and one to three out of ten employees can be characterised as risky drinkers in  
25 need for interventions,<sup>6-9</sup> that is, having a consumption pattern that increases the risk for  
26 social-, legal-, medical-, occupational-, domestic- and economic problems.<sup>10</sup> Even though  
27 adverse consequences of alcohol tend to accumulate in concordance with increased  
28 consumption,<sup>2,4</sup> it is far from straightforward to establish an appropriate threshold  
29 distinguishing between no/low-risk and risky drinking. Whether a particular drinking pattern  
30 or consumption level can be conceived of as risky, depends on several factors, such as: (i)  
31 effects of alcohol consumption interact with other individual characteristics, such as general  
32 health, sociodemographic, physiological and other lifestyle factors,<sup>11</sup> and (ii) any level of  
33 drinking may be risky given certain circumstances, such as when being pregnant, operating  
34 heavy machinery and taking medications known to interact with alcohol.<sup>12</sup> International  
35 drinking guidelines, often expressed in terms of a number of alcohol units during a specific  
36  
37  
38  
39  
40  
41  
42  
43  
44  
45  
46  
47  
48  
49  
50  
51  
52  
53  
54  
55  
56  
57  
58  
59  
60

1  
2  
3 1 time frame, vary considerably across countries and, moreover, even standard drink sizes vary  
4  
5 2 internationally.<sup>12</sup> In both research and clinical practice, thresholds for risky drinking are often  
6  
7 3 applied based on scores on composite instruments, assuming a more complex relationship  
8  
9 4 between alcohol and health, such as a score of 8 or higher on the Alcohol Use Disorders  
10  
11  
12 5 Identification Test (AUDIT).<sup>10, 13</sup>

14 6 Alcohol can affect mood as well as cognitive and psychomotor performance.  
15  
16 7 Psychopharmacological and experimental workplace simulation studies have explored effects  
17  
18 8 of alcohol intoxication on performance, generally suggesting little consistent impairment at  
19  
20 9 low to moderate intoxication levels (blood alcohol content (BAC) 0.01 % - 0.08 %), while at  
21  
22 10 higher BAC levels ( $\geq 0.09$  %) impairment seems to increase quite linearly with task  
23  
24 11 complexity.<sup>14-17</sup> For comparison, one standard UK drink approximates a BAC of 0.02 % for a  
25  
26 12 male (age: 40, body weight: 80 kg) or 0.04 % for a female (age: 40, body weight: 60 kg).<sup>18</sup>  
27  
28 13 For both, a BAC of  $\geq 0.09$  % would be surpassed after three drinks. In a six-hour time  
29  
30 14 window, a BAC of  $\geq 0.09$  % would be present after nine (male) or six (female) drinks.  
31  
32 15 Hangover episodes, defined as an adverse mental and physical state experienced after heavy  
33  
34 16 drinking when the BAC level returns to zero,<sup>5(p85)</sup> include symptoms that may be related to  
35  
36 17 performance decrements, such as headache, nausea, drowsiness, and sensitivity to  
37  
38 18 light/sound.<sup>15, 19, 20</sup>

39  
40 19 Alcohol consumption may influence activity performance in a variety of domains,  
41  
42 20 including the occupational sphere. Regarding employees' alcohol consumption, one may  
43  
44 21 distinguish between workforce overall alcohol consumption (consumption regardless of  
45  
46 22 context) and work-related alcohol consumption (consumption prior to or during the workday,  
47  
48 23 as well as in contexts directly related to the work environment or the employment  
49  
50 24 relationship).<sup>5, 21-23</sup> According to Frone's integrative conceptual model of employee substance  
51  
52 25 use and productivity, not showing up at work (absenteeism) and arriving late at work  
53  
54  
55  
56  
57  
58  
59  
60

1 (tardiness) are primarily believed to be affected by off-the-job drinking, while leaving work  
2 early and reduced work performance are thought mainly to be due to on-the-job drinking, that  
3 is, drinking within two hours before work, during breaks, or while performing the job.<sup>5, 24</sup>  
4 However, the model does allow for possible cross-over effects between contexts. Off-the-job  
5 drinking "may indirectly affect performance outcomes to the extent that it causes off-the-job  
6 substance impairment, which when carried into the workplace becomes workplace  
7 impairment".<sup>5(p134)</sup> An association between employees' alcohol consumption and absenteeism  
8 is quite well established in the literature, e.g.,<sup>25</sup>, while alcohol-related presenteeism stands out  
9 as a far more under-researched topic.

10

## 11 **Presenteeism**

12 Presenteeism has been defined in a variety of ways and the concept somewhat suffers  
13 from a "definitional creep".<sup>26(p521)</sup> Two distinct traditions in presenteeism research have been  
14 identified.<sup>26, 27</sup> The first tradition has primarily emphasised the exploration of presenteeism  
15 determinants and studied presenteeism as a chosen behaviour or personal choice. In this  
16 perspective, presenteeism is defined as the act of "showing up for work even when one is  
17 ill",<sup>26(p519)</sup> or "the phenomenon of people who, despite complaints and ill health that should  
18 prompt rest and absence from work, are still turning up at their jobs".<sup>28(p503)</sup> Hence,  
19 presenteeism may be conceived as an alternative to absenteeism and, as such, even as a  
20 health-promoting measure within a return to work framework.<sup>29</sup> The second tradition has been  
21 more oriented towards consequences of this behaviour, in particular related to productivity  
22 loss. Researchers in this tradition have defined presenteeism as "decreased on-the-job  
23 performance due to the presence of health problems",<sup>30(p548)</sup> "the health-related productivity  
24 loss while at paid work",<sup>31(p351)</sup> or "the measurable extent to which health symptoms,  
25 conditions and diseases adversely affect the work productivity of individuals who choose to



1  
2  
3 1 remain at work".<sup>32(p2)</sup> Evidently, the first tradition treats presenteeism as a behaviour,  
4  
5 2 regardless of its consequences, while the second tradition claims that adverse performance  
6  
7 3 outcomes are inherent in the conceptualisation of presenteeism.  
8  
9

10 4 It is plausible to conceive that a variety of health conditions do not result in  
11  
12 5 productivity impairment and, from an organisational perspective, it may be argued that  
13  
14 6 situations in which employees attend work while sick become of interest primarily when  
15  
16 7 performance decrements are involved. In this systematic review, we consider presenteeism as  
17  
18 8 reduced on-the-job performance due to health problems.<sup>30</sup> As such, presenteeism constitutes a  
19  
20 9 link between on-the-job productivity and employee health,<sup>30</sup> addressing the grey area between  
21  
22 10 optimal work performance and the absence of productivity (i.e., absenteeism).<sup>26</sup> Within this  
23  
24 11 frame, alcohol-related presenteeism can be conceptualised as the presence of a positive  
25  
26 12 association between alcohol consumption and impaired work performance (or conversely as a  
27  
28 13 negative association between alcohol consumption and work performance). Alcohol-related  
29  
30 14 presenteeism is thus operationalised as the product of a relationship between two variables  
31  
32 15 (exposure: alcohol consumption, outcome: work performance) rather than a single variable  
33  
34 16 (attending work while sick), rendering it possible to retain the notion of work performance as  
35  
36 17 inherent in the phenomenon of presenteeism without conflating cause and effect.  
37  
38  
39  
40  
41

42 18 Performance outcomes at work comprise several phenomena related to productivity.  
43  
44 19 The concept of presenteeism is most directly associated with task performance. However,  
45  
46 20 performance may as well be related to contextual performance (such as working extra hours  
47  
48 21 and helping coworkers), counterproductive behaviour (such as workplace aggression and  
49  
50 22 property damage) and issues related to job safety, such as injuries resulting from  
51  
52 23 accidents.<sup>5(p132)</sup> A recent Norwegian study revealed that employees' alcohol consumption was  
53  
54 24 a major concern relating to safety issues,<sup>33</sup> and several studies support an association between  
55  
56 25 alcohol and occupational injuries.<sup>34-36</sup> However, in the context of the present review, we  
57  
58  
59  
60

1  
2  
3 1 focused on work performance related to task performance, which can be conceived of as most  
4  
5 2 directly related to on-the-job productivity.  
6

7  
8 3 Absenteeism and presenteeism have been found to be moderately correlated, and  
9  
10 4 related by baseline presenteeism being a risk factor for future absenteeism.<sup>37</sup> Several authors  
11  
12 5 have argued that presenteeism may carry more substantial societal costs than absenteeism.  
13  
14 6 Hemp stated that "the illnesses people take with them to work (...) usually account for a  
15  
16 7 greater loss in productivity because they are so prevalent, so often go untreated, and typically  
17  
18 8 occur during peak working years. Those indirect costs have long been largely invisible to  
19  
20 9 employers".<sup>38(p2)</sup>  
21  
22

23  
24 10 Known predictors of presenteeism include diseases and disorders (e.g.,  
25  
26 11 musculoskeletal problems, depression and anxiety), certain individual characteristics (e.g.,  
27  
28 12 gender, age, job satisfaction, stress and family status), and factors related to the organisational  
29  
30 13 environment (e.g., employment security, work schedules, workload, managerial support,  
31  
32 14 corporate culture and leadership style).<sup>27</sup> Knowledge of mechanisms underlying presenteeism  
33  
34 15 is, however, still quite limited. In particular, the impact of individual health risks or  
35  
36 16 combinations of risks should be researched more extensively.<sup>30</sup>  
37  
38  
39

40 17

## 41 42 18 **Rationale and aim**

43  
44 19 Some studies have explored alcohol-related presenteeism, either directly or indirectly.  
45  
46 20 There is, however, a lack of synthesised knowledge, rendering it difficult to assess the  
47  
48 21 evidence of a possible association between employee alcohol consumption and work  
49  
50 22 performance. In their review of relationships between psychological, physical and behavioural  
51  
52 23 health and work performance, Ford et al. found alcohol consumption to be weakly associated  
53  
54 24 with work performance problems.<sup>39</sup> However, this conclusion was based solely on 12 studies  
55  
56 25 identified in two scientific databases in 2011. It seems imperative to generate new  
57  
58  
59  
60

1  
2  
3 1 accumulated knowledge in order to aid in deciding whether and how workplace interventions  
4  
5 2 and Workplace Health Promotion Programs (WHPP) should include an emphasis on alcohol  
6  
7 3 consumption.  
8  
9

10 4 The aim of this review was to explore whether evidence in the research literature supports  
11  
12 5 the notion of alcohol-related presenteeism, i.e., whether evidence supports an association  
13  
14 6 between employee alcohol consumption (overall, as well as work-related) and impaired work  
15  
16 7 performance.  
17  
18  
19 8

## 9 **METHODS**

### 10 **Protocol and registration**

11 This review is registered in the International prospective register of systematic reviews  
12 (PROSPERO, ID: CRD42017059620), and is part of the Norwegian national WIRUS project  
13 (Workplace Interventions preventing Risky Use of alcohol and Sick leave). Original research  
14 from the WIRUS project is published elsewhere.<sup>9, 23, 40</sup>  
15  
16

### 16 **Eligibility criteria**

17 Studies exploring alcohol-related presenteeism, i.e., the relationship between alcohol  
18 consumption (exposure) and work performance (outcome) among employees (population)  
19 were included in this review. Included studies had to satisfy the following criteria: (i) *type of*  
20 *study* (observational study, e.g., case-control, prospective cohort or cross-sectional study); (ii)  
21 *type of participants* (the study reported results from a sample of employees, defined as all  
22 salaried persons between 16 and 70 years of age, both workers and managers, regardless of  
23 employment sector or branch); (iii) *type of measures/tests* (the study reported one or more  
24 statistical test(s) of a relationship between a measure of alcohol consumption and a measure  
25 of work performance); (iv) *type of publication and language* (the study was reported as a full  
26  
27  
28  
29  
30  
31  
32  
33  
34  
35  
36  
37  
38  
39  
40  
41  
42  
43  
44  
45  
46  
47  
48  
49  
50  
51  
52  
53  
54  
55  
56  
57  
58  
59  
60

1 text empirical research article published in English or a Scandinavian language in a peer-  
2 reviewed scientific journal); and (v) *time* (the study was published year 1990 or later).

3 Studies were excluded if they (i) reported results from samples in which employees  
4 were mixed with other groups (e.g., full-time students, unemployed), unless results were  
5 reported independently for each group, and/or (ii) reported tests where alcohol and/or work  
6 performance were analysed in combination with other factors (e.g., if on-the-job performance  
7 was analysed in combination with absenteeism within a wider productivity variable). Time  
8 restrictions were set a priori due to drinking behaviour, in particular, resulting from complex  
9 and interacting antecedents that are susceptible to changes over time.<sup>24, 41, 42</sup> Hence, very old  
10 studies may suffer from low external validity.

## 11 12 **Literature search**

13 A primary database search strategy (based on a Medline structure, see Supplementary  
14 File 1) was developed and applied in seven scientific databases (Medline; Web of Science;  
15 PsycINFO; Cinahl; Amed; Embase; Swemed+). Where necessary, the search strategy was  
16 adapted to each database. The primary (Medline) strategy comprised a total of 31 steps, of  
17 which 20 were abstract-level text searches, 7 were based on MeSH terms (Medical Subject  
18 Headings, Topics, or similar terms), and the remaining were combinations of results applying  
19 Boolean operators (OR; AND). First, studies relating to the population (employees) were  
20 searched for (employee\*; employed; worker\*; workforce; work [MeSH]; employment  
21 [MeSH]), followed by studies relating to the exposure (alcohol consumption) (alcohol\*;  
22 drink\*; drunk\*; hangover; "hang over"; alcohol drinking [MeSH]; binge drinking [MeSH];  
23 drinking behavior [MeSH]), and the outcome (work performance) (presenteeism; "job  
24 productiv\*"; "work productiv\*"; "job capacity"; "work capacity"; "job ability"; "work  
25 ability"; "job impair\*"; "work impair\*"; "job performance"; "work performance";

1  
2  
3 1 presenteeism [MeSH]; work performance [MeSH]). Finally, search blocks for population,  
4  
5 2 exposure and outcome were combined. Database search results were transferred to EndNote.  
6

7  
8 3 No restrictions were imposed at the search stage. The primary search strategy was  
9  
10 4 pilot tested by three reviewers prior to conducting the main searches. Databases were initially  
11  
12 5 searched in September 2017. An updated search was conducted in October 2018.  
13  
14 6 Additionally, reference lists in included studies were hand searched for potential relevant  
15  
16 7 studies.  
17  
18

## 19 8 20 21 9 **Study and data selection**

22  
23  
24 10 After searching the seven databases, hand searching in reference lists in included  
25  
26 11 studies and removing duplicates, identified studies were screened for relevance on a  
27  
28 12 title/abstract level. Study selection was based on the results of combining the three main  
29  
30 13 search blocks in the database search strategy (population, exposure and outcome). For quality  
31  
32 14 assurance of the search strategy and eligibility criteria, the first 20 studies were independently  
33  
34 15 screened by three reviewers. The remaining studies were independently screened by two  
35  
36 16 reviewers. Initial disagreements on eligibility were resolved through discussion. The  
37  
38 17 reviewers reached consensus. Hence, it was not necessary to consult with a third reviewer.  
39  
40 18 Potentially relevant studies were independently assessed in full text format for eligibility by  
41  
42 19 two reviewers. Initial disagreements were resolved through discussion, without the need for  
43  
44 20 consulting a third reviewer.  
45  
46  
47  
48

## 49 21 50 51 22 **Data extraction**

52  
53  
54 23 Data from the included studies were extracted independently by two reviewers.  
55  
56 24 Disagreements were resolved through discussion, without the need to consult a third reviewer.  
57  
58  
59  
60

1 We were unable to locate standardised extraction forms appropriate for this review.

2 Therefore, we developed and applied two extraction forms.

3 First, on a study characteristics extraction form, the following pieces of information were  
4 extracted from each included article: title, author(s), year of publication, characteristics of  
5 study sample, study setting, number of participants included in the study (study sample size),  
6 gender and age distribution, study design, data collection method(s), information on the  
7 measures of exposure and outcome, and the number of tested associations relevant to the  
8 review research question. Second, on an association characteristics extraction form, the  
9 following pieces of information were extracted about each relevant association: type of  
10 statistical test, number of participants included in association (association sample size), effect  
11 size, p-value and/or confidence interval, and information on the measures of exposure and  
12 outcome. Extracted data were entered in spreadsheets for further analysis.

### 14 **Quality assessment**

15 Searches indicated that studies fulfilling the inclusion criteria were characterised by  
16 different designs, and by containing several statistical associations between alcohol  
17 consumption and presenteeism. Included studies were characterised by exploring broader  
18 aims related to health and productivity, while this review emphasises the relationship between  
19 alcohol and work performance in particular. Hence, it was deemed inappropriate to conduct  
20 overall quality assessment of each study. Instead, relevant tested associations in the included  
21 studies were assessed on two key domains: (i) sample size (low quality = <500; moderate  
22 quality = 500-999; high quality =  $\geq 1000$ ), and (ii) risk of confounding (level of adjustment,  
23 the extent to which associations between exposure and outcome were controlled for possible  
24 confounding variables: low quality = unadjusted or unclear; moderate quality = adjusted for  
25 individual *or* work-related/environmental factor(s); high quality = adjusted for individual *and*

1  
2  
3 1 work-related/environmental factors). The sample size thresholds were based on the  
4  
5 2 assumption that alcohol-related presenteeism is a relatively low-prevalent phenomenon in the  
6  
7 3 workforce. The study of rare events requires greater statistical strength than the study of  
8  
9 4 frequent events.<sup>43</sup> Samples consisting of less than 500 observations were defined as small.  
10  
11 5 Sample size categorisations were similar to thresholds applied in a recent association-based  
12  
13 6 review of alcohol-related absenteeism.<sup>25</sup> Each association was ascribed an overall quality  
14  
15 7 judgement (low, moderate or high) based on the assessment of the two key domains,  
16  
17 8 according to the "worst score counts" algorithm recommended by the COSMIN guidelines.<sup>44</sup>  
18  
19 9 Hence, an association's overall score was equal to its lowest domain assessment. High-quality  
20  
21 10 associations were thus characterised by being based on at least 1000 observations and being  
22  
23 11 adjusted for individual (e.g., gender; age; personality; disease conditions; drug use) as well as  
24  
25 12 work-related/environmental factors (e.g., work position; work schedule; job characteristics).

30  
31 13 The quality assessment procedure was pilot tested on a random sample of 10  
32  
33 14 associations. Quality assessments were performed independently by two reviewers.  
34  
35 15 Consensus was reached and initial disagreements were resolved through discussion, without  
36  
37 16 the need for consulting a third reviewer.  
38  
39  
40  
41  
42

## 43 18 **Analysis**

44  
45  
46 19 Measures of exposure (alcohol consumption) as well as measures of outcome (work  
47  
48 20 performance) displayed considerable heterogeneity between the included studies. As a result  
49  
50 21 of the heterogeneous nature of the included data, meta-analyses were deemed inappropriate.  
51  
52 22 Included data (associations) were instead analysed with frequency tables and cross  
53  
54 23 tabulations. First, associations were sorted into a frequency table by quality level and overall  
55  
56 24 association characteristics. Next, four contingency tables were constructed in order to explore  
57  
58 25 properties of the identified associations more thoroughly: (i) direction and significance, (ii)

1 quality and direction, (iii) publication year and quality, and (iv) significance and quality. The  
2 four 2x2 tables were analysed by means of odds ratios (with 95 % confidence intervals) and  
3 chi square tests of independence (with phi coefficients). Finally, measurements of alcohol  
4 consumption and work performance applied in the included studies were categorised into  
5 subgroups.

### 6 7 **Patient and public involvement**

8 No patients or public were involved in this review study.

## 9 10 **RESULTS**

### 11 **Overview of the evidence**

12 Searches in the seven databases resulted in 540 articles (Medline: n = 135; Web of  
13 Science: n = 128; PsycINFO: n = 63; Cinahl: n = 22; Amed: n = 3; Embase: n = 189;  
14 Swemed+: n = 0). Hand searching in reference lists resulted in an additional nine articles.  
15 After duplicate removal (n = 282), a total of 267 unique articles remained. Application of the  
16 eligibility criteria resulted in exclusion of 158 studies, leaving 109 potentially relevant  
17 articles.

18 Eighty-three studies were excluded after being subjected to full text assessment. The  
19 vast majority of these were excluded as a result of not reporting a statistical test of an  
20 association between alcohol consumption and work performance (n = 52), or because of  
21 publication type (n = 24). Articles not reporting tests of associations were typically  
22 characterised by (i) not studying variables that conceptually could be defined as alcohol  
23 consumption and/or work performance, and (ii) analysing alcohol consumption and/or work  
24 performance in combination with other factors, rendering it impossible to isolate the



1  
2  
3 1 association of interest. Alcohol being analysed in combination with smoking/other lifestyle  
4  
5 2 factors, and work performance being analysed in combination with absenteeism constitute  
6  
7 3 typical examples. Articles excluded on the basis of publication type were typically conference  
8  
9 4 papers. The study selection process resulted in 26 studies satisfying all inclusion criteria, and  
10  
11 5 is presented in Figure 1.  
12  
13  
14  
15  
16  
17  
18  
19  
20  
21  
22

17 7 [Figure 1 about here]  
18  
19  
20  
21  
22

23  
24 10 The 26 included studies were based on data from 92 730 employees from a total of 15  
25  
26 11 countries (Australia, China, Czech republic, Denmark, Finland, Greece, Ireland, Japan, the  
27  
28 12 Netherlands, Norway, Portugal, Slovenia, Sweden, Switzerland and the USA). Employees in  
29  
30 13 the USA constituted the samples in half of the studies (13 of 26). The vast majority of studies  
31  
32 14 (21 of 26) were based on cross-sectional research designs. A total of 132 associations between  
33  
34 15 alcohol consumption and work performance were tested in the 26 included studies.  
35  
36 16 Characteristics of the included studies are presented in Table 1. Characteristics of the included  
37  
38 17 associations are presented in Supplementary File 2.  
39  
40  
41  
42  
43  
44  
45  
46  
47  
48  
49  
50  
51  
52  
53  
54  
55  
56  
57  
58  
59  
60

Table 1

*Characteristics of the included studies (n = 26) with measurements and included associations (n = 132)*

| Article/study (author, reference, year,)    | Sample                                | Design          | Alcohol measures                                 | Presenteeism measures                                 | Included association(s) (n, ID) |
|---------------------------------------------|---------------------------------------|-----------------|--------------------------------------------------|-------------------------------------------------------|---------------------------------|
| Adler <i>et al.</i> , <sup>45</sup> 2011    | USA: Military veterans (n = 473)      | Cross-sectional | Binge drinking episodes past 3 months            | Work Limitations Questionnaire (WLQ)                  | n = 10 ([1-10])                 |
| Airilia <i>et al.</i> , <sup>46</sup> 2012  | Finland: Fire fighters (n = 403)      | Longitudinal    | Drinking frequency                               | Work Ability Index (WAI), subdimensions               | n = 6 ([11-16])                 |
| Fisher <i>et al.</i> , <sup>47</sup> 2000   | USA: Military personnel (n = 5389)    | Cross-sectional | Drinking frequency and quantity during past year | Number of impaired work ability days during past year | n = 7 ([17-23])                 |
| Karlsson <i>et al.</i> , <sup>48</sup> 2010 | Sweden: Various occupations (n = 341) | Longitudinal    | Weekly alcohol intake (grams)                    | Prognosis of work ability, 6 months                   | n = 2 ([24],[25])               |
| Kessler & Frank, <sup>49</sup> 1997         | USA: Various occupations (n = 4091)   | Cross-sectional | DSM-III-R diagnosis (alcohol abuse/dependence)   | Number of work cutback days during past 30 days       | n = 2 ([26],[27])               |

1  
2  
3  
4  
5  
6  
7  
8  
9  
10  
11  
12  
13  
14  
15  
16  
17  
18  
19  
20  
21  
22  
23  
24  
25  
26  
27  
28  
29  
30  
31  
32  
33  
34  
35  
36  
37  
38  
39  
40  
41  
42  
43  
44  
45  
46

|                                            |                                                                                        |                 |                                             |                                                                                   |                 |
|--------------------------------------------|----------------------------------------------------------------------------------------|-----------------|---------------------------------------------|-----------------------------------------------------------------------------------|-----------------|
| Kim <i>et al.</i> , <sup>50</sup> 2013     | USA: Fibromyalgia patients in various occupations (n = 946)                            | Cross-sectional | Number of drinks per week                   | Fibromyalgia Impact Questionnaire (FIQ), item job ability                         | n = 8 ([28-35]) |
| Kirkham <i>et al.</i> , <sup>51</sup> 2015 | USA: Computer manufacturer employees (n = 17089)                                       | Longitudinal    | CAGE questionnaire, at-risk vs. not at risk | Work Limitations Questionnaire (WLQ)                                              | n = 3 ([36-38]) |
| Odlaug <i>et al.</i> , <sup>52</sup> 2016  | 8 European countries: Patients with alcohol dependence, various occupations (n = 2979) | Cross-sectional | Drinking amount, past 12 months             | Work Productivity and Activity Impairment Questionnaire (WPAI), presenteeism item | n = 1 ([39])    |
| Pensola <i>et al.</i> , <sup>53</sup> 2016 | Finland: People with multisite pain, various occupations (n = 3884)                    | Cross-sectional | Hangover frequency, past 12 months          | Current work ability (0-10)                                                       | n = 8 ([40-47]) |

|    |                                          |                      |                    |                       |                       |                   |
|----|------------------------------------------|----------------------|--------------------|-----------------------|-----------------------|-------------------|
| 1  |                                          |                      |                    |                       |                       |                   |
| 2  |                                          |                      |                    |                       |                       |                   |
| 3  | Richmond <i>et al.</i> , <sup>54</sup>   | USA: Government      | Quasi-experimental | Alcohol Use           | Workplace Outcome     | n = 1 ([48])      |
| 4  | 2016                                     | employees (n = 344)  |                    | Disorders             | Suite, presenteeism   |                   |
| 5  |                                          |                      |                    | Identification Test   | scale                 |                   |
| 6  |                                          |                      |                    | (AUDIT)               |                       |                   |
| 7  |                                          |                      |                    |                       |                       |                   |
| 8  |                                          |                      |                    |                       |                       |                   |
| 9  |                                          |                      |                    |                       |                       |                   |
| 10 | Schou <i>et al.</i> , <sup>55</sup> 2017 | Norway: Various      | Cross-sectional    | Drinking frequency    | Number of             | n = 1 ([49])      |
| 11 |                                          | occupations (n =     |                    |                       | presenteeism          |                   |
| 12 |                                          | 1407)                |                    |                       | episodes, past 12     |                   |
| 13 |                                          |                      |                    |                       | months                |                   |
| 14 |                                          |                      |                    |                       |                       |                   |
| 15 |                                          |                      |                    |                       |                       |                   |
| 16 |                                          |                      |                    |                       |                       |                   |
| 17 |                                          |                      |                    |                       |                       |                   |
| 18 | Steggmann <i>et al.</i> , <sup>56</sup>  | China: Cycle haulers | Cross-sectional    | Alcohol               | Supervisor's estimate | n = 1 ([50])      |
| 19 | 1997                                     | (n = 45)             |                    | intake/intensity (ml) | of worker's           |                   |
| 20 |                                          |                      |                    |                       | contribution          |                   |
| 21 |                                          |                      |                    |                       |                       |                   |
| 22 |                                          |                      |                    |                       |                       |                   |
| 23 |                                          |                      |                    |                       |                       |                   |
| 24 | Tsuchiya <i>et al.</i> , <sup>57</sup>   | Japan: Community     | Cross-sectional    | DSM-IV diagnosis      | WHO Health and        | n = 2 ([51],[52]) |
| 25 | 2012                                     | workers (n = 530)    |                    | (alcohol              | Work Performance      |                   |
| 26 |                                          |                      |                    | abuse/dependence)     | Questionnaire (HPQ)   |                   |
| 27 |                                          |                      |                    |                       |                       |                   |
| 28 |                                          |                      |                    |                       |                       |                   |
| 29 |                                          |                      |                    |                       |                       |                   |
| 30 | van Scheppingen <i>et</i>                | Netherlands: Dairy   | Cross-sectional    | Weekly alcohol        | Presenteeism          | n = 1 ([53])      |
| 31 | <i>al.</i> , <sup>58</sup> 2014          | company employees    |                    | intake                | frequency             |                   |
| 32 |                                          | (n = 629)            |                    |                       |                       |                   |
| 33 |                                          |                      |                    |                       |                       |                   |
| 34 |                                          |                      |                    |                       |                       |                   |
| 35 |                                          |                      |                    |                       |                       |                   |
| 36 |                                          |                      |                    |                       |                       |                   |
| 37 |                                          |                      |                    |                       |                       |                   |
| 38 |                                          |                      |                    |                       |                       |                   |
| 39 |                                          |                      |                    |                       |                       |                   |
| 40 |                                          |                      |                    |                       |                       |                   |
| 41 |                                          |                      |                    |                       |                       |                   |
| 42 |                                          |                      |                    |                       |                       |                   |
| 43 |                                          |                      |                    |                       |                       |                   |
| 44 |                                          |                      |                    |                       |                       |                   |
| 45 |                                          |                      |                    |                       |                       |                   |
| 46 |                                          |                      |                    |                       |                       |                   |

1  
2  
3  
4  
5  
6  
7  
8  
9  
10  
11  
12  
13  
14  
15  
16  
17  
18  
19  
20  
21  
22  
23  
24  
25  
26  
27  
28  
29  
30  
31  
32  
33  
34  
35  
36  
37  
38  
39  
40  
41  
42  
43  
44  
45  
46

|                                             |                                                        |                 |                                                     |                                                     |                    |
|---------------------------------------------|--------------------------------------------------------|-----------------|-----------------------------------------------------|-----------------------------------------------------|--------------------|
| Yu <i>et al.</i> , <sup>59</sup> 2015       | China: Petrochemical corporation employees (n = 1506)  | Cross-sectional | Current alcohol drinker (yes/no)                    | Presenteeism during past 4 weeks (yes/no)           | n = 2 ([54],[55])  |
| Friedman <i>et al.</i> , <sup>60</sup> 1992 | USA: Supermarket employees (n = 860)                   | Cross-sectional | DSM-III diagnosis alcohol abuse                     | Overall job performance (supervisor ratings)        | n = 14 ([56-69])   |
| Boles <i>et al.</i> , <sup>61</sup> 2004    | USA: Employees in a large national employer (n = 2264) | Cross-sectional | CAGE questionnaire, at-risk vs. not at risk         | WPAI; % presenteeism during past week               | n = 3 ([70-72])    |
| Blum <i>et al.</i> , <sup>62</sup> 1993     | USA: Employees, various occupations (n = 136)          | Cross-sectional | Monthly frequency x typical quantity (past 30 days) | Technical job performance                           | n = 12 ([73-84])   |
| Burton <i>et al.</i> , <sup>63</sup> 2005   | USA: Financial services employees (n = 28375)          | Cross-sectional | At-risk (>14/wk) vs no-risk drinking                | Work Limitations Questionnaire (WLQ), short version | n = 5 ([85-89])    |
| Lim <i>et al.</i> , <sup>64</sup> 2000      | Australia: Employees, various occupations (n = 4579)   | Cross-sectional | DSM-IV diagnosis alcohol abuse                      | Number of work cutback days past month              | n = 2 ([90], [91]) |

|    |                                          |                      |                 |                         |                        |                      |
|----|------------------------------------------|----------------------|-----------------|-------------------------|------------------------|----------------------|
| 1  |                                          |                      |                 |                         |                        |                      |
| 2  |                                          |                      |                 |                         |                        |                      |
| 3  | Lowmaster <i>et al.</i> , <sup>65</sup>  | USA: Police officers | Cross-sectional | Personality             | Supervisor ratings of  | n = 3 ([92]-[94])    |
| 4  | 2012                                     | (n = 85)             |                 | Assessment              | overall job            |                      |
| 5  |                                          |                      |                 | Inventory, subscale     | performance            |                      |
| 6  |                                          |                      |                 | Alcohol Problems        |                        |                      |
| 7  |                                          |                      |                 | Scale (ALC)             |                        |                      |
| 8  |                                          |                      |                 |                         |                        |                      |
| 9  |                                          |                      |                 |                         |                        |                      |
| 10 |                                          |                      |                 |                         |                        |                      |
| 11 |                                          |                      |                 |                         |                        |                      |
| 12 | Moore <i>et al.</i> , <sup>66</sup> 2000 | USA: Manufacturing   | Cross-sectional | CAGE questionnaire,     | Time at work spent     | n = 13 ([95]-[107])  |
| 13 |                                          | company employees    |                 | at-risk vs. not at risk | goofing off            |                      |
| 14 |                                          | (n = 2279)           |                 |                         |                        |                      |
| 15 |                                          |                      |                 |                         |                        |                      |
| 16 |                                          |                      |                 |                         |                        |                      |
| 17 |                                          |                      |                 |                         |                        |                      |
| 18 | Ames <i>et al.</i> , <sup>21</sup> 1997  | USA: Manufacturing   | Longitudinal    | Frequency drinking      | Frequency sleeping     | n = 14 ([108]-[121]) |
| 19 |                                          | plant employees (n = |                 | before/during work      | on the job and         |                      |
| 20 |                                          | 832)                 |                 | and hangovers past      | task/co-worker         |                      |
| 21 |                                          |                      |                 | year                    | problems past year     |                      |
| 22 |                                          |                      |                 |                         |                        |                      |
| 23 |                                          |                      |                 |                         |                        |                      |
| 24 |                                          |                      |                 |                         |                        |                      |
| 25 |                                          |                      |                 |                         |                        |                      |
| 26 | Furu <i>et al.</i> , <sup>67</sup> 2018  | Finland: Workers in  | Cross-sectional | Excessive drinking      | Current work ability   | n = 2 ([122], [123]) |
| 27 |                                          | solvent-exposed      |                 | (AUDIT-C, scores 7-     | compared to lifetime   |                      |
| 28 |                                          | fields (n = 1622)    |                 | 12)                     | best (0-10)            |                      |
| 29 |                                          |                      |                 |                         |                        |                      |
| 30 |                                          |                      |                 |                         |                        |                      |
| 31 |                                          |                      |                 |                         |                        |                      |
| 32 | Aas <i>et al.</i> , <sup>40</sup> 2017   | Norway: Employees,   | Cross-sectional | Drinking frequency      | Quantity               | n = 4 ([124]-[127])  |
| 33 |                                          | various occupations  |                 | and binge drinking      | presenteeism during    |                      |
| 34 |                                          | (n = 3278)           |                 | past year (AUDIT 1,     | past 7 days (degree 0- |                      |
| 35 |                                          |                      |                 | 3)                      | 10)                    |                      |
| 36 |                                          |                      |                 |                         |                        |                      |
| 37 |                                          |                      |                 |                         |                        |                      |
| 38 |                                          |                      |                 |                         |                        |                      |
| 39 |                                          |                      |                 |                         |                        |                      |
| 40 |                                          |                      |                 |                         |                        |                      |
| 41 |                                          |                      |                 |                         |                        |                      |
| 42 |                                          |                      |                 |                         |                        |                      |
| 43 |                                          |                      |                 |                         |                        |                      |
| 44 |                                          |                      |                 |                         |                        |                      |
| 45 |                                          |                      |                 |                         |                        |                      |
| 46 |                                          |                      |                 |                         |                        |                      |

1  
2  
3  
4  
5  
6  
7  
8  
9  
10  
11  
12  
13  
14  
15  
16  
17  
18  
19  
20  
21  
22  
23  
24  
25  
26  
27  
28  
29  
30  
31  
32  
33  
34  
35  
36  
37  
38  
39  
40  
41  
42  
43  
44  
45  
46

|                                                    |                                     |                 |                                                    |                                                             |                     |
|----------------------------------------------------|-------------------------------------|-----------------|----------------------------------------------------|-------------------------------------------------------------|---------------------|
| van den Berg <i>et al.</i> , <sup>68</sup><br>2017 | Netherlands: Health<br>care workers | Cross-sectional | Excessive alcohol<br>intake (>10 drinks a<br>week) | Current work ability<br>compared to lifetime<br>best (0-10) | n = 5 ([128]-[132]) |
|----------------------------------------------------|-------------------------------------|-----------------|----------------------------------------------------|-------------------------------------------------------------|---------------------|

For peer review only

## 1 **Quality of the included data**

2           Ninety-three of the 132 associations (71 %) were based on samples smaller than 1000  
3 employees. Approximately half of the associations were unadjusted (n = 63; 48 %), while 29  
4 associations (22 %) were adjusted for individual factors as well as for work-  
5 related/environmental factors. By applying the "worst score counts" algorithm, 80  
6 associations (61 %) were judged as being of low quality, 38 associations (29 %) were of  
7 moderate quality, while 14 associations (11 %) were characterised by high quality. Results  
8 from quality assessment of the included associations are presented in Supplementary File 3.

## 10 **Direction, significance, quality and time**

11           One-hundred-two of the 132 tested associations (77 %) indicated a positive  
12 relationship between alcohol consumption and work performance, i.e., implying that higher  
13 levels of consumption were associated with higher levels of performance impairment.  
14 Approximately half of these (n = 56, 55 %) were statistically significant. The majority of  
15 positive associations was judged to be of low quality (n = 70, 69 %), followed by moderate (n  
16 = 23, 22 %) and high quality (n = 9, 9 %). For instance, in a sample of employees in the USA,  
17 Kirkham *et al.*<sup>51</sup> found that risky drinking, as measured with the CAGE questionnaire,<sup>69</sup> was  
18 associated with impaired work performance, measured with the Work Limitations  
19 Questionnaire,<sup>70</sup> both overall (ID36,  $\beta = .20, p < .001$ ) as well as among those aged <45 (ID37,  
20  $\beta = .22, p < .001$ ) and  $\geq 45$  (ID38,  $\beta = .20, p < .001$ ). Among Finnish employees, Pensola *et*  
21 *al.*<sup>53</sup> found that high hangover frequency (at least six hangovers during the past 12 months),  
22 compared to low frequency (no alcohol or less than six hangovers during the past 12 months),  
23 was associated with moderate or poor self-reported work ability (ID41, PRR = 1.15, 95% CI:  
24 1.0, 1.3). In a study of Norwegian employees, Aas *et al.*<sup>40</sup> found that higher binge drinking  
25 frequency (measured with a single item from the AUDIT)<sup>10, 13</sup> was positively related to the



1 experienced degree of impaired work performance (measured with a single item from the  
2 Work Productivity and Activity Impairment questionnaire)<sup>71</sup> during the past seven days  
3 (ID127,  $\beta = .06, p < .01$ ).

4 Twenty-five of the 132 tested associations (19 %) indicated a negative relationship,  
5 i.e., implying that higher levels of alcohol consumption were associated with lower  
6 performance impairment (higher work performance). Only two of these associations were  
7 statistically significant, and both of these were of low quality. These two associations (ID66,  $r$   
8  $= .10, p < .01$ , and ID68,  $r = .09, p < .01$ , in Friedman *et al.*<sup>60</sup>) tested the relationship between  
9 duration of alcohol use and overall work performance, and found that longer duration, as  
10 opposed to shorter duration, was associated with higher work performance.

11 Five associations (4 %) were not possible to classify as either positive or negative.  
12 They were characterised by (i) finding no differences in work performance between compared  
13 alcohol consumption groups (ID102,  $M_{\text{diff}} = 0.0, p = .68$ , in Moore *et al.*<sup>66</sup>; ID130, OR = 1.00,  
14  $p = \text{ns}$ , in van den Berg *et al.*<sup>68</sup>); (ii) by finding significant differences between multiple  
15 consumption groups, but without a consistent positive/negative pattern (ID28, unclear effect  
16 size,  $p < .001$ ), and ID29, unclear effect size,  $p = .03$ , in Kim *et al.*<sup>50</sup>); or (iii) by finding a J-  
17 shaped pattern where abstainers scored comparable to moderate-level drinkers on impaired  
18 performance (i.e., higher than low-level drinkers), but still lower than heavy drinkers (ID98,  
19 unclear effect size,  $p < .05$ , in Moore *et al.*<sup>66</sup>). The identified associations, sorted by quality  
20 level and overall association characteristics, are presented in Table 2.

Table 2

Identified associations (n = 132) according to direction/significance and assessed quality level

| Quality level | Direction and significance of associations                                                                                                                                                     |                                               |                                                                                                                                                                  |                                                                   |                    |
|---------------|------------------------------------------------------------------------------------------------------------------------------------------------------------------------------------------------|-----------------------------------------------|------------------------------------------------------------------------------------------------------------------------------------------------------------------|-------------------------------------------------------------------|--------------------|
|               | Significant positive <sup>a</sup> association                                                                                                                                                  | Significant negative <sup>b</sup> association | Non-significant positive association                                                                                                                             | Non-significant negative association                              | Other <sup>c</sup> |
| Low           | [1],[2],[3],[4],[5],[10],[12],[17],[19],[26],[39],[49],[51],[54],[55],[56],[58],[59],[60],[62],[64],[67],[69],[77],[78],[81],[82],[83],[84],[95],[96],[97],[118],[119],[120],[121],[124],[125] | [66],[68]                                     | [6],[7],[8],[9],[11],[13],[14],[16],[18],[20],[21],[23],[25],[27],[48],[50],[53],[57],[61],[63],[65],[73],[74],[75],[76],[79],[80],[104],[107],[122],[131],[132] | [15],[22],[24],[92],[93],[94]                                     | [28],[130]         |
| Moderate      | [40],[42],[43],[44],[46],[47],[52],[101],[106],[109],[110],[115],[123]                                                                                                                         |                                               | [34],[35],[45],[91],[100],[103],[105],[117],[128],[129]                                                                                                          | [30],[31],[32],[33],[90],[99],[108],[111],[112],[113],[114],[116] | [29],[98],[102]    |
| High          | [36],[37],[38],[41],[127]                                                                                                                                                                      |                                               | [70],[71],[72],[126]                                                                                                                                             | [85],[86],[87],[88],[89]                                          |                    |

Note. Number in brackets = association ID; <sup>a</sup> Higher level of alcohol associated with higher level of presenteeism; <sup>b</sup> Lower level of alcohol associated with higher level of presenteeism, or higher level of alcohol associated with lower level of presenteeism; <sup>c</sup> Inconsistent direction, no relationship or J-shaped relationship between alcohol and presenteeism

1  
2  
3 1 Positive associations were considerably more likely than negative associations to be  
4  
5 2 statistically significant (OR = 14.00, 95 % CI: 3.1 – 65.5;  $\chi^2$  (1, n = 127) = 17.80,  $p$  = .000,  $\phi$   
6  
7 = .37). On the other hand, negative associations were less likely than positive associations to  
8  
9 3 be of low quality (OR = 0.22, 95 % CI: 0.1 – 0.6;  $\chi^2$  (1, n = 127) = 11.37,  $p$  = .001,  $\phi$  = -.30).  
10  
11 4 Furthermore, recent studies ( $\geq$  year 2000) were more likely than older studies ( $<$  year 2000) to  
12  
13 5 be of moderate or high quality (OR = 2.95, 95 % CI: 1.30 – 6.79;  $\chi^2$  (1, n = 132) = 6.96,  $p$   
14  
15 6 = .008,  $\phi$  = .23). There was no significant relationship between whether associations were  
16  
17 7 significant and whether they were of moderate/high or low quality. The four 2x2 contingency  
18  
19 8 tables are presented in Table 3.  
20  
21 9  
22  
23  
24 10  
25  
26 11  
27  
28 12  
29  
30 13  
31  
32 14  
33  
34 15  
35  
36 16  
37  
38 17  
39  
40 18  
41  
42 19  
43  
44 20  
45  
46 21  
47  
48 22  
49  
50 23  
51  
52 24  
53  
54 25  
55  
56  
57  
58  
59  
60

Table 3

*Cross tabulations of included associations according to direction, significance, quality and publication year*

| <b>Direction</b>                                   |                        |                   | <b>Direction</b>                                        |                   |                 |
|----------------------------------------------------|------------------------|-------------------|---------------------------------------------------------|-------------------|-----------------|
| <b>Significance</b>                                | Positive % (n)         | Negative % (n)    | <b>Quality</b>                                          | Positive % (n)    | Negative % (n)  |
| Significant                                        | 54.9 (56)              | 8.0 (2)           | Moderate/high                                           | 31.4 (32)         | 68.0 (17)       |
| Non-significant                                    | 45.1 (46)              | 92.0 (23)         | Low                                                     | 68.6 (70)         | 32.0 (8)        |
| OR= 14.00*** (3.130 – 65.53)                       |                        |                   | OR = 0.22** (0.08 – 0.55)                               |                   |                 |
| $\chi^2 (1, n = 127) = 17.80, p = .000, phi = .37$ |                        |                   | $\chi^2 (1, n = 127) = 11.37, p = .001, phi = -.30$     |                   |                 |
| <b>Publication year</b>                            |                        |                   | <b>Significance</b>                                     |                   |                 |
| <b>Quality</b>                                     | $\geq$ year 2000 % (n) | < year 2000 % (n) | <b>Quality</b>                                          | Significant % (n) | Non-sign. % (n) |
| Moderate/high                                      | 47.2 (42)              | 23.3 (10)         | Moderate/high                                           | 32.8 (20)         | 44.9 (31)       |
| Low                                                | 52.8 (47)              | 76.7 (33)         | Low                                                     | 67.2 (41)         | 55.1 (38)       |
| OR= 2.95** (1.30 – 6.70)                           |                        |                   | OR= 0.60 <sup>ns</sup> (0.29 – 1.22)                    |                   |                 |
| $\chi^2 (1, n = 132) = 6.96, p = .008, phi = .23$  |                        |                   | $\chi^2 (1, n = 130) = 2.00, p = .157^{ns}, phi = -.12$ |                   |                 |

OR = odds ratio, with 95% confidence interval;  $\chi^2$  = chi square test of independence, with phi coefficient; \*\*  $p < .01$ ; \*\*\*  $p < .001$ ; ns = non-significant

## 1 **Measurements of alcohol consumption and work performance**

2           Categorisation of the applied measurements of alcohol consumption in the 26 included  
3 studies revealed eight subgroups: (i) consumption status (e.g., current alcohol drinker  
4 (yes/no), applied in Yu *et al.*<sup>59</sup>); (ii) drinking frequency (e.g., number of times drunk during  
5 past three months, applied in Ames *et al.*<sup>21</sup>; typical frequency of alcohol consumption during  
6 past year, applied in Aas *et al.*<sup>40</sup>); (iii) drinking intensity (e.g., average number of alcohol  
7 drinks during the past week, applied in Adler *et al.*<sup>45</sup>); (iv) drinking volume (e.g., monthly  
8 frequency x typical quantity during past 30 days, applied in Blum *et al.*<sup>62</sup>); (v) binge drinking  
9 (e.g., binge drinking (6 or more drinks on a single occasion) frequency during past year,  
10 applied in Aas *et al.*<sup>40</sup>); (vi) hangover (e.g., frequency of hangover episodes at work during  
11 past year, applied in Ames *et al.*<sup>21</sup>); (vii) composite instruments comprising several aspects of  
12 consumption, such as frequency, intensity and alcohol problems (e.g., the AUDIT,<sup>10, 13</sup>  
13 applied in Richmond *et al.*<sup>54</sup>); and (viii) alcohol-related diagnosis (e.g., DSM-IV diagnosis of  
14 alcohol abuse, applied in Lim *et al.*<sup>64</sup>).

15           The 26 included studies contained a total of six work performance measurement  
16 categories: (i) overall work performance/impairment (e.g., supervisor ratings of overall work  
17 performance, applied in Lowmaster *et al.*<sup>65</sup>; self-reported current work performance compared  
18 to lifetime best, applied in Furu *et al.*<sup>67</sup>; Work Limitations Questionnaire sum score,<sup>70</sup> applied  
19 in Kirkham *et al.*<sup>51</sup>); (ii) domain-specific work performance/impairment (e.g., Work  
20 Limitations Questionnaire subscale Time management,<sup>70</sup> applied in Adler *et al.*<sup>45</sup>); (iii)  
21 impaired performance quantity (e.g., number of days working below a normal level of  
22 performance during past 12 months, applied in Fisher *et al.*<sup>47</sup>; estimated percent impaired  
23 performance during past week, applied in Boles *et al.*<sup>61</sup>); (iv) impaired performance frequency  
24 (e.g., frequency of impaired performance episodes during past 12 months, applied in Schou *et*  
25 *al.*<sup>55</sup>); (v) prognosis of work performance (e.g., self-assessed probability of good work

- 1  
2  
3 1 performance within frame of 6 months, applied in Karlsson *et al.*<sup>48</sup>); and (vi) work  
4  
5 2 performance status (e.g., impaired work performance during past 4 weeks (yes/no), applied in  
6  
7 3 Yu *et al.*<sup>59</sup>). The identified associations, sorted according to measurements of alcohol  
8  
9 4 consumption and work performance, are presented in Table 4.  
10  
11  
12  
13  
14  
15  
16  
17  
18  
19  
20  
21  
22  
23  
24  
25  
26  
27  
28  
29  
30  
31  
32  
33  
34  
35  
36  
37  
38  
39  
40  
41  
42  
43  
44  
45  
46  
47  
48  
49  
50  
51  
52  
53  
54  
55  
56  
57  
58  
59  
60

For peer review only

Table 4  
Identified associations (n = 132) according to measurements of alcohol consumption and work performance

| Alcohol measure               | Work performance measure                                                                                                                                                                                                                                                                                                      |                                                                                                                                                                     |                                                                                                                                                                                                                                                |                                                    |                                           |                         |
|-------------------------------|-------------------------------------------------------------------------------------------------------------------------------------------------------------------------------------------------------------------------------------------------------------------------------------------------------------------------------|---------------------------------------------------------------------------------------------------------------------------------------------------------------------|------------------------------------------------------------------------------------------------------------------------------------------------------------------------------------------------------------------------------------------------|----------------------------------------------------|-------------------------------------------|-------------------------|
|                               | Overall work performance/impairment                                                                                                                                                                                                                                                                                           | Domain-specific work performance/impairment                                                                                                                         | Impaired performance, quantity                                                                                                                                                                                                                 | Impaired performance, frequency                    | Prognosis work performance                | Work performance status |
| Consumption status            | [66↓*],[67↑*]                                                                                                                                                                                                                                                                                                                 |                                                                                                                                                                     |                                                                                                                                                                                                                                                |                                                    |                                           | [54↑*],[55↑*]           |
| Frequency                     | [11↓ <sup>ns</sup> ],[12↑*],[14↑ <sup>ns</sup> ],[15↓ <sup>ns</sup> ],[58↑*],[59↑*]                                                                                                                                                                                                                                           |                                                                                                                                                                     | [108↓ <sup>ns</sup> ],[109↑*],[124↑*],[126↑ <sup>ns</sup> ]                                                                                                                                                                                    | [49↑*],[113↓ <sup>ns</sup> ],[114↓ <sup>ns</sup> ] | [13↑ <sup>ns</sup> ],[16↑ <sup>ns</sup> ] |                         |
| Quantity                      | [10↑*],[28↓*],[29 <sup>ns</sup> ],[30↓ <sup>ns</sup> ],[31↓ <sup>ns</sup> ],[32↓ <sup>ns</sup> ],[33↓ <sup>ns</sup> ],[34↑ <sup>ns</sup> ],[35↑ <sup>ns</sup> ],[39↑*],[50↑ <sup>ns</sup> ],[85↓ <sup>ns</sup> ],[128↑ <sup>ns</sup> ],[129↑ <sup>ns</sup> ],[130 <sup>ns</sup> ],[131↑ <sup>ns</sup> ],[132↑ <sup>ns</sup> ] | [6↑ <sup>ns</sup> ],[7↑ <sup>ns</sup> ],[8↑ <sup>ns</sup> ],[9↑ <sup>ns</sup> ],[86↓ <sup>ns</sup> ],[87↓ <sup>ns</sup> ],[88↓ <sup>ns</sup> ],[89↓ <sup>ns</sup> ] |                                                                                                                                                                                                                                                | [53↑ <sup>ns</sup> ]                               | [24↓ <sup>ns</sup> ],[25↑ <sup>ns</sup> ] |                         |
| Volume                        | [62↑*],[63↑ <sup>ns</sup> ],[68↓*],[69↑*],[73↑ <sup>ns</sup> ],[74↑ <sup>ns</sup> ],[75↑ <sup>ns</sup> ],[76↑ <sup>ns</sup> ],[77↑*],[78↑*],[79↑ <sup>ns</sup> ],[80↑ <sup>ns</sup> ],[81↑*],[82↑*],[83↑*],[84↑*]                                                                                                             |                                                                                                                                                                     | [17↑*],[18↑ <sup>ns</sup> ],[19↑*],[20↑ <sup>ns</sup> ],[21↑ <sup>ns</sup> ],[22↓ <sup>ns</sup> ],[23↑ <sup>ns</sup> ],[111↓ <sup>ns</sup> ]                                                                                                   | [116↓ <sup>ns</sup> ]                              |                                           |                         |
| Heavy episodic/binge drinking | [5↑*]                                                                                                                                                                                                                                                                                                                         | [1↑*],[2↑*],[3↑*],[4↑*]                                                                                                                                             | [112↓ <sup>ns</sup> ],[125↑*],[127↑*]                                                                                                                                                                                                          | [117↑ <sup>ns</sup> ]                              |                                           | [118↑*]                 |
| Hangover episodes             | [40↑*],[41↑*],[42↑*],[43↑*],[44↑*],[45↑ <sup>ns</sup> ],[46↑*],[47↑*]                                                                                                                                                                                                                                                         |                                                                                                                                                                     | [110↑*]                                                                                                                                                                                                                                        | [115↑*]                                            |                                           | [119↑*],[120↑*],[121↑*] |
| Composite instruments         | [36↑*],[37↑*],[38↑*],[48↑ <sup>ns</sup> ],[64↑*],[65↑ <sup>ns</sup> ],[92↓ <sup>ns</sup> ],[93↓ <sup>ns</sup> ],[94↓ <sup>ns</sup> ],[122↑ <sup>ns</sup> ],[123↑*]                                                                                                                                                            |                                                                                                                                                                     | [70↑ <sup>ns</sup> ],[72↑ <sup>ns</sup> ],[95↑*],[96↑*],[97↑*],[98↑*],[99↓ <sup>ns</sup> ],[100↑ <sup>ns</sup> ],[101↑*],[102↑ <sup>ns</sup> ],[103↑ <sup>ns</sup> ],[104↑ <sup>ns</sup> ],[105↑ <sup>ns</sup> ],[106↑*],[107↑ <sup>ns</sup> ] |                                                    |                                           | [71↑ <sup>ns</sup> ]    |
| Diagnosis                     | [51↑*],[52↑*],[56↑*],[57↑ <sup>ns</sup> ],[60↑*],[61↑ <sup>ns</sup> ]                                                                                                                                                                                                                                                         |                                                                                                                                                                     | [26↑*],[27↑ <sup>ns</sup> ],[90↓ <sup>ns</sup> ],[91↑ <sup>ns</sup> ]                                                                                                                                                                          |                                                    |                                           |                         |

Number in brackets = association ID; assessed quality level indicated by typeface: italic=low, regular=moderate, bold=high; ↑=positive association; ↓=negative association; | =association in non-consistent direction; \*significant association; <sup>ns</sup>non-significant association

1  
2  
3 1 In the 132 included associations, the most frequently applied alcohol measurement was  
4  
5 2 drinking intensity (n = 28, 21 %) and composite instruments (n = 27, 20 %). Overall work  
6  
7 3 performance/impairment (n = 67, 51 %) and quantity of impaired performance (n = 35, 27 %)  
8  
9 4 were the most frequently utilised work performance measures. When exploring the group of  
10  
11 5 associations characterised by being significant positive and of moderate or high quality (n =  
12  
13 6 18), the vast majority of these (n = 15) applied either hangover (n = 9) or composite  
14  
15 7 instruments (n = 6) as alcohol consumption measures.  
16  
17  
18  
19  
20  
21  
22

## 9 **DISCUSSION**

23  
24 10 The aim of this review was to explore whether evidence in the research literature  
25  
26 11 supports the notion of alcohol-related presenteeism, i.e., whether evidence supports an  
27  
28 12 association between employee alcohol consumption and work performance. Twenty-six  
29  
30 13 studies met the eligibility criteria, containing a total of 132 tested associations between  
31  
32 14 alcohol consumption and presenteeism, based on data from 92 730 employees in 15 countries.  
33  
34

35 15 The vast majority of the associations (102 of 132, 77 %) indicated a positive  
36  
37 16 relationship between alcohol consumption and impaired work performance, implying that  
38  
39 17 higher levels of alcohol consumption were associated with higher levels of impaired  
40  
41 18 performance. Furthermore, positive associations were considerably more likely than negative  
42  
43 19 associations to be statistically significant.  
44  
45

46  
47 20 Alcohol use has the potential for influencing cognitive and psychomotor performance,  
48  
49 21 which may explain why employees' alcohol consumption is associated with work  
50  
51 22 performance. In particular, hangover episodes are characterised by symptoms that can induce  
52  
53 23 work impairments (headache, nausea, drowsiness etc.),<sup>15, 19, 20</sup> and alcohol intoxication, at  
54  
55 24 least at higher blood alcohol content, may produce work impairments that increase linearly  
56  
57 25 with task complexity.<sup>14-17</sup> Positive associations between alcohol consumption and  
58  
59  
60



1 performance impairments are not so surprising in light of knowledge on the relationship  
2 between alcohol consumption and absenteeism. In their review, Schou and Moan found that  
3 employees' consumption was positively associated with both short-term and long-term sick  
4 leave.<sup>25</sup> The complementary hypothesis of the relationship between absenteeism and  
5 presenteeism claims that these behaviours are both related to employees' overall health status  
6 and that they are positively associated.<sup>27</sup> Research has demonstrated moderate positive  
7 correlations between absenteeism and presenteeism and that presenteeism may be a risk factor  
8 for future absenteeism.<sup>27, 37</sup>

9 Alcohol measurements based on hangovers and composite instruments were  
10 overrepresented in associations characterised by being significant positive, and of moderate or  
11 high quality. Hangovers tend to result from binge drinking episodes, or drinking shortly  
12 before work. Such short-term impairment-producing consumption may be more predictive of  
13 work impairments than for instance typical drinking frequency, which instead may be more  
14 predictive of long-term ill-health consequences.<sup>72</sup> Composite instruments, such as the  
15 AUDIT,<sup>10, 13</sup> tend to assume a more complex relationship between alcohol, health and  
16 performance than what may be the case for more basic measurements (e.g., drinking  
17 frequency or intensity). Hence, a composite instrument measuring both consumption and  
18 experienced alcohol problems may be more predictive of productivity outcomes such as work  
19 performance.

20 While most alcohol measures in the included studies can be said to capture somewhat  
21 different aspects of alcohol consumption (e.g., frequency, intensity, volume, binge episodes  
22 and hangovers), four studies did report abuse/dependence diagnoses (diagnosis vs. no  
23 diagnosis) as measure of exposure.<sup>49, 57, 60, 64</sup> One may argue that an alcohol-related diagnosis,  
24 focusing on harms and consequences as well as on use, is conceptually different from more  
25 direct measures of consumption. These studies are thus difficult to compare with other studies

1 in this review, even though they do not differ considerable in terms of overall conclusions  
2 regarding the relationship between exposure and outcome. Moreover, these studies are  
3 difficult to interpret in the context of the present review's research question. One may assume  
4 that individuals satisfying the criteria for an alcohol-related diagnosis are indeed characterised  
5 by having high consumption levels. However, the consumption levels of those not satisfying  
6 the diagnostic criteria in these studies remain unknown.

7 The majority of positive associations were judged to be of low quality, and 25 of 132  
8 associations (19 %) even indicated a negative relationship, i.e., implying that higher levels of  
9 alcohol consumption were associated with lower performance impairments (higher  
10 performance). Moreover, five associations were inconsistent, i.e., not possible to classify as  
11 positive or negative, or did not reveal any association between alcohol consumption and work  
12 performance at all. Negative associations were less likely than positive associations to be of  
13 low quality.

14 Only two associations categorised as negative reported statistically significant findings.  
15 These associations, both reported in Friedman *et al.*<sup>60</sup>, tested the relationship between  
16 duration of alcohol use and overall work performance, and found that longer duration (higher  
17 exposure) was associated with lower work impairment. Basically, these results may imply that  
18 more experienced drinkers report lower levels of work impairment than less experienced  
19 drinkers. As such, rather than implying that higher consumption could be related to lower  
20 impairments, they may reflect that experienced drinkers have developed higher tolerance  
21 levels and more sophisticated coping strategies than less experienced drinkers.

22 The relationship between alcohol consumption and health outcomes has, in some studies,  
23 been described as a J-shaped curve where low to moderate consumption is associated with  
24 better health outcomes than non-drinking.<sup>73</sup> In their study of manufacturing company  
25 employees in the USA, Moore *et al.*<sup>66</sup> found a J-shaped relationship between alcohol

1  
2  
3 1 consumption and percentage of time at work spent "goofing off". In this study, abstainers  
4  
5 2 scored higher on "goof-off time" than low-moderate drinkers, but lower than heavy drinkers.  
6  
7 3 J-shaped relationships have also been found between alcohol consumption and cognitive  
8  
9 4 outcomes.<sup>74</sup> It is, however, somewhat unclear whether low-moderate levels of alcohol  
10  
11 5 consumption in fact have some protective effects or whether such findings are products of  
12  
13 6 confounding.<sup>4, 73, 75</sup> For instance, studies have demonstrated that heavy drinking is associated  
14  
15 7 with cognitive deficits that endure long after abstinence.<sup>76</sup> Such deficits, due to former heavy  
16  
17 8 drinking, may impair work performance, even though the employee is currently categorised as  
18  
19 9 an abstainer. A recent review found no mortality benefits for low-volume drinking compared  
20  
21 10 to lifetime abstention or occasional drinking, when adjusting for study design and  
22  
23 11 characteristics.<sup>77</sup> Nevertheless, potential curvilinear relationships between alcohol  
24  
25 12 consumption and health outcomes may contribute to explain why a considerable proportion of  
26  
27 13 associations failed to demonstrate significant positive relationships. Moreover, on-the-job  
28  
29 14 performance outcomes may be more directly affected by on-the-job drinking (within two  
30  
31 15 hours before work, during breaks or while performing the job) than by off-the-job drinking,  
32  
33 16 even though off-the-job consumption may translate into workplace impairment.<sup>5</sup> Among the  
34  
35 17 studies included in this review, only one (Ames *et al.*<sup>21</sup>) contained explicit measures of on-  
36  
37 18 the-job drinking, while the remaining studies measured overall consumption (consumption  
38  
39 19 regardless of context). Moreover, overall consumption may have differential impact on  
40  
41 20 different domains. In a study of employees in Norway, Aas *et al.*<sup>40</sup> found that overall  
42  
43 21 consumption demonstrated stronger associations with performance impairments outside the  
44  
45 22 workplace compared to work performance, which may be due to employees moderating (self-  
46  
47 23 regulating) their behaviour at work as a result of potential sanctions from employers. Self-  
48  
49 24 regulatory motivations and mechanisms may contribute to hide alcohol-related presenteeism,  
50  
51  
52  
53  
54  
55  
56  
57  
58  
59  
60

1  
2  
3 1 which may complicate the exploration of associations between alcohol consumption and work  
4  
5 2 performance.  
6  
7  
8 3

#### 4 **Implications**

5 Overall, this review provides support for the notion of alcohol-related presenteeism,  
6 i.e., that employee alcohol consumption may be associated with performance decrements at  
7 work. Research has, although often demonstrating somewhat mixed results, shown that  
8 employees' alcohol consumption is related to occupational outcomes, including absenteeism  
9 and occupational injuries.<sup>25, 34-36</sup> The results of this review on alcohol-related presenteeism  
10 imply that impaired work performance may be an additional detrimental occupational  
11 outcome related to alcohol consumption. As such, this review provides further support for  
12 targeting alcohol consumption within workplace interventions aimed at improving employee  
13 health and productivity, rather than implying that interventions should specifically target  
14 presenteeism behaviour. Further research is necessary for determining whether and how  
15 presenteeism should be targeted directly in interventions.

16 It is not possible to draw firm conclusions regarding the relationship between alcohol  
17 consumption and work performance. The majority of identified evidence was of low quality  
18 as a result of low power (small sample sizes) and/or risk of confounding. Moreover, the  
19 majority of identified studies were cross-sectional, and thereby unable to draw causal  
20 inferences about the relationship between exposure and outcome. Above all, this review  
21 implies the need for further research. First, future research would benefit from studying  
22 alcohol-related presenteeism by means of more robust study designs that better enable  
23 exploration of causal mechanisms and development over time. A more thorough exploration  
24 of alcohol as a risk factor for impaired work performance could be done by means of  
25 retrospective case-control studies, where historical data sources containing information on

1  
2  
3 1 alcohol consumption (such as medical records) are utilised in order to compare work impaired  
4  
5 2 (cases) with non-impaired employees (controls). How the relationship between alcohol and  
6  
7 3 work performance develops over time can be explored with prospective cohort studies, where  
8  
9 4 researchers can follow and compare risky and non-risky drinkers with repeated measurements  
10  
11 5 of work performance.  
12  
13

14 6 Second, both alcohol consumption and work performance are conceptualised and  
15  
16 7 measured very differently across current studies. Such heterogeneity makes it difficult to  
17  
18 8 explore findings in the literature by means of meta-analyses. Progress in the field seems to  
19  
20 9 hinge on researchers' ability to reach more agreement on how to conceptualise these variables  
21  
22 10 and measure them utilising instruments with satisfactory psychometric properties. This seems  
23  
24 11 particularly true for the concept of presenteeism. According to an expert panel from the  
25  
26 12 American College of Occupational and Environmental Medicine,<sup>31(p351)</sup> productivity  
27  
28 13 instruments should be supported by scientific evidence, be applicable to the specific work  
29  
30 14 setting, support decision making, and be practical. Ospina *et al.*<sup>78</sup> concluded that the  
31  
32 15 following three instruments were most strongly supported by evidence: The Stanford  
33  
34 16 Presenteeism Scale (6-item version),<sup>79</sup> the Endicott Work Productivity Scale (EWPS),<sup>80</sup> and  
35  
36 17 the Health and Work Questionnaire (HWQ).<sup>81</sup> Regardless of design, future research would  
37  
38 18 benefit from measurement triangulation. For instance, alcohol consumption could be  
39  
40 19 measured with a validated self-report composite measure (e.g., the AUDIT measuring both  
41  
42 20 consumption and alcohol-related harm, or the abbreviated AUDIT-C measuring only  
43  
44 21 consumption),<sup>10, 13</sup> items separating off-the-job and on-the-job drinking and hangovers, and an  
45  
46 22 alcohol biomarker test (such as the carbohydrate-deficient transferrin (CDT) test). Work  
47  
48 23 performance could be measured with a validated self-report composite instrument (e.g., the  
49  
50 24 Stanford Presenteeism Scale),<sup>79</sup> as well as with supervisors' ratings of employee work  
51  
52 25 performance and, where possible, register data on task performance. Measurement  
53  
54  
55  
56  
57  
58  
59  
60

1  
2  
3 1 triangulation may provide more valid measures as well as enabling exploration of a potential  
4  
5 2 correspondence between consumption contexts, impairment contexts and performance  
6  
7  
8 3 outcomes.

9  
10 4 Third, future research would benefit from taking possible mediators and moderators of  
11  
12 5 the relationship between alcohol and work performance into account, such as  
13  
14 6 sociodemographic, general health, work-related, and other lifestyle factors.  
15  
16  
17 7

### 18 19 8 **Methodological considerations**

20  
21 9 This review has some limitations. First and foremost, due to the heterogeneous nature  
22  
23  
24 10 of the identified data, we were unable to perform meta-analyses on the included data.  
25

26 11 Second, it may be considered a limitation that this review utilised associations and not  
27  
28 12 studies as the unit of interest. Associations were deemed the appropriate unit of interest in this  
29  
30 13 review for two reasons: (i) included studies were characterised by exploring broader aims  
31  
32 14 related to health and productivity, while this review specifically aimed at exploring the  
33  
34 15 relationship between alcohol consumption and work performance, and (ii) in several studies,  
35  
36 16 multiple associations between alcohol consumption and work performance were tested (often  
37  
38 17 with different measures and subgroups within each study).  
39

40  
41  
42 18 Third, this review did not utilise a previously validated critical appraisal tool (CAT) for  
43  
44 19 assessment of included primary research. One reason for this is that studies based on different  
45  
46 20 study designs were included in the review. At present, there exists no generic gold standard  
47  
48 21 CAT for application across study designs.<sup>82, 83</sup> A second reason is that the current review  
49  
50 22 emphasised associations rather than studies as the unit of interest. Hence, it was deemed more  
51  
52 23 appropriate to develop a parsimonious and conservative quality assessment system in which  
53  
54 24 each association was evaluated based on power (sample size) and risk of confounding (level  
55  
56 25 of adjustment). Deliberately, we chose a conservative approach to quality assessment by  
57  
58  
59  
60

1 ascribing each association an overall score in accordance with the "worst score counts"  
2 algorithm. Such an approach is in line with the COSMIN guidelines.<sup>44</sup>

3 Fourth, articles published before 1990 were not eligible for inclusion in this review. This  
4 exclusion criterion was set a priori as a result of old studies having limited external validity  
5 due to changes in drinking behaviour over time. Time restrictions were imposed at the study  
6 selection phase, not in the literature search phase of the review. This decision was made in  
7 order to be able to assess the magnitude of potentially relevant research published prior to  
8 1990. Seventeen articles from the 1980s were excluded in the title/abstract screening.  
9 However, these articles did not satisfy all the other inclusion criteria and were, thus, not  
10 exclusively excluded based on year of publication. Hence, we do not find it very likely that  
11 relevant studies published before 1990 have been missed.

12 Fifth, we chose to utilise the concept of presenteeism in line with researchers who define it  
13 in terms of decreased on-the-job productivity due to health problems.<sup>30</sup> Such an understanding  
14 does ascribe valence to the phenomenon, i.e., a behaviour contributing to lost productivity  
15 that may carry negative influence on the overall work environment.<sup>84</sup> We are, however, aware  
16 of differing opinions among scholars regarding conceptualisations of presenteeism. Different  
17 definitions have different strengths and weaknesses. According to Johns,<sup>26</sup> a proper definition  
18 should (i) neither ascribe motives nor consequences to presenteeism, and (ii) avoid conflating  
19 cause and effect by perceiving productivity loss itself as presenteeism. To some extent, we do  
20 agree with such objections against a productivity-based definition. A more open  
21 understanding, such as simply "showing up for work even when one is ill",<sup>26(p519)</sup> does not  
22 ascribe a certain valence to the phenomenon, nor does it presuppose or exclude any particular  
23 consequence. We believe, however, that in a socioeconomic and organisational perspective,  
24 situations in which employees attend work while ill become of interest primarily when  
25 performance decrements are in fact involved. In order to avoid conflating cause and effect, we



1 operationalised alcohol-related presenteeism as the product of a relationship between two  
2 measurable variables, i.e., alcohol consumption (predictor/exposure) and work performance  
3 (outcome).

## CONCLUSIONS

4  
5 Alcohol-related presenteeism (impaired work performance associated with alcohol  
6 consumption) stands out as an important but under-researched topic in the research literature.  
7 According to this review, evidence provides support for the notion that employee alcohol  
8 consumption may be associated with impaired work performance. However, due to low  
9 research quality and lack of longitudinal designs, existing evidence should still be  
10 characterised as inconclusive regarding the prevalence, nature and impact of alcohol-related  
11 presenteeism in the workforce. More robust and less heterogeneous research is warranted.

## DECLARATIONS

### Contributors

12  
13  
14  
15  
16 RWA is the principal investigator and project manager of the WIRUS project. This  
17 review study was designed by MMT and RWA. MMT analysed the data and drafted the  
18 manuscript. Data selection was performed by MMT, NH and RWA; data extraction by MMT  
19 and TB; and quality assessment by MMT and IK. TB, NH, IK WVM and RWA provided  
20 scientific input to the different drafts and provided data interpretation. All authors made  
21 critical revisions and provided intellectual content to the manuscript, approved the final  
22 version to be published, and agreed to be accountable for all aspects of this work.

### Funding



1  
2  
3 1 The review study is funded by the Norwegian Directorate of Health and the Research  
4  
5 2 Council of Norway. The funding bodies had no role in the design of the review or in data  
6  
7 3 analysis or interpretation.  
8  
9  
10 4

### 11 5 **Competing interests**

12  
13  
14 6 For the avoidance of doubt, WvM wishes to declare that he is director-shareholder of  
15  
16 7 VUmc spin-off company Evalua Nederland B.V. and non-executive board member of Arbo  
17  
18 8 Unie B.V.. Both companies operate in the Dutch occupational health care market.  
19  
20  
21 9

### 22 10 **Availability of data and materials**

23  
24  
25  
26 11 Data from the review study are available from the project owner (University of  
27  
28 12 Stavanger, Faculty of Health Sciences, Department of Public Health, Research group Societal  
29  
30 13 Participation in School and Work) by principal investigator and project manager Randi Wågø  
31  
32 14 Aas on reasonable request.  
33  
34  
35  
36  
37  
38  
39

## 40 16 **SUPPLEMENTARY FILES**

41 17 **Supplementary File 1:** Primary database search strategy (based on search in Medline) (PDF)

42 18 **Supplementary File 2:** Characteristics of tested associations in included studies (PDF)

43 19 **Supplementary File 3:** Results of quality assessment of included associations (PDF)  
44  
45  
46  
47 20  
48  
49 21  
50  
51 22  
52  
53 23  
54  
55 24  
56  
57 25  
58  
59  
60

## REFERENCES

1. Lim SS, Vos T, Flaxman AD, *et al.* A comparative risk assessment of burden of disease and injury attributable to 67 risk factors and risk factor clusters in 21 regions, 1990–2010: a systematic analysis for the Global Burden of Disease Study 2010. *Lancet* 2012;**380**:2224-60.doi:10.1016/S0140-6736(12)61766-8
2. Wood AM, Kaptoge S, Butterworth AS, *et al.* Risk thresholds for alcohol consumption: combined analysis of individual-participant data for 599 912 current drinkers in 83 prospective studies. *Lancet* 2018;**391**:1513-23.doi:10.1016/S0140-6736(18)30134-X
3. World Health Organization. Global status report on alcohol and health 2018. Geneva, Switzerland: World Health Organization 2018.
4. Griswold MG, Fullman N, Hawley C, *et al.* Alcohol use and burden for 195 countries and territories, 1990–2016: a systematic analysis for the Global Burden of Disease Study 2016. *Lancet* 2018;**392**:1015-35.doi:10.1016/S0140-6736(18)31310-2
5. Frone MR. Alcohol and illicit drug use in the workforce and workplace. Washington, DC: American Psychological Association 2013.
6. Howland J, Mangione T, Kuhlthau K, *et al.* Work-site variation in managerial drinking. *Addiction* 1996;**91**:1007-17.doi:10.1046/j.1360-0443.1996.91710077.x
7. Kawakami N, Haratani T, Hemmi T, *et al.* Prevalence and demographic correlates of alcohol-related problems in Japanese employees. *Soc Psych Psych Epid* 1992;**27**:198-202.doi:10.1007/bf00789006
8. Marchand A, Parent-Lamarche A, Blanc ME. Work and High-Risk Alcohol Consumption in the Canadian Workforce. *Int J Env Res Pub He* 2011;**8**:2692-705.doi:10.3390/ijerph8072692
9. Thørrisen MM, Skogen JC, Aas RW. The associations between employees' risky drinking and sociodemographics, and implications for intervention needs. *BMC Public Health* 2018;**18**.doi:10.1186/s12889-018-5660-x
10. Babor TF, Higgins-Biddle JC, Saunders JB, *et al.* AUDIT: The Alcohol Use Disorders Identification Test. Guidelines for use in primary health care. Geneva, Switzerland: World Health Organization 2001.
11. Taylor SE. Health psychology. 7th ed. New York, NY: McGraw-Hill 2009.
12. Dawson DA. Defining risk drinking. *Alcohol Res Curr-Rev* 2011;**34**:144-56.
13. Saunders JB, Aasland OG, Babor TF, *et al.* Development of the Alcohol Use Disorders Identification Test (AUDIT): WHO collaborative project on early detection of persons with harmful alcohol consumption-II. *Addiction* 1993;**88**:791-804.doi:10.1111/j.1360-0443.1993.tb02093.x
14. Glencross DJ. Alcohol and human performance. *Drug Alcohol Rev* 1990;**9**:111-8.doi:10.1080/09595239000185161

15. Martin CS. Measuring acute alcohol impairment. In: Karch SB, editor. Drug abuse handbook. 2nd ed. New York, NY: CRC Press 2007. p. 316-33.
16. Price DL, Liddle RJ. The effect of alcohol on a manual arc welding task. *Weld J* 1982;**61**:15-9.
17. Streufert S, Pogash R, Roache J, *et al.* Alcohol and managerial performance. *J Stud Alcohol* 1994;**55**:230-8.
18. Blood Alcohol Content calculator [cited 2019 March 8]. Available from: [https://www.drinkdriving.org/drink\\_driving\\_information\\_bloodalcoholcontentcalculator.php](https://www.drinkdriving.org/drink_driving_information_bloodalcoholcontentcalculator.php).
19. Prat G, Adan A, Pérez-Pàmies M, *et al.* Neurocognitive effects of alcohol hangover. *Addict Behav* 2008;**33**:15-23.doi:10.1016/j.addbeh.2007.05.002
20. Verster JC. The alcohol hangover: A puzzling phenomenon. *Alcohol Alcoholism* 2008;**43**:124-6.doi:10.1093/alcalc/agm163
21. Ames GM, Grube JW, Moore RS. The relationship of drinking and hangovers to workplace problems: an empirical study. *J Stud Alcohol* 1997;**58**:37-47.doi:10.15288/jsa.1997.58.37
22. Mangione TW, Howland J, Amick B, *et al.* Employee drinking practices and work performance. *J Stud Alcohol* 1999;**60**:261-70.
23. Nordaune K, Skarpaas LS, Sagvaag H, *et al.* Who initiates and organises situations for work-related alcohol use? The WIRUS culture study. *Scand J Public Health* 2017;**45**:749-56.doi:10.1177/1403494817704109
24. Frone MR. Alcohol, drugs, and workplace safety outcomes: A view from a general model of employee substance use and productivity. In: Barling J, Frone MR, editors. The psychology of workplace safety. Washington, DC: American Psychological Association 2004. p. 127-56.
25. Schou L, Moan IS. Alcohol use–sickness absence association and the moderating role of gender and socioeconomic status: A literature review. *Drug Alcohol Rev* 2016;**35**:158-69.doi:10.1111/dar.12278
26. Johns G. Presenteeism in the workplace: A review and research agenda. *J Organ Behav* 2010;**31**:519-42.doi:10.1002/job.630
27. Gosselin E, Lemyre L, Corneil W, *et al.* Presenteeism and Absenteeism: Differentiated Understanding of Related Phenomena. *J Occup Health Psych* 2013;**18**:75-86.doi:10.1037/a0030932
28. Aronsson G, Gustafsson K, Dallner M. Sick but yet at work. An empirical study of sickness presenteeism. *J Epidemiol Commun H* 2000;**54**:502-9.

- 1  
2  
3 1 29. Lau B, Dye AH, Aarseth S. Lederes erfaringer med oppfølging av sykmeldte [Managers'  
4 2 experiences with follow-up of employees on sick leave]. *Tidsskrift for Norsk*  
5 3 *psykologforening* 2018;**56**:586-97.  
6 4  
7 5 30. Schultz A, Edington D. Employee Health and Presenteeism: A Systematic Review. *J*  
8 6 *Occup Rehabil* 2007;**17**:547-79.doi:10.1007/s10926-007-9096-x  
9 7  
10 8 31. Loeppke R, Hymel PA, Lofland JH, *et al.* Health-related workplace productivity  
11 9 measurement: General and migraine-specific recommendations from the ACOEM expert  
12 10 panel. *J Occup Environ Med* 2003;**45**:349-59.doi:10.1097/01.jom.0000063619.37065.e2  
13 11  
14 12 32. Chapman LS. Presenteeism and its role in worksite health promotion. *Am J Health*  
15 13 *Promot* 2005;**19**:1-8.  
16 14  
17 15 33. Buvik K, Moan IS, Halkjelsvik T. Alcohol-related absence and presenteeism: Beyond  
18 16 productivity loss. *Int J Drug Policy* 2018;**58**:71-7.doi:10.1016/j.drugpo.2018.05.005  
19 17  
20 18 34. Jurek T, Rorat M. Fatal accidents at work in agriculture associated with alcohol  
21 19 intoxication in Lower Silesia in Poland. *Medycyna Pracy* 2017;**68**:23-  
22 20 30.doi:10.13075/mp.5893.00430  
23 21  
24 22 35. Smith GS, Kraus JF. Alcohol and residential, recreational, and occupational injuries: A  
25 23 review of the epidemiologic evidence. *Annu Rev Publ Health* 1988;**9**:99-  
26 24 121.doi:10.1146/annurev.pu.09.050188.000531  
27 25  
28 26 36. Zwerling C. Current practice and experience in drug and alcohol testing. *B Narcotics*  
29 27 1993;**45**:155-96.  
30 28  
31 29 37. Skagen K, Collins AM. The consequences of sickness presenteeism on health and  
32 30 wellbeing over time: A systematic review. *Soc Sci Med* 2016;**161**:169-  
33 31 77.doi:10.1016/j.socscimed.2016.06.005  
34 32  
35 33 38. Hemp P. Presenteeism: At Work - But Out of It. *Harvard Bus Rev* 2004;**82**:49-58.  
36 34  
37 35 39. Ford MT, Cerasoli CP, Higgins JA, *et al.* Relationships between psychological, physical,  
38 36 and behavioural health and work performance: A review and meta-analysis. *Work Stress*  
39 37 2011;**25**:185-204.doi:10.1080/02678373.2011.609035  
40 38  
41 39 40. Aas RW, Haveraaen L, Sagvaag H, *et al.* The influence of alcohol consumption on  
42 40 sickness presenteeism and impaired daily activities. The WIRUS screening study. *PLoS ONE*  
43 41 2017;**12**:e0186503.doi:10.1371/journal.pone.0186503  
44 42  
45 43 41. Allamani A, Beccaria F, Voller F. The puzzle of Italian drinking. Trends in alcohol  
46 44 consumption, harms and policy: Italy 1990-2010. *Nord Stud Alcohol Dr* 2010;**27**:465-  
47 45 78.doi:10.1177/145507251002700504  
48 46  
49 47 42. Mäkelä P, Tigerstedt C, Mustonen H. The Finnish drinking culture: Change and  
50 48 continuity in the past 40 years. *Drug Alcohol Rev* 2012;**31**:831-40.doi:10.1111/j.1465-  
51 49 3362.2012.00479.x  
52 50  
53 51  
54 52  
55 53  
56 54  
57 55  
58 56  
59 57  
60 58

- 1  
2  
3 1 43. Kaplan RM, Chambers DA, Glasgow RE. Big data and large sample sizes: A cautionary  
4 2 note on potential for bias. *Clin Transl Sci* 2014;**7**:342-6.doi:10.1111/cts.12178  
5 3  
6 4 44. Terwee C, Mokkink L, Knol D, *et al.* Rating the methodological quality in systematic  
7 5 reviews of studies on measurement properties: A scoring system for the COSMIN checklist.  
8 6 *Qual Life Res* 2012;**21**:651-7.doi:10.1007/s11136-011-9960-1  
9 7  
10 8 45. Adler DA, Possemato K, Mavandadi S, *et al.* Psychiatric status and work performance of  
11 9 veterans of Operations Enduring Freedom and Iraqi Freedom. *Psychiat Serv* 2011;**62**:39-  
12 10 46.doi:10.1176/appi.ps.62.1.39  
13 11  
14 12 46. Airila A, Hakanen J, Punakallio A, *et al.* Is work engagement related to work ability  
15 13 beyond working conditions and lifestyle factors? *Int Arch Occ Env Hea* 2012;**85**:915-  
16 14 25.doi:10.1007/s00420-012-0732-1  
17 15  
18 16 47. Fisher CA, Hoffman KJ, Austin-Lane J, *et al.* The relationship between heavy alcohol use  
19 17 and work productivity loss in active duty military personnel: A secondary analysis of the 1995  
20 18 Department of Defense Worldwide Survey. *Mil Med* 2000;**165**:355-  
21 19 61.doi:10.1093/milmed/165.5.355  
22 20  
23 21 48. Karlsson N, Skargren E, Kristenson M. Emotional support predicts more sickness absence  
24 22 and poorer self assessed work ability: A two-year prospective cohort study. *BMC Public*  
25 23 *Health* 2010;**10**:648.doi:10.1186/1471-2458-10-648  
26 24  
27 25 49. Kessler RC, Frank RG. The impact of psychiatric disorders on work loss days. *Psychol*  
28 26 *Med* 1997;**27**:861-73.doi:10.1017/s0033291797004807  
29 27  
30 28 50. Kim CH, Vincent A, Clauw DJ, *et al.* Association between alcohol consumption and  
31 29 symptom severity and quality of life in patients with fibromyalgia. *Arthritis Research and*  
32 30 *Therapy* 2013;**15**:R42.doi:10.1186/ar4200  
33 31  
34 32 51. Kirkham HS, Clark BL, Bolas CA, *et al.* Which modifiable health risks are associated  
35 33 with changes in productivity costs? *Popul Health Manag* 2015;**18**:30-  
36 34 8.doi:10.1089/pop.2014.0033  
37 35  
38 36 52. Odlaug B, Gual A, DeCourcy J, *et al.* Alcohol dependence, co-occurring conditions and  
39 37 attributable burden. *Alcohol Alcoholism* 2016;**51**:201-9.doi:10.1093/alcalc/aggv088  
40 38  
41 39 53. Pensola T, Haukka E, Kaila-Kangas L, *et al.* Good work ability despite multisite  
42 40 musculoskeletal pain? A study among occupationally active Finns. *Scand J Public Health*  
43 41 2016;**44**:300-10.doi:10.1177/1403494815617087  
44 42  
45 43 54. Richmond MK, Pampel FC, Wood RC, *et al.* Impact of employee assistance services on  
46 44 depression, anxiety, and risky alcohol use a quasi-experimental study. *J Occup Environ Med*  
47 45 2016;**58**:641-50.doi:10.1097/jom.0000000000000744  
48 46  
49 47 55. Schou L, Moan IS, Storvoll E. Attitudes toward alcohol-related sickness absence and  
50 48 presenteeism: differences across subgroups of the population? *J Subst Use* 2017;**22**:225-  
51 49 31.doi:10.1037/t61699-000  
52 50  
53  
54  
55  
56  
57  
58  
59  
60



- 1  
2  
3 1 56. Steegmann AT, Li TL, Hewner SJ, *et al.* The China productivity project: Results and  
4 2 conclusions. *Am J Phys Anthropol* 1997;**103**:295-313.doi:10.1002/(sici)1096-  
5 3 8644(199707)103:3<295::aid-ajpa1>3.0.co;2-q  
6 4  
7 4  
8 5 57. Tsuchiya M, Kawakami N, Ono Y, *et al.* Impact of mental disorders on work performance  
9 6 in a community sample of workers in Japan: The World Mental Health Japan Survey 2002-  
10 7 2005. *Psychiat Res* 2012;**198**:140-5.doi:10.1016/j.psychres.2011.10.014  
11 8  
12 9 58. van Scheppingen AR, de Vroome EM, ten Have KC, *et al.* Motivations for health and  
13 10 their associations with lifestyle, work style, health, vitality, and employee productivity. *J*  
14 11 *Occup Env Med* 2014;**56**:540-6.doi:10.1097/jom.000000000000143  
15 12  
16 12  
17 13 59. Yu J, Wang S, Yu X. Health risk factors associated with presenteeism in a Chinese  
18 14 enterprise. *Occup Med-C* 2015;**65**:732-8.doi:10.1093/occmed/kqv115  
19 15  
20 16 60. Friedman AS, Granick S, Utada A, *et al.* Drug use/abuse and supermarket workers' job  
21 17 performance. *Employee Assistance Quarterly* 1992;**7**:17-34.doi:10.1300/j022v07n04\_02  
22 18  
23 18  
24 19 61. Boles M, Pelletier B, Lynch W. The relationship between health risks and work  
25 20 productivity. *J Occup Environ Med* 2004;**46**:737-  
26 21 45.doi:10.1097/01.jom.0000131830.45744.97  
27 22  
28 23 62. Blum TC, Roman PM, Martin JK. Alcohol consumption and work performance. *J Stud*  
29 24 *Alcohol* 1993;**54**:61-70.doi:10.15288/jsa.1993.54.61  
30 25  
31 25  
32 26 63. Burton NW, Chen CY, Conti DJ, *et al.* The association of health risks with on-the-job  
33 27 productivity. *J Occup Environ Med* 2005;**47**:769-  
34 28 77.doi:10.1097/01.jom.0000169088.03301.e4  
35 29  
36 30 64. Lim D, Sanderson K, Andrews G. Lost productivity among full-time workers with mental  
37 31 disorders. *J Ment Health Policy* 2000;**3**:139-46.doi:10.1002/mhp.93  
38 32  
39 32  
40 33 65. Lowmaster SE, Morey LC. Predicting law enforcement officer job performance with the  
41 34 Personality Assessment Inventory. *J Pers Assess* 2012;**94**:254-  
42 35 61.doi:10.1080/00223891.2011.648295  
43 36  
44 37 66. Moore S, Grunberg L, Greenberg E. The relationships between alcohol problems and  
45 38 well-being, work attitudes, and performance: Are they monotonic? *J Subst Abuse*  
46 39 2000;**11**:183-204.doi:10.1016/s0899-3289(00)00020-1  
47 40  
48 40  
49 41 67. Furu H, Sainio M, Hyvärinen HK, *et al.* Work ability score of solvent-exposed workers.  
50 42 *Int Arch Occ Env Hea* 2018;**91**:559-69.doi:10.1007/s00420-018-1306-7  
51 43  
52 44 68. van den Berg S, Burdorf A, Robroek SJW. Associations between common diseases and  
53 45 work ability and sick leave among health care workers. *Int Arch Occ Env Hea* 2017;**90**:685-  
54 46 93.doi:10.1007/s00420-017-1231-1  
55 47  
56 47  
57 48 69. Ewing JA. Detecting alcoholism. The CAGE questionnaire. *JAMA* 1984;**252**:1905-  
58 49 7.doi:10.1001/jama.252.14.1905  
59 50  
60 50

- 1  
2  
3 1 70. Lerner D, Amick BC, Rogers WH, *et al*. The Work Limitations Questionnaire. *Med Care*  
4 2 2001;**39**:72-85.doi:10.1097/00005650-200101000-00009  
5 3  
6 4 71. Reilly MC, Zbrozek AS, Dukes EM. The validity and reproducibility of a work  
7 5 productivity and activity impairment instrument. *PharmacoEconomics* 1993;**4**:353-  
8 6 65.doi:10.2165/00019053-199304050-00006  
9 7  
10 8 72. Bacharach SB, Bamberger P, Biron M. Alcohol consumption and workplace absenteeism:  
11 9 The moderating effect of social support. *J Appl Psychol* 2010;**92**:334-  
12 10 48.doi:10.1037/a0018018  
13 11  
14 12 73. Grønbaek M. The positive and negative health effects of alcohol- and the public health  
15 13 implications. *J Intern Med* 2009;**265**:407-20.doi:10.1111/j.1365-2796.2009.02082.x  
16 14  
17 15 74. Neafsey EJ, Collins MA. Moderate alcohol consumption and cognitive risk. *Neuropsych*  
18 16 *Dis Treat* 2011;**7**:465-84.doi:10.2147/NDT.S23159  
19 17  
20 18 75. Skog OJ. Public health consequences of the J-curve hypothesis of alcohol problems.  
21 19 *Addiction* 1996;**91**:325-37.doi:10.1111/j.1360-0443.1996.tb02283.x  
22 20  
23 21 76. Stavro K, Pelletier J, Potvin S. Widespread and sustained cognitive deficits in alcoholism:  
24 22 A meta-analysis. *Addict Biol* 2013;**18**:203-13.doi:10.1111/j.1369-1600.2011.00418.x  
25 23  
26 24 77. Stockwell T, Zhao J, Panwar S, *et al*. Do "moderate" drinkers have reduced mortality  
27 25 risk? A systematic review and meta-analysis of alcohol consumption and all-cause mortality.  
28 26 *J Stud Alcohol Drugs* 2016;**77**:185-98.doi:10.15288/jsad.2016.77.185  
29 27  
30 28 78. Ospina MB, Dennett L, Wayne A, *et al*. A systematic review of measurement properties of  
31 29 instruments assessing presenteeism. *Am J Manag Care* 2015;**21**:171-85.  
32 30  
33 31 79. Koopman C, Pelletier KR, Murray JF, *et al*. Stanford Presenteeism Scale: Health status  
34 32 and employee productivity. *J Occup Environ Med* 2002;**44**:14-20.doi:10.1097/00043764-  
35 33 200201000-00004  
36 34  
37 35 80. Endicott J, Nee J. Endicott Work Productivity Scale (EWPS): A new measure to assess  
38 36 treatment effects. *Psychopharmacol Bull* 1997;**33**:13-6.  
39 37  
40 38 81. Shikhar R, Halpern MT, Rentz AM, *et al*. Development of the Health and Work  
41 39 Questionnaire (HWQ): An instrument for assessing workplace productivity in relation to  
42 40 worker health. *Work* 2004;**22**:219-29.  
43 41  
44 42 82. Crowe M, Sheppard L. A review of critical appraisal tools show they lack rigor:  
45 43 Alternative tool structure is proposed. *J Clin Epidemiol* 2011;**64**:79-  
46 44 89.doi:10.1016/j.jclinepi.2010.02.008  
47 45  
48 46 83. Sanderson S, Tatt ID, Higgins JPT. Tools for assessing quality and susceptibility to bias in  
49 47 observational studies in epidemiology: A systematic review and annotated bibliography. *Int J*  
50 48 *Epidemiol* 2007;**36**:666-76.doi:10.1093/ije/dym018  
51 49  
52 50  
53 51  
54 52  
55 53  
56 54  
57 55  
58 56  
59 57  
60 58

1  
2  
3 1 84. Lack DM. Presenteeism revisited. A comprehensive review. *AAOHN J* 2011;**59**:77-  
4 2 89.doi:10.3928/08910162-20110201-02  
5  
6 3  
7  
8 4  
9

10 5 FIGURE TITLE/LEGEND  
11  
12

13 6 *Figure 1.* PRISMA flow chart of the study selection process  
14  
15 7  
16  
17 8  
18  
19  
20  
21  
22  
23  
24  
25  
26  
27  
28  
29  
30  
31  
32  
33  
34  
35  
36  
37  
38  
39  
40  
41  
42  
43  
44  
45  
46  
47  
48  
49  
50  
51  
52  
53  
54  
55  
56  
57  
58  
59  
60

For peer review only





**Supplementary File 1.** Primary database search strategy (based on search in Medline)

|            |                            | Search#   | Query                             | Search type | Search level                                                                      |      |          |
|------------|----------------------------|-----------|-----------------------------------|-------------|-----------------------------------------------------------------------------------|------|----------|
| Population | <i>Employees</i>           | 1         | employee*                         | Text        | Abstract                                                                          |      |          |
|            |                            | 2         | employed                          | Text        | Abstract                                                                          |      |          |
|            |                            | 3         | worker*                           | Text        | Abstract                                                                          |      |          |
|            |                            | 4         | workforce                         | Text        | Abstract                                                                          |      |          |
|            |                            | 5         | work                              | MeSH        | -                                                                                 |      |          |
|            |                            | 6         | employment                        | MeSH        | -                                                                                 |      |          |
|            |                            | <b>7</b>  | <b>1 OR 2 OR 3 OR 4 OR 5 OR 6</b> |             |                                                                                   |      |          |
| Exposure   | <i>Alcohol consumption</i> | 8         | alcohol*                          | Text        | Abstract                                                                          |      |          |
|            |                            | 9         | drink*                            | Text        | Abstract                                                                          |      |          |
|            |                            | 10        | drunk*                            | Text        | Abstract                                                                          |      |          |
|            |                            | 11        | hangover                          | Text        | Abstract                                                                          |      |          |
|            |                            | 12        | "hang over"                       | Text        | Abstract                                                                          |      |          |
|            |                            | 13        | alcohol drinking                  | MeSH        | -                                                                                 |      |          |
|            |                            | 14        | binge drinking                    | MeSH        | -                                                                                 |      |          |
|            |                            | 15        | drinking behavior                 | MeSH        | -                                                                                 |      |          |
|            |                            |           |                                   | <b>16</b>   | <b>8 OR 9 OR 10 OR 11 OR 12 OR 13 OR 14 OR 15</b>                                 |      |          |
|            |                            | Outcome   | <i>Work performance</i>           | 17          | presenteeism                                                                      | Text | Abstract |
| 18         | "job productiv*"           |           |                                   | Text        | Abstract                                                                          |      |          |
| 19         | "work productiv*"          |           |                                   | Text        | Abstract                                                                          |      |          |
| 20         | "job capacity"             |           |                                   | Text        | Abstract                                                                          |      |          |
| 21         | "work capacity"            |           |                                   | Text        | Abstract                                                                          |      |          |
| 22         | "job ability"              |           |                                   | Text        | Abstract                                                                          |      |          |
| 23         | "work ability"             |           |                                   | Text        | Abstract                                                                          |      |          |
| 24         | "job impair*"              |           |                                   | Text        | Abstract                                                                          |      |          |
| 25         | "work impair*"             |           |                                   | Text        | Abstract                                                                          |      |          |
| 26         | "job performance"          |           |                                   | Text        | Abstract                                                                          |      |          |
| 27         | "work performance"         |           |                                   | Text        | Abstract                                                                          |      |          |
| 28         | presenteeism               |           |                                   | MeSH        | -                                                                                 |      |          |
| 29         | work performance           |           |                                   | MeSH        | -                                                                                 |      |          |
|            |                            |           |                                   | <b>30</b>   | <b>17 OR 18 OR 19 OR 20 OR 21 OR 22 OR 23 OR 24 OR 25 OR 26 OR 27 OR 28 OR 29</b> |      |          |
|            |                            | <b>31</b> | <b>7 AND 16 AND 30</b>            |             |                                                                                   |      |          |

*Note.* This primary database search strategy was applied in Medline. When applied in the other databases (Web of Science, PsycINFO, Cinahl, Amed, Embase and Swemed+), the strategy was adapted to each database.

**Supplementary File 2.** Overview of tested associations (n = 132) in the included studies (n = 26)

| Association ID | Study (author, year, reference)  | Effect size <sup>a</sup> | Significance                   | Sample size | Adjustment                    | Classification in review <sup>b</sup> |
|----------------|----------------------------------|--------------------------|--------------------------------|-------------|-------------------------------|---------------------------------------|
| 1              | Adler <i>et al.</i> , 2011 [45]  | $r = .11$                | $p = .01$                      | 473         | Unadjusted                    | ↑ * L                                 |
| 2              | "                                | $r = .10$                | $p = .03$                      | 473         | Unadjusted                    | ↑ * L                                 |
| 3              | "                                | $r = .14$                | $p = .002$                     | 473         | Unadjusted                    | ↑ * L                                 |
| 4              | "                                | $r = .14$                | $p = .002$                     | 473         | Unadjusted                    | ↑ * L                                 |
| 5              | "                                | $r = .16$                | $p < .001$                     | 473         | Unadjusted                    | ↑ * L                                 |
| 6              | "                                | $r = .07$                | $p = .16$                      | 473         | Unadjusted                    | ↑ ns L                                |
| 7              | "                                | $r = .08$                | $p = .08$                      | 473         | Unadjusted                    | ↑ ns L                                |
| 8              | "                                | $r = .09$                | $p = .50$                      | 473         | Unadjusted                    | ↑ ns L                                |
| 9              | "                                | $r = .07$                | $p = .11$                      | 473         | Unadjusted                    | ↑ ns L                                |
| 10             | "                                | $r = .10$                | $p = .04$                      | 473         | Unadjusted                    | ↑ * L                                 |
| 11             | Airila <i>et al.</i> , 2012 [46] | $r = -.05$               | ns                             | 403         | Unadjusted                    | ↑ ns L                                |
| 12             | "                                | $r = -.10$               | $p < .05$                      | 403         | Unadjusted                    | ↑ * L                                 |
| 13             | "                                | $r = -.05$               | ns                             | 403         | Unadjusted                    | ↑ ns L                                |
| 14             | "                                | $b = -.07$               | 95% CI: -.18, .05              | 403         | Age; work ability at baseline | ↑ ns L                                |
| 15             | "                                | $b = .01$                | 95% CI: -.07, .09              | 403         | Age; work ability at baseline | ↓ ns L                                |
| 16             | "                                | $b = -.06$               | 95% CI: -.16, .05              | 403         | Age; work ability at baseline | ↑ ns L                                |
| 17             | Fisher <i>et al.</i> , 2000 [47] | RR = 1.52                | $p < .05$ ; 95% CI: 1.36, 1.70 | Unclear     | Age                           | ↑ * L                                 |

|    |                                    |           |                                |         |                                                       |        |
|----|------------------------------------|-----------|--------------------------------|---------|-------------------------------------------------------|--------|
| 18 | "                                  | RR = 1.18 | 95% CI: 0.88, 1.60             | Unclear | Age                                                   | ↑ ns L |
| 19 | "                                  | RR = 1.76 | $p < .05$ ; 95% CI: 1.34, 2.33 | Unclear | Age                                                   | ↑ * L  |
| 20 | "                                  | RR = 1.38 | 95% CI: 0.72, 2.61             | Unclear | Age                                                   | ↑ ns L |
| 21 | "                                  | RR = 1.25 | 95% CI: 0.96, 1.62             | Unclear | Age                                                   | ↑ ns L |
| 22 | "                                  | RR = 0.58 | 95% CI: 0.26, 1.30             | Unclear | Age                                                   | ↓ ns L |
| 23 | "                                  | RR = 1.39 | 95% CI: 0.62, 3.12             | Unclear | Age                                                   | ↑ ns L |
| 24 | Karlsson <i>et al.</i> , 2010 [48] | OR = 0.91 | 95% CI: 0.33, 2.55             | 300     | Gender; age                                           | ↓ ns L |
| 25 | "                                  | OR = 2.33 | 95% CI: 0.84, 6.51             | 289     | Gender; age                                           | ↑ ns L |
| 26 | Kessler & Frank, 1997 [49]         | b = .88   | $p < .05$                      | 4091    | Unadjusted                                            | ↑ * L  |
| 27 | "                                  | b = .17   | ns                             | 4091    | Unadjusted                                            | ↑ ns L |
| 28 | Kim <i>et al.</i> , 2013 [50]      | unclear   | $p < .001$                     | 946     | Unadjusted                                            | * L    |
| 29 | "                                  | unclear   | $p = .03$                      | 946     | Age; employment; education; body mass index; drug use | * M    |
| 30 | "                                  | unclear   | $p = .10$                      | 884     | Age; employment; education; body mass index; drug use | ↓ ns M |
| 31 | "                                  | unclear   | $p = .11$                      | 577     | Age; employment; education; body mass index; drug use | ↓ ns M |
| 32 | "                                  | unclear   | $p = .98$                      | 577     | Age; employment; education; body mass index; drug use | ↓ ns M |

|    |    |                                      |               |                                  |       |                                                                           |        |
|----|----|--------------------------------------|---------------|----------------------------------|-------|---------------------------------------------------------------------------|--------|
| 1  |    |                                      |               |                                  |       |                                                                           |        |
| 2  |    |                                      |               |                                  |       |                                                                           |        |
| 3  | 33 | "                                    | unclear       | $p = .51$                        | 577   | Age; employment; education;<br>body mass index; drug use                  | ↓ ns M |
| 4  |    |                                      |               |                                  |       |                                                                           |        |
| 5  |    |                                      |               |                                  |       |                                                                           |        |
| 6  | 34 | "                                    | unclear       | $p = .97$                        | 369   | Age; employment; education;<br>body mass index; drug use                  | ↑ ns M |
| 7  |    |                                      |               |                                  |       |                                                                           |        |
| 8  |    |                                      |               |                                  |       |                                                                           |        |
| 9  | 35 | "                                    | unclear       | $p = .53$                        | 62    | Age; employment; education;<br>body mass index; drug use                  | ↑ ns M |
| 10 |    |                                      |               |                                  |       |                                                                           |        |
| 11 |    |                                      |               |                                  |       |                                                                           |        |
| 12 | 36 | Kirkham <i>et al.</i> , 2015<br>[51] | $\beta = .20$ | $p < .001$ ; 95% CI:<br>.14, .27 | 27459 | Age; gender; region of<br>residence; misc. work-related<br>factors        | ↑ * H  |
| 13 |    |                                      |               |                                  |       |                                                                           |        |
| 14 |    |                                      |               |                                  |       |                                                                           |        |
| 15 |    |                                      |               |                                  |       |                                                                           |        |
| 16 | 37 | "                                    | $\beta = .22$ | $p < .001$ ; 95% CI:<br>.13, .32 | 10639 | Age; gender; region of<br>residence; misc. work-related<br>factors        | ↑ * H  |
| 17 |    |                                      |               |                                  |       |                                                                           |        |
| 18 |    |                                      |               |                                  |       |                                                                           |        |
| 19 |    |                                      |               |                                  |       |                                                                           |        |
| 20 | 38 | "                                    | $\beta = .20$ | $p < .001$ ; 95% CI:<br>.10, .29 | 16820 | Age; gender; region of<br>residence; misc. work-related<br>factors        | ↑ * H  |
| 21 |    |                                      |               |                                  |       |                                                                           |        |
| 22 |    |                                      |               |                                  |       |                                                                           |        |
| 23 |    |                                      |               |                                  |       |                                                                           |        |
| 24 | 39 | Odlaug <i>et al.</i> , 2016<br>[52]  | unclear       | $p < .05$                        | 1373  | Unadjusted                                                                | ↑ * L  |
| 25 |    |                                      |               |                                  |       |                                                                           |        |
| 26 |    |                                      |               |                                  |       |                                                                           |        |
| 27 | 40 | Pensola <i>et al.</i> , 2016<br>[53] | PRR = 1.22    | 95% CI: 1.1, 1.4                 | 1351  | Age; gender                                                               | ↑ * M  |
| 28 |    |                                      |               |                                  |       |                                                                           |        |
| 29 |    |                                      |               |                                  |       |                                                                           |        |
| 30 | 41 | "                                    | PRR = 1.15    | 95% CI: 1.0, 1.3                 | 1351  | Age; gender; misc. work-<br>related, physical and<br>psychosocial factors | ↑ * H  |
| 31 |    |                                      |               |                                  |       |                                                                           |        |
| 32 |    |                                      |               |                                  |       |                                                                           |        |
| 33 |    |                                      |               |                                  |       |                                                                           |        |
| 34 | 42 | "                                    | PRR = 1.30    | 95% CI: 1.1, 1.6                 | 546   | Age                                                                       | ↑ * M  |
| 35 |    |                                      |               |                                  |       |                                                                           |        |
| 36 | 43 | "                                    | PRR = 1.21    | 95% CI: 1.0, 1.5                 | 546   | Age; gender; misc. work-<br>related, physical and<br>psychosocial factors | ↑ * M  |
| 37 |    |                                      |               |                                  |       |                                                                           |        |
| 38 |    |                                      |               |                                  |       |                                                                           |        |
| 39 |    |                                      |               |                                  |       |                                                                           |        |
| 40 |    |                                      |               |                                  |       |                                                                           |        |
| 41 |    |                                      |               |                                  |       |                                                                           |        |
| 42 |    |                                      |               |                                  |       |                                                                           |        |
| 43 |    |                                      |               |                                  |       |                                                                           |        |
| 44 |    |                                      |               |                                  |       |                                                                           |        |
| 45 |    |                                      |               |                                  |       |                                                                           |        |
| 46 |    |                                      |               |                                  |       |                                                                           |        |

|    |    |                                              |                        |                    |      |                                                                           |
|----|----|----------------------------------------------|------------------------|--------------------|------|---------------------------------------------------------------------------|
| 1  |    |                                              |                        |                    |      |                                                                           |
| 2  |    |                                              |                        |                    |      |                                                                           |
| 3  | 44 | "                                            | PRR = 1.15             | 95% CI: 1.0, 1.4   | 805  | Age                                                                       |
| 4  |    |                                              |                        |                    |      | ↑ * M                                                                     |
| 5  | 45 | "                                            | PRR = 1.01             | 95% CI: 0.9, 1.2   | 573  | Age; gender                                                               |
| 6  |    |                                              |                        |                    |      | ↑ ns M                                                                    |
| 7  | 46 | "                                            | PRR = 1.92             | 95% CI: 1.4, 2.7   | 778  | Age; gender                                                               |
| 8  |    |                                              |                        |                    |      | ↑ * M                                                                     |
| 9  | 47 | "                                            | PRR = 1.80             | 95% CI: 1.3, 2.6   | 778  | Age; gender; misc. work-<br>related, physical and<br>psychosocial factors |
| 10 |    |                                              |                        |                    |      | ↑ * M                                                                     |
| 11 |    |                                              |                        |                    |      |                                                                           |
| 12 |    |                                              |                        |                    |      |                                                                           |
| 13 | 48 | Richmond <i>et al.</i> , 2016<br>[54]        | b = 0.017; β =<br>.057 | ns                 | 338  | Baseline presenteeism                                                     |
| 14 |    |                                              |                        |                    |      | ↑ ns L                                                                    |
| 15 |    |                                              |                        |                    |      |                                                                           |
| 16 | 49 | Schou <i>et al.</i> , 2017 [55]              | r = .458               | p <.01             | 1406 | Unadjusted                                                                |
| 17 |    |                                              |                        |                    |      | ↑ * L                                                                     |
| 18 | 50 | Steedmann <i>et al.</i> , 1997<br>[56]       | r = .073               | ns                 | 45   | Unadjusted                                                                |
| 19 |    |                                              |                        |                    |      | ↑ ns L                                                                    |
| 20 |    |                                              |                        |                    |      |                                                                           |
| 21 | 51 | Tsuchiya <i>et al.</i> , 2012<br>[57]        | b = -1.1               | 95% CI: -2.1, -0.0 | 530  | Unadjusted                                                                |
| 22 |    |                                              |                        |                    |      | ↑ * L                                                                     |
| 23 |    |                                              |                        |                    |      |                                                                           |
| 24 | 52 | "                                            | b = -1.1               | 95% CI: -2.1, -0.1 | 530  | Gender; age; education; job<br>category; work time                        |
| 25 |    |                                              |                        |                    |      | ↑ * M                                                                     |
| 26 |    |                                              |                        |                    |      |                                                                           |
| 27 | 53 | van Scheppingen <i>et al.</i> ,<br>2014 [58] | r = .01                | ns                 | 629  | Unadjusted                                                                |
| 28 |    |                                              |                        |                    |      | ↑ ns L                                                                    |
| 29 |    |                                              |                        |                    |      |                                                                           |
| 30 | 54 | Yu <i>et al.</i> , 2015 [59]                 | χ <sup>2</sup> = 4.6   | p <.05             | 1506 | Unadjusted                                                                |
| 31 |    |                                              |                        |                    |      | ↑ * L                                                                     |
| 32 | 55 | "                                            | OR = 1.76              | 95% CI: 1.02, 3.03 | 1506 | unclear                                                                   |
| 33 |    |                                              |                        |                    |      | ↑ * L                                                                     |
| 34 | 56 | Friedman <i>et al.</i> , 1992<br>[60]        | r = -.09               | p <.01             | 860  | Unadjusted                                                                |
| 35 |    |                                              |                        |                    |      | ↑ * L                                                                     |
| 36 |    |                                              |                        |                    |      |                                                                           |
| 37 | 57 | "                                            | r = .02                | ns                 | 860  | Unadjusted                                                                |
| 38 |    |                                              |                        |                    |      | ↑ ns L                                                                    |
| 39 | 58 | "                                            | r = -.14               | p <.01             | 973  | Unadjusted                                                                |
| 40 |    |                                              |                        |                    |      | ↑ * L                                                                     |
| 41 |    |                                              |                        |                    |      |                                                                           |
| 42 |    |                                              |                        |                    |      |                                                                           |
| 43 |    |                                              |                        |                    |      |                                                                           |
| 44 |    |                                              |                        |                    |      |                                                                           |
| 45 |    |                                              |                        |                    |      |                                                                           |
| 46 |    |                                              |                        |                    |      |                                                                           |

1  
2  
3  
4  
5  
6  
7  
8  
9  
10  
11  
12  
13  
14  
15  
16  
17  
18  
19  
20  
21  
22  
23  
24  
25  
26  
27  
28  
29  
30  
31  
32  
33  
34  
35  
36  
37  
38  
39  
40  
41  
42  
43  
44  
45  
46

|    |                                 |                   |            |      |                                 |        |
|----|---------------------------------|-------------------|------------|------|---------------------------------|--------|
| 59 | "                               | $r = .09$         | $p < .01$  | 973  | Unadjusted                      | ↑ * L  |
| 60 | "                               | $r = -.12$        | $p < .01$  | 886  | Unadjusted                      | ↑ * L  |
| 61 | "                               | $r = .05$         | ns         | 886  | Unadjusted                      | ↑ ns L |
| 62 | "                               | $r = -.13$        | $p < .01$  | 852  | Unadjusted                      | ↑ * L  |
| 63 | "                               | $r = .06$         | ns         | 852  | Unadjusted                      | ↑ ns L |
| 64 | "                               | $r = .09$         | $p < .01$  | 863  | Unadjusted                      | ↑ * L  |
| 65 | "                               | $r = .03$         | ns         | 863  | Unadjusted                      | ↑ ns L |
| 66 | "                               | $r = .10$         | $p < .01$  | 1229 | Unadjusted                      | ↓ ns L |
| 67 | "                               | $r = .06$         | $p < .05$  | 1229 | Unadjusted                      | ↑ * L  |
| 68 | "                               | $r = .09$         | $p < .01$  | 1229 | Unadjusted                      | ↓ * L  |
| 69 | "                               | $r = .07$         | $p < .05$  | 1229 | Unadjusted                      | ↑ * L  |
| 70 | Boles <i>et al.</i> , 2004 [61] | unclear           | ns         | 2264 | Age; gender; misc. risk factors | ↑ ns H |
| 71 | "                               | OR = 3.74         | $p = .115$ | 2264 | Age; gender; misc. risk factors | ↑ ns H |
| 72 | "                               | b = 0.901         | $p = .930$ | 2264 | Age; gender; misc. risk factors | ↑ ns H |
| 73 | Blum <i>et al.</i> , 1993 [62]  | $r = -.016$       | ns         | 136  | Unadjusted                      | ↑ ns L |
| 74 | "                               | $M_{diff} = 0.01$ | ns         | 136  | Unadjusted                      | ↑ ns L |
| 75 | "                               | $M_{diff} = 0.21$ | ns         | 136  | Unadjusted                      | ↑ ns L |
| 76 | "                               | $M_{diff} = 0.05$ | ns         | 136  | Unadjusted                      | ↑ ns L |

|    |    |                                     |                      |           |       |                                           |        |
|----|----|-------------------------------------|----------------------|-----------|-------|-------------------------------------------|--------|
| 1  |    |                                     |                      |           |       |                                           |        |
| 2  |    |                                     |                      |           |       |                                           |        |
| 3  | 77 | "                                   | $r = -.185$          | $p < .05$ | 136   | Unadjusted                                | ↑ * L  |
| 4  |    |                                     |                      |           |       |                                           |        |
| 5  | 78 | "                                   | $M_{diff} = 0.19$    | $p < .05$ | 136   | Unadjusted                                | ↑ * L  |
| 6  |    |                                     |                      |           |       |                                           |        |
| 7  | 79 | "                                   | $M_{diff} = 0.16$    | ns        | 136   | Unadjusted                                | ↑ ns L |
| 8  |    |                                     |                      |           |       |                                           |        |
| 9  | 80 | "                                   | $M_{diff} = 0.03$    | ns        | 136   | Unadjusted                                | ↑ ns L |
| 10 |    |                                     |                      |           |       |                                           |        |
| 11 | 81 | "                                   | $r = -.233$          | $p < .01$ | 136   | Unadjusted                                | ↑ * L  |
| 12 |    |                                     |                      |           |       |                                           |        |
| 13 | 82 | "                                   | $M_{diff} = 0.28$    | $p < .01$ | 136   | Unadjusted                                | ↑ * L  |
| 14 |    |                                     |                      |           |       |                                           |        |
| 15 | 83 | "                                   | $M_{diff} = 0.35$    | $p < .01$ | 136   | Unadjusted                                | ↑ * L  |
| 16 |    |                                     |                      |           |       |                                           |        |
| 17 | 84 | "                                   | $M_{diff} = 0.03$    | $p < .05$ | 136   | Unadjusted                                | ↑ * L  |
| 18 | 85 | Burton <i>et al.</i> , 2005 [63]    | $M_{diff} = -0.0748$ | ns        | 28375 | Age; gender; diseases; misc. risk factors | ↓ ns H |
| 19 |    |                                     |                      |           |       |                                           |        |
| 20 | 86 | "                                   | $M_{diff} = -0.0447$ | ns        | 28375 | Age; gender; diseases; misc. risk factors | ↓ ns H |
| 21 |    |                                     |                      |           |       |                                           |        |
| 22 | 87 | "                                   | $M_{diff} = -0.0833$ | ns        | 28375 | Age; gender; diseases; misc. risk factors | ↓ ns H |
| 23 |    |                                     |                      |           |       |                                           |        |
| 24 | 88 | "                                   | $M_{diff} = -0.0853$ | ns        | 28375 | Age; gender; diseases; misc. risk factors | ↓ ns H |
| 25 |    |                                     |                      |           |       |                                           |        |
| 26 | 89 | "                                   | $M_{diff} = -0.0865$ | ns        | 28375 | Age; gender; diseases; misc. risk factors | ↓ ns H |
| 27 |    |                                     |                      |           |       |                                           |        |
| 28 | 90 | Lim <i>et al.</i> , 2000 [64]       | $b = -0.92$          | ns        | 4579  | Physical and mental disorders             | ↓ ns M |
| 29 |    |                                     |                      |           |       |                                           |        |
| 30 | 91 | "                                   | $b = 0.18$           | ns        | 4579  | Physical and mental disorders             | ↑ ns M |
| 31 |    |                                     |                      |           |       |                                           |        |
| 32 | 92 | Lowmaster <i>et al.</i> , 2012 [65] | $r = .21$            | ns        | 85    | Unadjusted                                | ↓ ns L |
| 33 |    |                                     |                      |           |       |                                           |        |
| 34 | 93 | "                                   | $r = .12$            | ns        | 29    | Unadjusted                                | ↓ ns L |
| 35 |    |                                     |                      |           |       |                                           |        |
| 36 |    |                                     |                      |           |       |                                           |        |
| 37 |    |                                     |                      |           |       |                                           |        |
| 38 |    |                                     |                      |           |       |                                           |        |
| 39 |    |                                     |                      |           |       |                                           |        |
| 40 |    |                                     |                      |           |       |                                           |        |
| 41 |    |                                     |                      |           |       |                                           |        |
| 42 |    |                                     |                      |           |       |                                           |        |
| 43 |    |                                     |                      |           |       |                                           |        |
| 44 |    |                                     |                      |           |       |                                           |        |
| 45 |    |                                     |                      |           |       |                                           |        |
| 46 |    |                                     |                      |           |       |                                           |        |



|    |     |                                 |                              |           |      |                                            |        |
|----|-----|---------------------------------|------------------------------|-----------|------|--------------------------------------------|--------|
| 1  |     |                                 |                              |           |      |                                            |        |
| 2  |     |                                 |                              |           |      |                                            |        |
| 3  | 94  | "                               | $r = .23$                    | ns        | 56   | Unadjusted                                 | ↓ ns L |
| 4  |     |                                 |                              |           |      |                                            |        |
| 5  | 95  | Moore <i>et al.</i> , 2000 [66] | unclear                      | $p < .05$ | 1521 | Unadjusted                                 | ↑ * L  |
| 6  |     |                                 |                              |           |      |                                            |        |
| 7  | 96  | "                               | unclear                      | $p < .05$ | 1378 | Unadjusted                                 | ↑ * L  |
| 8  |     |                                 |                              |           |      |                                            |        |
| 9  | 97  | "                               | unclear                      | $p < .05$ | 520  | Unadjusted                                 | ↑ * L  |
| 10 |     |                                 |                              |           |      |                                            |        |
| 11 | 98  | "                               | unclear                      | $p < .05$ | 2256 | Demographic variables                      | * M    |
| 12 |     |                                 |                              |           |      |                                            |        |
| 13 | 99  | "                               | $M_{diff} = 0.1$             | $p = .65$ | 1780 | Demographic variables                      | ↓ ns M |
| 14 | 100 | "                               | $M_{diff} = 0.2$             | $p = .10$ | 520  | Demographic variables                      | ↑ ns M |
| 15 |     |                                 |                              |           |      |                                            |        |
| 16 | 101 | "                               | $M_{diff} = 0.3$             | $p < .01$ | 1378 | Demographic variables                      | ↑ * M  |
| 17 |     |                                 |                              |           |      |                                            |        |
| 18 | 102 | "                               | $M_{diff} = 0.0$             | $p = .68$ | 676  | Demographic variables                      | ns M   |
| 19 |     |                                 |                              |           |      |                                            |        |
| 20 | 103 | "                               | $M_{diff} = 0.1$             | $p = .09$ | 1534 | Demographic variables                      | ↑ ns M |
| 21 |     |                                 |                              |           |      |                                            |        |
| 22 | 104 | "                               | $M_{diff} = 0.2$             | $p = .10$ | 274  | Demographic variables                      | ↑ ns L |
| 23 |     |                                 |                              |           |      |                                            |        |
| 24 | 105 | "                               | $M_{diff} = 0.1$             | $p = .42$ | 663  | Demographic variables                      | ↑ ns M |
| 25 |     |                                 |                              |           |      |                                            |        |
| 26 | 106 | "                               | $M_{diff} = 0.2$             | $p < .05$ | 1521 | Demographic variables                      | ↑ * M  |
| 27 |     |                                 |                              |           |      |                                            |        |
| 28 | 107 | "                               | $M_{diff} = 0.1$             | $p = .22$ | 261  | Demographic variables                      | ↑ ns L |
| 29 |     |                                 |                              |           |      |                                            |        |
| 30 | 108 | Ames <i>et al.</i> , 1997 [21]  | $b = -0.02; \beta =$<br>-.02 | ns        | 832  | Drinking variables; job<br>characteristics | ↓ ns M |
| 31 |     |                                 |                              |           |      |                                            |        |
| 32 | 109 | "                               | $b = 0.08; \beta =$<br>.08   | $p < .05$ | 832  | Drinking variables; job<br>characteristics | ↑ * M  |
| 33 |     |                                 |                              |           |      |                                            |        |
| 34 | 110 | "                               | $b = 0.08; \beta =$<br>.08   | $p < .05$ | 832  | Drinking variables; job<br>characteristics | ↑ * M  |
| 35 |     |                                 |                              |           |      |                                            |        |
| 36 | 111 | "                               | $b = -0.01; \beta =$<br>-.01 | ns        | 832  | Drinking variables; job<br>characteristics | ↓ ns M |
| 37 |     |                                 |                              |           |      |                                            |        |
| 38 |     |                                 |                              |           |      |                                            |        |
| 39 |     |                                 |                              |           |      |                                            |        |
| 40 |     |                                 |                              |           |      |                                            |        |
| 41 |     |                                 |                              |           |      |                                            |        |
| 42 |     |                                 |                              |           |      |                                            |        |
| 43 |     |                                 |                              |           |      |                                            |        |
| 44 |     |                                 |                              |           |      |                                            |        |
| 45 |     |                                 |                              |           |      |                                            |        |
| 46 |     |                                 |                              |           |      |                                            |        |

|     |                                |                            |                    |      |                                                                          |        |
|-----|--------------------------------|----------------------------|--------------------|------|--------------------------------------------------------------------------|--------|
| 112 | "                              | $b = -0.03; \beta = -0.03$ | ns                 | 832  | Drinking variables; job characteristics                                  | ↓ ns M |
| 113 | "                              | $b = -0.02; \beta = -0.02$ | ns                 | 832  | Drinking variables; sociodemographics                                    | ↓ ns M |
| 114 | "                              | $b = -0.01; \beta = -0.01$ | ns                 | 832  | Drinking variables; sociodemographics                                    | ↓ ns M |
| 115 | "                              | $b = 0.21; \beta = .21$    | $p < .001$         | 832  | Drinking variables; sociodemographics                                    | ↑ * M  |
| 116 | "                              | $b = -0.01; \beta = -0.01$ | ns                 | 832  | Drinking variables; sociodemographics                                    | ↓ ns M |
| 117 | "                              | $b = 0.00; \beta = .00$    | ns                 | 832  | Drinking variables; sociodemographics                                    | ↑ ns M |
| 118 | "                              | $\eta^2 = .01$             | $p < .02$          | 832  | Unadjusted                                                               | ↑ * L  |
| 119 | "                              | $\eta^2 = .01$             | $p < .05$          | 832  | Unadjusted                                                               | ↑ * L  |
| 120 | "                              | $\eta^2 = .02$             | $p < .01$          | 832  | Unadjusted                                                               | ↑ * L  |
| 121 | "                              | $\eta^2 = .01$             | $p < .05$          | 832  | Unadjusted                                                               | ↑ * L  |
| 122 | Furu <i>et al.</i> , 2018 [67] | OR = 1.25                  | 95% CI: 0.98, 1.61 | 1622 | Unadjusted                                                               | ↑ ns L |
| 123 | "                              | OR = 1.36                  | 95% CI: 1.05, 1.77 | 1622 | Age                                                                      | ↑ * M  |
| 124 | Aas <i>et al.</i> , 2017 [40]  | $r = .049$                 | $p < .01$          | 3278 | Unadjusted                                                               | ↑ * L  |
| 125 | "                              | $r = .076$                 | $p < .001$         | 3278 | Unadjusted                                                               | ↑ * L  |
| 126 | "                              | $b = 0.016; \beta = .028$  | ns                 | 3278 | Gender; age; education; living status; employment sector; binge drinking | ↑ ns H |

1  
2  
3  
4  
5  
6  
7  
8  
9  
10  
11  
12  
13  
14  
15  
16  
17  
18  
19  
20  
21  
22  
23  
24  
25  
26  
27  
28  
29  
30  
31  
32  
33  
34  
35  
36  
37  
38  
39  
40  
41  
42  
43  
44  
45  
46

|     |                                        |                           |                    |      |                                                                              |        |
|-----|----------------------------------------|---------------------------|--------------------|------|------------------------------------------------------------------------------|--------|
| 127 | "                                      | b = 0.040; $\beta$ = .057 | $p < .01$          | 3278 | Gender; age; education; living status; employment sector; drinking frequency | ↑ * H  |
| 128 | van den Berg <i>et al.</i> , 2017 [68] | OR = 1.23                 | 95% CI: 0.87, 1.74 | 509  | Gender; age; education                                                       | ↑ ns M |
| 129 | "                                      | OR = 1.28                 | 95% CI: 0.99, 1.65 | 1267 | Gender; age; education                                                       | ↑ ns M |
| 130 | "                                      | OR = 1.00                 | ns                 | 410  | Gender; age; education                                                       | ns L   |
| 131 | "                                      | OR = 1.18                 | 95% CI: 0.66, 3.11 | 413  | Gender; age; education                                                       | ↑ ns L |
| 132 | "                                      | OR = 1.52                 | 95% CI: 0.96, 2.41 | 335  | Gender; age; education                                                       | ↑ ns L |

<sup>a</sup>  $r$  = correlation coefficient;  $b$  = unstandardised regression coefficient; RR = relative risk; OR = odds ratio;  $\beta$  = standardised regression coefficient; PRR = prevalence risk ratio;  $\chi^2$  = chi square;  $M_{diff}$  = mean difference;  $\eta^2$  = eta squared

<sup>b</sup> ↑ = positive association; ↓ = negative association; | = inconsistent direction; \* = significant association; ns = non-significant association; L = low quality association; M = moderate quality association; H = high quality association

**Supplementary File 3.** Results of quality assessments of included associations (n = 132)

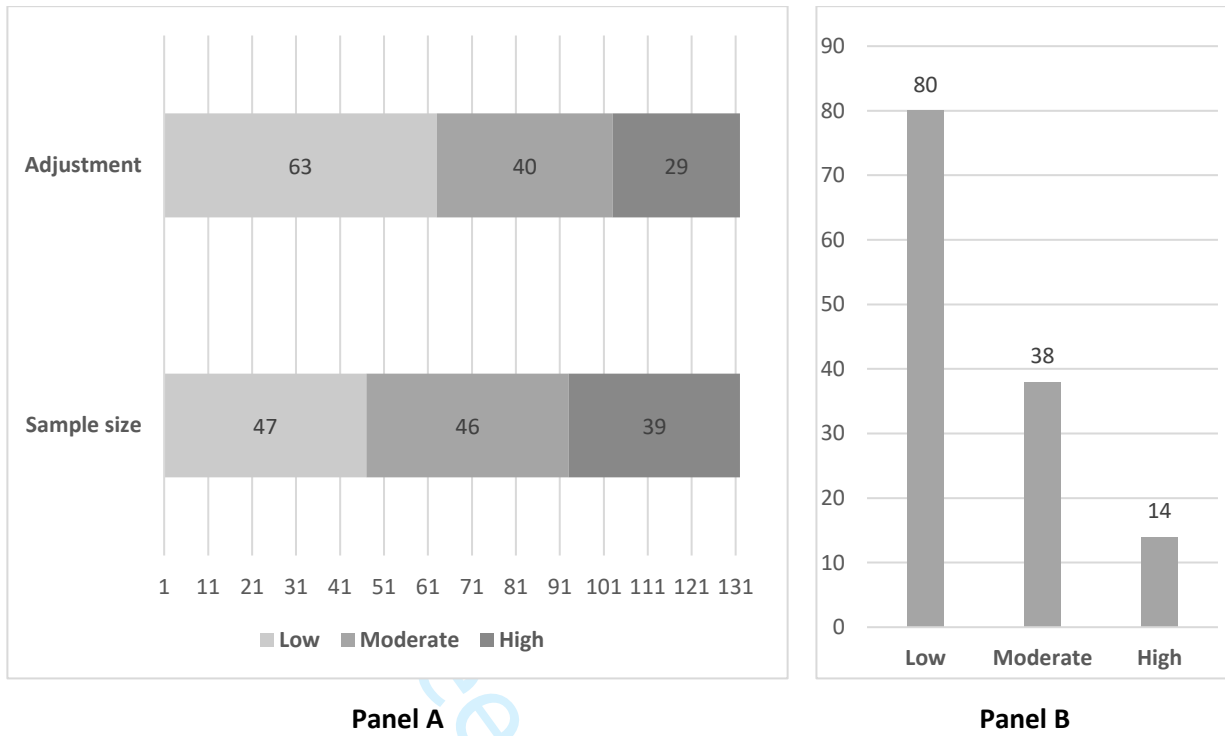

Panel A displays quality assessments separately on two key domains (sample size and level of adjustment). Panel B displays overall assessments according to the “worst score counts” algorithm.

## MOOSE Checklist for Meta-analyses of Observational Studies

| Item No                                     | Recommendation                                                                                                                                                                                                                                                               | Reported on Page No |
|---------------------------------------------|------------------------------------------------------------------------------------------------------------------------------------------------------------------------------------------------------------------------------------------------------------------------------|---------------------|
| Reporting of background should include      |                                                                                                                                                                                                                                                                              |                     |
| 1                                           | Problem definition                                                                                                                                                                                                                                                           | 2,9                 |
| 2                                           | Hypothesis statement                                                                                                                                                                                                                                                         | n/a                 |
| 3                                           | Description of study outcome(s)                                                                                                                                                                                                                                              | 6-8                 |
| 4                                           | Type of exposure or intervention used                                                                                                                                                                                                                                        | 4-6                 |
| 5                                           | Type of study designs used                                                                                                                                                                                                                                                   | 9                   |
| 6                                           | Study population                                                                                                                                                                                                                                                             | 5-6,9               |
| Reporting of search strategy should include |                                                                                                                                                                                                                                                                              |                     |
| 7                                           | Qualifications of searchers (eg, librarians and investigators)                                                                                                                                                                                                               | 1,10-11             |
| 8                                           | Search strategy, including time period included in the synthesis and key words                                                                                                                                                                                               | 10-11, SF1          |
| 9                                           | Effort to include all available studies, including contact with authors                                                                                                                                                                                                      | 11                  |
| 10                                          | Databases and registries searched                                                                                                                                                                                                                                            | 10, SF1             |
| 11                                          | Search software used, name and version, including special features used (eg, explosion)                                                                                                                                                                                      | 11                  |
| 12                                          | Use of hand searching (eg, reference lists of obtained articles)                                                                                                                                                                                                             | 11                  |
| 13                                          | List of citations located and those excluded, including justification                                                                                                                                                                                                        | n/a                 |
| 14                                          | Method of addressing articles published in languages other than English                                                                                                                                                                                                      | 9-10                |
| 15                                          | Method of handling abstracts and unpublished studies                                                                                                                                                                                                                         | 9-10                |
| 16                                          | Description of any contact with authors                                                                                                                                                                                                                                      | n/a                 |
| Reporting of methods should include         |                                                                                                                                                                                                                                                                              |                     |
| 17                                          | Description of relevance or appropriateness of studies assembled for assessing the hypothesis to be tested                                                                                                                                                                   | 9-10,11             |
| 18                                          | Rationale for the selection and coding of data (eg, sound clinical principles or convenience)                                                                                                                                                                                | 11-12               |
| 19                                          | Documentation of how data were classified and coded (eg, multiple raters, blinding and interrater reliability)                                                                                                                                                               | 11-12               |
| 20                                          | Assessment of confounding (eg, comparability of cases and controls in studies where appropriate)                                                                                                                                                                             | 12-13               |
| 21                                          | Assessment of study quality, including blinding of quality assessors, stratification or regression on possible predictors of study results                                                                                                                                   | 12-13               |
| 22                                          | Assessment of heterogeneity                                                                                                                                                                                                                                                  | 12                  |
| 23                                          | Description of statistical methods (eg, complete description of fixed or random effects models, justification of whether the chosen models account for predictors of study results, dose-response models, or cumulative meta-analysis) in sufficient detail to be replicated | 13-14               |
| 24                                          | Provision of appropriate tables and graphics                                                                                                                                                                                                                                 | Fig1, SF1           |
| Reporting of results should include         |                                                                                                                                                                                                                                                                              |                     |
| 25                                          | Graphic summarizing individual study estimates and overall estimate                                                                                                                                                                                                          | n/a                 |
| 26                                          | Table giving descriptive information for each study included                                                                                                                                                                                                                 | Table1              |
| 27                                          | Results of sensitivity testing (eg, subgroup analysis)                                                                                                                                                                                                                       | n/a                 |
| 28                                          | Indication of statistical uncertainty of findings                                                                                                                                                                                                                            | SF2                 |

| Item No                                 | Recommendation                                                                                                            | Reported on Page No |
|-----------------------------------------|---------------------------------------------------------------------------------------------------------------------------|---------------------|
| Reporting of discussion should include  |                                                                                                                           |                     |
| 29                                      | Quantitative assessment of bias (eg, publication bias)                                                                    | 22, SF3             |
| 30                                      | Justification for exclusion (eg, exclusion of non-English language citations)                                             | 37                  |
| 31                                      | Assessment of quality of included studies                                                                                 | 36                  |
| Reporting of conclusions should include |                                                                                                                           |                     |
| 32                                      | Consideration of alternative explanations for observed results                                                            | 32-34               |
| 33                                      | Generalization of the conclusions (ie, appropriate for the data presented and within the domain of the literature review) | 34                  |
| 34                                      | Guidelines for future research                                                                                            | 34-35               |
| 35                                      | Disclosure of funding source                                                                                              | 38-39               |

From: Stroup DF, Berlin JA, Morton SC, et al, for the Meta-analysis Of Observational Studies in Epidemiology (MOOSE) Group. Meta-analysis of Observational Studies in Epidemiology. A Proposal for Reporting. *JAMA*. 2000;283(15):2008-2012. doi: 10.1001/jama.283.15.2008.

SF1 = Supplementary File 1

SF2 = Supplementary File 2

SF3 = Supplementary File 3

Peer review only
