# Supplementary material for: Association between alcohol consumption and impaired work performance (presenteeism): a systematic review
Source: PubMed Central journal article supplement — BMJ Open. 2019 Jul 16;9(7):e029184. doi: 10.1136/bmjopen-2019-029184 (PMC6661906; doi:10.1136/bmjopen-2019-029184), 2019-07-16
Supplement: bmjopen-2019-029184supp001.pdf [file bmjopen-2019-029184supp001.pdf]

**Supplementary File 1.** Primary database search strategy (based on search in Medline)

|            |                                                   | Search#   | Query                                                                             | Search type | Search level |
|------------|---------------------------------------------------|-----------|-----------------------------------------------------------------------------------|-------------|--------------|
| Population | <i>Employees</i>                                  | 1         | employee*                                                                         | Text        | Abstract     |
|            |                                                   | 2         | employed                                                                          | Text        | Abstract     |
|            |                                                   | 3         | worker*                                                                           | Text        | Abstract     |
|            |                                                   | 4         | workforce                                                                         | Text        | Abstract     |
|            |                                                   | 5         | work                                                                              | MeSH        | -            |
|            |                                                   | 6         | employment                                                                        | MeSH        | -            |
|            |                                                   | <b>7</b>  | <b>1 OR 2 OR 3 OR 4 OR 5 OR 6</b>                                                 |             |              |
| Exposure   | <i>Alcohol consumption</i>                        | 8         | alcohol*                                                                          | Text        | Abstract     |
|            |                                                   | 9         | drink*                                                                            | Text        | Abstract     |
|            |                                                   | 10        | drunk*                                                                            | Text        | Abstract     |
|            |                                                   | 11        | hangover                                                                          | Text        | Abstract     |
|            |                                                   | 12        | "hang over"                                                                       | Text        | Abstract     |
|            |                                                   | 13        | alcohol drinking                                                                  | MeSH        | -            |
|            |                                                   | 14        | binge drinking                                                                    | MeSH        | -            |
|            |                                                   | 15        | drinking behavior                                                                 | MeSH        | -            |
| <b>16</b>  | <b>8 OR 9 OR 10 OR 11 OR 12 OR 13 OR 14 OR 15</b> |           |                                                                                   |             |              |
| Outcome    | <i>Work performance</i>                           | 17        | presenteeism                                                                      | Text        | Abstract     |
|            |                                                   | 18        | "job productiv*"                                                                  | Text        | Abstract     |
|            |                                                   | 19        | "work productiv*"                                                                 | Text        | Abstract     |
|            |                                                   | 20        | "job capacity"                                                                    | Text        | Abstract     |
|            |                                                   | 21        | "work capacity"                                                                   | Text        | Abstract     |
|            |                                                   | 22        | "job ability"                                                                     | Text        | Abstract     |
|            |                                                   | 23        | "work ability"                                                                    | Text        | Abstract     |
|            |                                                   | 24        | "job impair*"                                                                     | Text        | Abstract     |
|            |                                                   | 25        | "work impair*"                                                                    | Text        | Abstract     |
|            |                                                   | 26        | "job performance"                                                                 | Text        | Abstract     |
|            |                                                   | 27        | "work performance"                                                                | Text        | Abstract     |
|            |                                                   | 28        | presenteeism                                                                      | MeSH        | -            |
|            |                                                   | 29        | work performance                                                                  | MeSH        | -            |
|            |                                                   | <b>30</b> | <b>17 OR 18 OR 19 OR 20 OR 21 OR 22 OR 23 OR 24 OR 25 OR 26 OR 27 OR 28 OR 29</b> |             |              |
| <b>31</b>  | <b>7 AND 16 AND 30</b>                            |           |                                                                                   |             |              |

*Note.* This primary database search strategy was applied in Medline. When applied in the other databases (Web of Science, PsycINFO, Cinahl, Amed, Embase and Swemed+), the strategy was adapted to each database.
