# Supplementary material for: Association between alcohol consumption and impaired work performance (presenteeism): a systematic review
Source: PubMed Central journal article supplement — BMJ Open. 2019 Jul 16;9(7):e029184. doi: 10.1136/bmjopen-2019-029184 (PMC6661906; doi:10.1136/bmjopen-2019-029184), 2019-07-16
Supplement: bmjopen-2019-029184supp002.pdf [file bmjopen-2019-029184supp002.pdf]

**Supplementary File 2.** Overview of tested associations (n = 132) in the included studies (n = 26)

| Association ID | Study (author, year, reference)  | Effect size <sup>a</sup> | Significance                   | Sample size | Adjustment                    | Classification in review <sup>b</sup> |
|----------------|----------------------------------|--------------------------|--------------------------------|-------------|-------------------------------|---------------------------------------|
| 1              | Adler <i>et al.</i> , 2011 [45]  | $r = .11$                | $p = .01$                      | 473         | Unadjusted                    | ↑ * L                                 |
| 2              | "                                | $r = .10$                | $p = .03$                      | 473         | Unadjusted                    | ↑ * L                                 |
| 3              | "                                | $r = .14$                | $p = .002$                     | 473         | Unadjusted                    | ↑ * L                                 |
| 4              | "                                | $r = .14$                | $p = .002$                     | 473         | Unadjusted                    | ↑ * L                                 |
| 5              | "                                | $r = .16$                | $p < .001$                     | 473         | Unadjusted                    | ↑ * L                                 |
| 6              | "                                | $r = .07$                | $p = .16$                      | 473         | Unadjusted                    | ↑ ns L                                |
| 7              | "                                | $r = .08$                | $p = .08$                      | 473         | Unadjusted                    | ↑ ns L                                |
| 8              | "                                | $r = .09$                | $p = .50$                      | 473         | Unadjusted                    | ↑ ns L                                |
| 9              | "                                | $r = .07$                | $p = .11$                      | 473         | Unadjusted                    | ↑ ns L                                |
| 10             | "                                | $r = .10$                | $p = .04$                      | 473         | Unadjusted                    | ↑ * L                                 |
| 11             | Airila <i>et al.</i> , 2012 [46] | $r = -.05$               | ns                             | 403         | Unadjusted                    | ↑ ns L                                |
| 12             | "                                | $r = -.10$               | $p < .05$                      | 403         | Unadjusted                    | ↑ * L                                 |
| 13             | "                                | $r = -.05$               | ns                             | 403         | Unadjusted                    | ↑ ns L                                |
| 14             | "                                | $b = -.07$               | 95% CI: $-.18, .05$            | 403         | Age; work ability at baseline | ↑ ns L                                |
| 15             | "                                | $b = .01$                | 95% CI: $-.07, .09$            | 403         | Age; work ability at baseline | ↓ ns L                                |
| 16             | "                                | $b = -.06$               | 95% CI: $-.16, .05$            | 403         | Age; work ability at baseline | ↑ ns L                                |
| 17             | Fisher <i>et al.</i> , 2000 [47] | RR = 1.52                | $p < .05$ ; 95% CI: 1.36, 1.70 | Unclear     | Age                           | ↑ * L                                 |

|    |                                       |           |                                   |         |                                                          |        |
|----|---------------------------------------|-----------|-----------------------------------|---------|----------------------------------------------------------|--------|
| 18 | "                                     | RR = 1.18 | 95% CI: 0.88, 1.60                | Unclear | Age                                                      | ↑ ns L |
| 19 | "                                     | RR = 1.76 | $p < .05$ ; 95% CI:<br>1.34, 2.33 | Unclear | Age                                                      | ↑ * L  |
| 20 | "                                     | RR = 1.38 | 95% CI: 0.72, 2.61                | Unclear | Age                                                      | ↑ ns L |
| 21 | "                                     | RR = 1.25 | 95% CI: 0.96, 1.62                | Unclear | Age                                                      | ↑ ns L |
| 22 | "                                     | RR = 0.58 | 95% CI: 0.26, 1.30                | Unclear | Age                                                      | ↓ ns L |
| 23 | "                                     | RR = 1.39 | 95% CI: 0.62, 3.12                | Unclear | Age                                                      | ↑ ns L |
| 24 | Karlsson <i>et al.</i> , 2010<br>[48] | OR = 0.91 | 95% CI: 0.33, 2.55                | 300     | Gender; age                                              | ↓ ns L |
| 25 | "                                     | OR = 2.33 | 95% CI: 0.84, 6.51                | 289     | Gender; age                                              | ↑ ns L |
| 26 | Kessler & Frank, 1997<br>[49]         | b = .88   | $p < .05$                         | 4091    | Unadjusted                                               | ↑ * L  |
| 27 | "                                     | b = .17   | ns                                | 4091    | Unadjusted                                               | ↑ ns L |
| 28 | Kim <i>et al.</i> , 2013 [50]         | unclear   | $p < .001$                        | 946     | Unadjusted                                               | * L    |
| 29 | "                                     | unclear   | $p = .03$                         | 946     | Age; employment; education;<br>body mass index; drug use | * M    |
| 30 | "                                     | unclear   | $p = .10$                         | 884     | Age; employment; education;<br>body mass index; drug use | ↓ ns M |
| 31 | "                                     | unclear   | $p = .11$                         | 577     | Age; employment; education;<br>body mass index; drug use | ↓ ns M |
| 32 | "                                     | unclear   | $p = .98$                         | 577     | Age; employment; education;<br>body mass index; drug use | ↓ ns M |

|    |                                   |               |                               |       |                                                                    |        |
|----|-----------------------------------|---------------|-------------------------------|-------|--------------------------------------------------------------------|--------|
| 33 | "                                 | unclear       | $p = .51$                     | 577   | Age; employment; education; body mass index; drug use              | ↓ ns M |
| 34 | "                                 | unclear       | $p = .97$                     | 369   | Age; employment; education; body mass index; drug use              | ↑ ns M |
| 35 | "                                 | unclear       | $p = .53$                     | 62    | Age; employment; education; body mass index; drug use              | ↑ ns M |
| 36 | Kirkham <i>et al.</i> , 2015 [51] | $\beta = .20$ | $p < .001$ ; 95% CI: .14, .27 | 27459 | Age; gender; region of residence; misc. work-related factors       | ↑ * H  |
| 37 | "                                 | $\beta = .22$ | $p < .001$ ; 95% CI: .13, .32 | 10639 | Age; gender; region of residence; misc. work-related factors       | ↑ * H  |
| 38 | "                                 | $\beta = .20$ | $p < .001$ ; 95% CI: .10, .29 | 16820 | Age; gender; region of residence; misc. work-related factors       | ↑ * H  |
| 39 | Odlaug <i>et al.</i> , 2016 [52]  | unclear       | $p < .05$                     | 1373  | Unadjusted                                                         | ↑ * L  |
| 40 | Pensola <i>et al.</i> , 2016 [53] | PRR = 1.22    | 95% CI: 1.1, 1.4              | 1351  | Age; gender                                                        | ↑ * M  |
| 41 | "                                 | PRR = 1.15    | 95% CI: 1.0, 1.3              | 1351  | Age; gender; misc. work-related, physical and psychosocial factors | ↑ * H  |
| 42 | "                                 | PRR = 1.30    | 95% CI: 1.1, 1.6              | 546   | Age                                                                | ↑ * M  |
| 43 | "                                 | PRR = 1.21    | 95% CI: 1.0, 1.5              | 546   | Age; gender; misc. work-related, physical and psychosocial factors | ↑ * M  |

|    |                                           |                           |                    |      |                                                                    |        |
|----|-------------------------------------------|---------------------------|--------------------|------|--------------------------------------------------------------------|--------|
| 44 | "                                         | PRR = 1.15                | 95% CI: 1.0, 1.4   | 805  | Age                                                                | ↑ * M  |
| 45 | "                                         | PRR = 1.01                | 95% CI: 0.9, 1.2   | 573  | Age; gender                                                        | ↑ ns M |
| 46 | "                                         | PRR = 1.92                | 95% CI: 1.4, 2.7   | 778  | Age; gender                                                        | ↑ * M  |
| 47 | "                                         | PRR = 1.80                | 95% CI: 1.3, 2.6   | 778  | Age; gender; misc. work-related, physical and psychosocial factors | ↑ * M  |
| 48 | Richmond <i>et al.</i> , 2016 [54]        | b = 0.017; $\beta$ = .057 | ns                 | 338  | Baseline presenteeism                                              | ↑ ns L |
| 49 | Schou <i>et al.</i> , 2017 [55]           | r = .458                  | p <.01             | 1406 | Unadjusted                                                         | ↑ * L  |
| 50 | Steedmann <i>et al.</i> , 1997 [56]       | r = .073                  | ns                 | 45   | Unadjusted                                                         | ↑ ns L |
| 51 | Tsuchiya <i>et al.</i> , 2012 [57]        | b = -1.1                  | 95% CI: -2.1, -0.0 | 530  | Unadjusted                                                         | ↑ * L  |
| 52 | "                                         | b = -1.1                  | 95% CI: -2.1, -0.1 | 530  | Gender; age; education; job category; work time                    | ↑ * M  |
| 53 | van Scheppingen <i>et al.</i> , 2014 [58] | r = .01                   | ns                 | 629  | Unadjusted                                                         | ↑ ns L |
| 54 | Yu <i>et al.</i> , 2015 [59]              | $\chi^2$ = 4.6            | p <.05             | 1506 | Unadjusted                                                         | ↑ * L  |
| 55 | "                                         | OR = 1.76                 | 95% CI: 1.02, 3.03 | 1506 | unclear                                                            | ↑ * L  |
| 56 | Friedman <i>et al.</i> , 1992 [60]        | r = -.09                  | p <.01             | 860  | Unadjusted                                                         | ↑ * L  |
| 57 | "                                         | r = .02                   | ns                 | 860  | Unadjusted                                                         | ↑ ns L |
| 58 | "                                         | r = -.14                  | p <.01             | 973  | Unadjusted                                                         | ↑ * L  |

|    |                                 |                   |            |      |                                 |        |
|----|---------------------------------|-------------------|------------|------|---------------------------------|--------|
| 59 | "                               | $r = .09$         | $p < .01$  | 973  | Unadjusted                      | ↑ * L  |
| 60 | "                               | $r = -.12$        | $p < .01$  | 886  | Unadjusted                      | ↑ * L  |
| 61 | "                               | $r = .05$         | ns         | 886  | Unadjusted                      | ↑ ns L |
| 62 | "                               | $r = -.13$        | $p < .01$  | 852  | Unadjusted                      | ↑ * L  |
| 63 | "                               | $r = .06$         | ns         | 852  | Unadjusted                      | ↑ ns L |
| 64 | "                               | $r = .09$         | $p < .01$  | 863  | Unadjusted                      | ↑ * L  |
| 65 | "                               | $r = .03$         | ns         | 863  | Unadjusted                      | ↑ ns L |
| 66 | "                               | $r = .10$         | $p < .01$  | 1229 | Unadjusted                      | ↓ ns L |
| 67 | "                               | $r = .06$         | $p < .05$  | 1229 | Unadjusted                      | ↑ * L  |
| 68 | "                               | $r = .09$         | $p < .01$  | 1229 | Unadjusted                      | ↓ * L  |
| 69 | "                               | $r = .07$         | $p < .05$  | 1229 | Unadjusted                      | ↑ * L  |
| 70 | Boles <i>et al.</i> , 2004 [61] | unclear           | ns         | 2264 | Age; gender; misc. risk factors | ↑ ns H |
| 71 | "                               | OR = 3.74         | $p = .115$ | 2264 | Age; gender; misc. risk factors | ↑ ns H |
| 72 | "                               | b = 0.901         | $p = .930$ | 2264 | Age; gender; misc. risk factors | ↑ ns H |
| 73 | Blum <i>et al.</i> , 1993 [62]  | $r = -.016$       | ns         | 136  | Unadjusted                      | ↑ ns L |
| 74 | "                               | $M_{diff} = 0.01$ | ns         | 136  | Unadjusted                      | ↑ ns L |
| 75 | "                               | $M_{diff} = 0.21$ | ns         | 136  | Unadjusted                      | ↑ ns L |
| 76 | "                               | $M_{diff} = 0.05$ | ns         | 136  | Unadjusted                      | ↑ ns L |

|    |                                     |                             |           |       |                                           |        |
|----|-------------------------------------|-----------------------------|-----------|-------|-------------------------------------------|--------|
| 77 | "                                   | $r = -.185$                 | $p < .05$ | 136   | Unadjusted                                | ↑ * L  |
| 78 | "                                   | $M_{\text{diff}} = 0.19$    | $p < .05$ | 136   | Unadjusted                                | ↑ * L  |
| 79 | "                                   | $M_{\text{diff}} = 0.16$    | ns        | 136   | Unadjusted                                | ↑ ns L |
| 80 | "                                   | $M_{\text{diff}} = 0.03$    | ns        | 136   | Unadjusted                                | ↑ ns L |
| 81 | "                                   | $r = -.233$                 | $p < .01$ | 136   | Unadjusted                                | ↑ * L  |
| 82 | "                                   | $M_{\text{diff}} = 0.28$    | $p < .01$ | 136   | Unadjusted                                | ↑ * L  |
| 83 | "                                   | $M_{\text{diff}} = 0.35$    | $p < .01$ | 136   | Unadjusted                                | ↑ * L  |
| 84 | "                                   | $M_{\text{diff}} = 0.03$    | $p < .05$ | 136   | Unadjusted                                | ↑ * L  |
| 85 | Burton <i>et al.</i> , 2005 [63]    | $M_{\text{diff}} = -0.0748$ | ns        | 28375 | Age; gender; diseases; misc. risk factors | ↓ ns H |
| 86 | "                                   | $M_{\text{diff}} = -0.0447$ | ns        | 28375 | Age; gender; diseases; misc. risk factors | ↓ ns H |
| 87 | "                                   | $M_{\text{diff}} = -0.0833$ | ns        | 28375 | Age; gender; diseases; misc. risk factors | ↓ ns H |
| 88 | "                                   | $M_{\text{diff}} = -0.0853$ | ns        | 28375 | Age; gender; diseases; misc. risk factors | ↓ ns H |
| 89 | "                                   | $M_{\text{diff}} = -0.0865$ | ns        | 28375 | Age; gender; diseases; misc. risk factors | ↓ ns H |
| 90 | Lim <i>et al.</i> , 2000 [64]       | $b = -0.92$                 | ns        | 4579  | Physical and mental disorders             | ↓ ns M |
| 91 | "                                   | $b = 0.18$                  | ns        | 4579  | Physical and mental disorders             | ↑ ns M |
| 92 | Lowmaster <i>et al.</i> , 2012 [65] | $r = .21$                   | ns        | 85    | Unadjusted                                | ↓ ns L |
| 93 | "                                   | $r = .12$                   | ns        | 29    | Unadjusted                                | ↓ ns L |

|     |                                 |                            |           |      |                                         |        |
|-----|---------------------------------|----------------------------|-----------|------|-----------------------------------------|--------|
| 94  | "                               | $r = .23$                  | ns        | 56   | Unadjusted                              | ↓ ns L |
| 95  | Moore <i>et al.</i> , 2000 [66] | unclear                    | $p < .05$ | 1521 | Unadjusted                              | ↑ * L  |
| 96  | "                               | unclear                    | $p < .05$ | 1378 | Unadjusted                              | ↑ * L  |
| 97  | "                               | unclear                    | $p < .05$ | 520  | Unadjusted                              | ↑ * L  |
| 98  | "                               | unclear                    | $p < .05$ | 2256 | Demographic variables                   | * M    |
| 99  | "                               | $M_{diff} = 0.1$           | $p = .65$ | 1780 | Demographic variables                   | ↓ ns M |
| 100 | "                               | $M_{diff} = 0.2$           | $p = .10$ | 520  | Demographic variables                   | ↑ ns M |
| 101 | "                               | $M_{diff} = 0.3$           | $p < .01$ | 1378 | Demographic variables                   | ↑ * M  |
| 102 | "                               | $M_{diff} = 0.0$           | $p = .68$ | 676  | Demographic variables                   | ns M   |
| 103 | "                               | $M_{diff} = 0.1$           | $p = .09$ | 1534 | Demographic variables                   | ↑ ns M |
| 104 | "                               | $M_{diff} = 0.2$           | $p = .10$ | 274  | Demographic variables                   | ↑ ns L |
| 105 | "                               | $M_{diff} = 0.1$           | $p = .42$ | 663  | Demographic variables                   | ↑ ns M |
| 106 | "                               | $M_{diff} = 0.2$           | $p < .05$ | 1521 | Demographic variables                   | ↑ * M  |
| 107 | "                               | $M_{diff} = 0.1$           | $p = .22$ | 261  | Demographic variables                   | ↑ ns L |
| 108 | Ames <i>et al.</i> , 1997 [21]  | $b = -0.02; \beta = -0.02$ | ns        | 832  | Drinking variables; job characteristics | ↓ ns M |
| 109 | "                               | $b = 0.08; \beta = .08$    | $p < .05$ | 832  | Drinking variables; job characteristics | ↑ * M  |
| 110 | "                               | $b = 0.08; \beta = .08$    | $p < .05$ | 832  | Drinking variables; job characteristics | ↑ * M  |
| 111 | "                               | $b = -0.01; \beta = -0.01$ | ns        | 832  | Drinking variables; job characteristics | ↓ ns M |

|     |                                |                            |                    |      |                                                                          |        |
|-----|--------------------------------|----------------------------|--------------------|------|--------------------------------------------------------------------------|--------|
| 112 | "                              | $b = -0.03; \beta = -0.03$ | ns                 | 832  | Drinking variables; job characteristics                                  | ↓ ns M |
| 113 | "                              | $b = -0.02; \beta = -0.02$ | ns                 | 832  | Drinking variables; sociodemographics                                    | ↓ ns M |
| 114 | "                              | $b = -0.01; \beta = -0.01$ | ns                 | 832  | Drinking variables; sociodemographics                                    | ↓ ns M |
| 115 | "                              | $b = 0.21; \beta = .21$    | $p < .001$         | 832  | Drinking variables; sociodemographics                                    | ↑ * M  |
| 116 | "                              | $b = -0.01; \beta = -0.01$ | ns                 | 832  | Drinking variables; sociodemographics                                    | ↓ ns M |
| 117 | "                              | $b = 0.00; \beta = .00$    | ns                 | 832  | Drinking variables; sociodemographics                                    | ↑ ns M |
| 118 | "                              | $\eta^2 = .01$             | $p < .02$          | 832  | Unadjusted                                                               | ↑ * L  |
| 119 | "                              | $\eta^2 = .01$             | $p < .05$          | 832  | Unadjusted                                                               | ↑ * L  |
| 120 | "                              | $\eta^2 = .02$             | $p < .01$          | 832  | Unadjusted                                                               | ↑ * L  |
| 121 | "                              | $\eta^2 = .01$             | $p < .05$          | 832  | Unadjusted                                                               | ↑ * L  |
| 122 | Furu <i>et al.</i> , 2018 [67] | OR = 1.25                  | 95% CI: 0.98, 1.61 | 1622 | Unadjusted                                                               | ↑ ns L |
| 123 | "                              | OR = 1.36                  | 95% CI: 1.05, 1.77 | 1622 | Age                                                                      | ↑ * M  |
| 124 | Aas <i>et al.</i> , 2017 [40]  | $r = .049$                 | $p < .01$          | 3278 | Unadjusted                                                               | ↑ * L  |
| 125 | "                              | $r = .076$                 | $p < .001$         | 3278 | Unadjusted                                                               | ↑ * L  |
| 126 | "                              | $b = 0.016; \beta = .028$  | ns                 | 3278 | Gender; age; education; living status; employment sector; binge drinking | ↑ ns H |



|     |                                        |                           |                    |      |                                                                              |        |
|-----|----------------------------------------|---------------------------|--------------------|------|------------------------------------------------------------------------------|--------|
| 127 | "                                      | b = 0.040; $\beta$ = .057 | $p < .01$          | 3278 | Gender; age; education; living status; employment sector; drinking frequency | ↑ * H  |
| 128 | van den Berg <i>et al.</i> , 2017 [68] | OR = 1.23                 | 95% CI: 0.87, 1.74 | 509  | Gender; age; education                                                       | ↑ ns M |
| 129 | "                                      | OR = 1.28                 | 95% CI: 0.99, 1.65 | 1267 | Gender; age; education                                                       | ↑ ns M |
| 130 | "                                      | OR = 1.00                 | ns                 | 410  | Gender; age; education                                                       | ns L   |
| 131 | "                                      | OR = 1.18                 | 95% CI: 0.66, 3.11 | 413  | Gender; age; education                                                       | ↑ ns L |
| 132 | "                                      | OR = 1.52                 | 95% CI: 0.96, 2.41 | 335  | Gender; age; education                                                       | ↑ ns L |

<sup>a</sup>  $r$  = correlation coefficient;  $b$  = unstandardised regression coefficient; RR = relative risk; OR = odds ratio;  $\beta$  = standardised regression coefficient; PRR = prevalence risk ratio;  $\chi^2$  = chi square;  $M_{diff}$  = mean difference;  $\eta^2$  = eta squared

<sup>b</sup> ↑ = positive association; ↓ = negative association; | = inconsistent direction; \* = significant association; ns = non-significant association; L = low quality association; M = moderate quality association; H = high quality association
