# Supplementary material for: Association between alcohol consumption and impaired work performance (presenteeism): a systematic review
Source: PubMed Central journal article supplement — BMJ Open. 2019 Jul 16;9(7):e029184. doi: 10.1136/bmjopen-2019-029184 (PMC6661906; doi:10.1136/bmjopen-2019-029184), 2019-07-16
Supplement: bmjopen-2019-029184supp003.pdf [file bmjopen-2019-029184supp003.pdf]

**Supplementary File 3.** Results of quality assessments of included associations (n = 132)

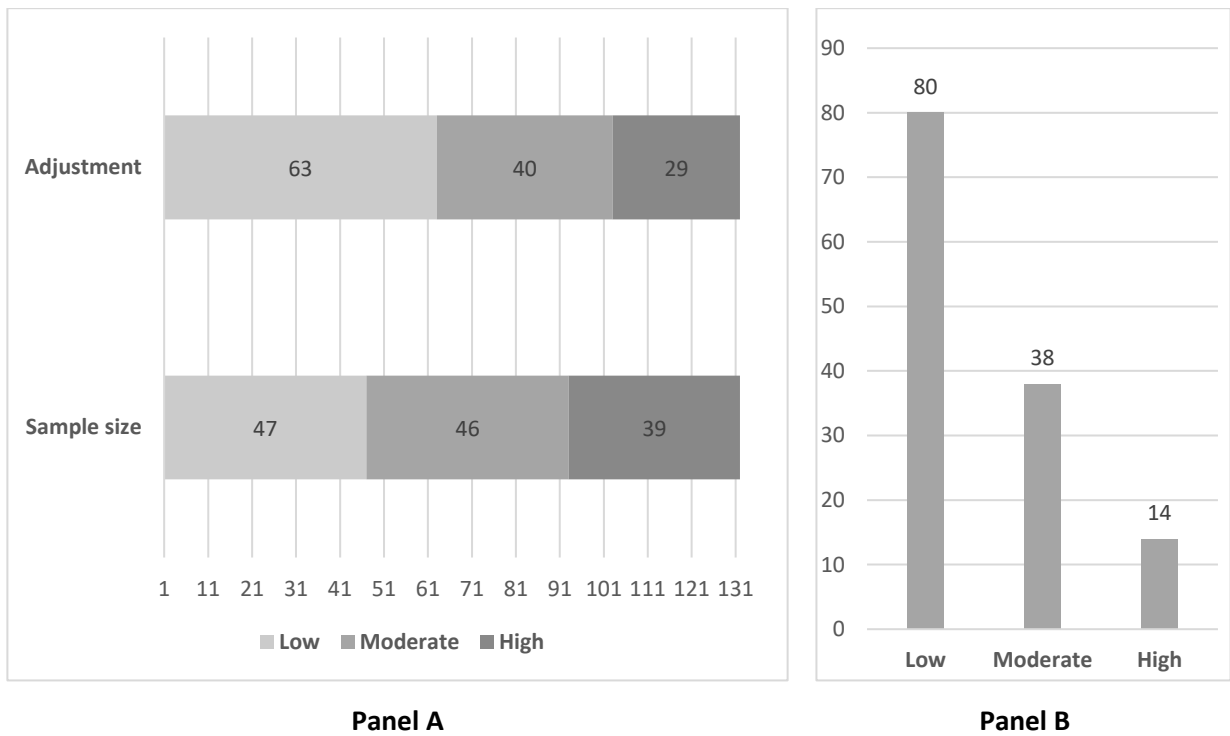

Panel A displays quality assessments separately on two key domains (sample size and level of adjustment). Panel B displays overall assessments according to the “worst score counts” algorithm.
